# Supplementary material
Source: publisher figshare collection journal article supplement (https://acs.figshare.com/ndownloader/files/3895294)
Supplement: Supplementary file 1 [file 3895294]

data_839sb1
 
_audit_creation_date                    2014-04-22T11:43:05-00:00
_audit_creation_method                  'WinGX routine CIF_UPDATE'
_audit_conform_dict_name                cif_core.dic
_audit_conform_dict_version             2.4
_audit_conform_dict_location            ftp://ftp.iucr.org/pub/cif_core.dic
_publ_requested_category                FM
 
#----------------------------------------------------------------------------#
#                   CHEMICAL INFORMATION                                     #
#----------------------------------------------------------------------------#
 
_chemical_name_systematic
;
 ?
;
_chemical_formula_moiety                'C45 H55 N8 O6 Zn2, P F6'
_chemical_formula_sum                   'C45 H55 F6 N8 O6 P Zn2'
_chemical_formula_weight                1079.68
_chemical_compound_source               'synthesis as described'
 
#----------------------------------------------------------------------------#
#                   UNIT CELL INFORMATION                                    #
#----------------------------------------------------------------------------#
 
_symmetry_cell_setting                  monoclinic
_symmetry_space_group_name_H-M          'P 1 21/n 1'
_symmetry_space_group_name_Hall         '-P 2yn'
_symmetry_Int_Tables_number             14
loop_
    _symmetry_equiv_pos_as_xyz
'x, y, z'
'-x+1/2, y+1/2, -z+1/2'
'-x, -y, -z'
'x-1/2, -y-1/2, z-1/2'
 
_cell_length_a                          16.8815(6)
_cell_length_b                          13.5366(5)
_cell_length_c                          21.8837(9)
_cell_angle_alpha                       90
_cell_angle_beta                        105.077(4)
_cell_angle_gamma                       90
_cell_volume                            4828.7(3)
_cell_formula_units_Z                   4
_cell_measurement_temperature           293(2)
_cell_measurement_reflns_used           9096
_cell_measurement_theta_min             2.9596
_cell_measurement_theta_max             62.6873
_cell_measurement_wavelength            1.5418
 
#----------------------------------------------------------------------------#
#                   CRYSTAL INFORMATION                                      #
#----------------------------------------------------------------------------#
 
_exptl_crystal_description              prism
_exptl_crystal_colour                   colourless
_exptl_crystal_size_max                 0.2
_exptl_crystal_size_mid                 0.1
_exptl_crystal_size_min                 0.1
_exptl_crystal_density_diffrn           1.485
_exptl_crystal_density_method           'not measured'
_exptl_crystal_F_000                    2232
_exptl_special_details
;
 ?
;
 
#----------------------------------------------------------------------------#
#                   ABSORPTION CORRECTION                                    #
#----------------------------------------------------------------------------#
 
_exptl_absorpt_coefficient_mu           2.215
_exptl_absorpt_correction_type          multi-scan
_exptl_absorpt_process_details
;
        CrysAlisPro, Agilent Technologies,
        Version 1.171.36.20 (release 27-06-2012 CrysAlis171 .NET)
        (compiled Jul 11 2012,15:38:31)
        Empirical absorption correction using spherical harmonics,
 implemented in SCALE3 ABSPACK scaling algorithm.
;
_exptl_absorpt_correction_T_min         0.92816
_exptl_absorpt_correction_T_max         1
 
#----------------------------------------------------------------------------#
#                   DATA COLLECTION                                          #
#----------------------------------------------------------------------------#
 
_diffrn_ambient_temperature             293(2)
_diffrn_radiation_wavelength            1.5418
_diffrn_radiation_type                  CuK\a
_diffrn_radiation_monochromator         graphite
_diffrn_radiation_probe                 x-ray
_diffrn_detector_area_resol_mean        16.0696
_diffrn_orient_matrix_ub_11             0.0436694
_diffrn_orient_matrix_ub_12             0.0043411
_diffrn_orient_matrix_ub_13             0.0711531
_diffrn_orient_matrix_ub_21             0.0085655
_diffrn_orient_matrix_ub_22             -0.1132758
_diffrn_orient_matrix_ub_23             0.0013549
_diffrn_orient_matrix_ub_31             0.0833843
_diffrn_orient_matrix_ub_32             0.0094303
_diffrn_orient_matrix_ub_33             -0.015941
_diffrn_measurement_device_type         'Xcalibur, Sapphire3, Gemini ultra'
_diffrn_measurement_method              '\w scans'
_diffrn_reflns_av_R_equivalents         0.0738
_diffrn_reflns_av_unetI/netI            0.0445
_diffrn_reflns_number                   53093
_diffrn_reflns_limit_h_min              -15
_diffrn_reflns_limit_h_max              19
_diffrn_reflns_limit_k_min              -15
_diffrn_reflns_limit_k_max              15
_diffrn_reflns_limit_l_min              -25
_diffrn_reflns_limit_l_max              24
_diffrn_reflns_theta_min                2.96
_diffrn_reflns_theta_max                62.39
_diffrn_reflns_theta_full               62.39
_diffrn_measured_fraction_theta_full
                                        0.993
_diffrn_measured_fraction_theta_max
                                        0.993
_reflns_number_total                    7633
_reflns_number_gt                       5846
_reflns_threshold_expression            >2\s(I)
 
#----------------------------------------------------------------------------#
#                   COMPUTER PROGRAMS USED                                   #
#----------------------------------------------------------------------------#
 
_computing_data_collection
;
        CrysAlisPro, Agilent Technologies,
        Version 1.171.36.20 (release 27-06-2012 CrysAlis171 .NET)
        (compiled Jul 11 2012,15:38:31)
;
_computing_cell_refinement
;
        CrysAlisPro, Agilent Technologies,
        Version 1.171.36.20 (release 27-06-2012 CrysAlis171 .NET)
        (compiled Jul 11 2012,15:38:31)
;
_computing_data_reduction
;
        CrysAlisPro, Agilent Technologies,
        Version 1.171.36.20 (release 27-06-2012 CrysAlis171 .NET)
        (compiled Jul 11 2012,15:38:31)
;
_computing_structure_solution           'SIR92 (Giacovazzo et al, 1993)'
_computing_structure_refinement         'SHELXL-97 (Sheldrick, 2008)'
_computing_molecular_graphics           'Ortep-3 for Windows (Farrugia, 1997)'
_computing_publication_material
                                   'WinGX publication routines (Farrugia, 1999)'
 
#----------------------------------------------------------------------------#
#                   STRUCTURE SOLUTION
#----------------------------------------------------------------------------#
 
_atom_sites_solution_primary            direct
_atom_sites_solution_secondary          difmap
_atom_sites_solution_hydrogens          geom
 
#----------------------------------------------------------------------------#
#                   REFINEMENT INFORMATION                                   #
#----------------------------------------------------------------------------#
 
_refine_special_details
;
 Refinement of F^2^ against ALL reflections.  The weighted R-factor wR and
 goodness of fit S are based on F^2^, conventional R-factors R are based
 on F, with F set to zero for negative F^2^. The threshold expression of
 F^2^ > 2\s(F^2^) is used only for calculating R-factors(gt) etc. and is
 not relevant to the choice of reflections for refinement.  R-factors based
 on F^2^ are statistically about twice as large as those based on F, and R-
 factors based on ALL data will be even larger.
;
_refine_ls_structure_factor_coef        Fsqd
_refine_ls_matrix_type                  full
_refine_ls_weighting_scheme             calc
_refine_ls_weighting_details
         'calc w=1/[\s^2^(Fo^2^)+(0.0658P)^2^+3.4436P] where P=(Fo^2^+2Fc^2^)/3'
_refine_ls_hydrogen_treatment           constr
_refine_ls_extinction_method            none
_refine_ls_number_reflns                7633
_refine_ls_number_parameters            668
_refine_ls_number_restraints            15
_refine_ls_R_factor_all                 0.0669
_refine_ls_R_factor_gt                  0.0485
_refine_ls_wR_factor_ref                0.1324
_refine_ls_wR_factor_gt                 0.1198
_refine_ls_goodness_of_fit_ref          1.018
_refine_ls_restrained_S_all             1.02
_refine_ls_shift/su_max                 0.009
_refine_ls_shift/su_mean                0
_refine_diff_density_max                0.513
_refine_diff_density_min                -0.386
_refine_diff_density_rms                0.063
 
#----------------------------------------------------------------------------#
#                   ATOMIC TYPES, COORDINATES AND THERMAL PARAMETERS         #
#----------------------------------------------------------------------------#
 
loop_
    _atom_type_symbol
    _atom_type_description
    _atom_type_scat_dispersion_real
    _atom_type_scat_dispersion_imag
    _atom_type_scat_source
C C 0.0181 0.0091 'International Tables Vol C Tables 4.2.6.8 and 6.1.1.4'
H H 0 0 'International Tables Vol C Tables 4.2.6.8 and 6.1.1.4'
N N 0.0311 0.018 'International Tables Vol C Tables 4.2.6.8 and 6.1.1.4'
O O 0.0492 0.0322 'International Tables Vol C Tables 4.2.6.8 and 6.1.1.4'
F F 0.0727 0.0534 'International Tables Vol C Tables 4.2.6.8 and 6.1.1.4'
P P 0.2955 0.4335 'International Tables Vol C Tables 4.2.6.8 and 6.1.1.4'
Zn Zn -1.5491 0.6778 'International Tables Vol C Tables 4.2.6.8 and 6.1.1.4'
 
loop_
    _atom_site_label
    _atom_site_type_symbol
    _atom_site_fract_x
    _atom_site_fract_y
    _atom_site_fract_z
    _atom_site_U_iso_or_equiv
    _atom_site_adp_type
    _atom_site_occupancy
    _atom_site_symmetry_multiplicity
    _atom_site_calc_flag
    _atom_site_refinement_flags
    _atom_site_disorder_assembly
    _atom_site_disorder_group
C1 C 0.4277(3) -0.1237(4) 0.4771(2) 0.0669(12) Uani 1 1 d . . .
H1 H 0.4403 -0.0625 0.4965 0.08 Uiso 1 1 calc R . .
C1A C 0.3338(2) 0.0776(3) 0.58313(19) 0.0528(10) Uani 1 1 d . . .
C2 C 0.4879(3) -0.1753(5) 0.4588(2) 0.0839(17) Uani 1 1 d . . .
H2 H 0.5408 -0.1499 0.4664 0.101 Uiso 1 1 calc R . .
C2A C 0.3700(3) 0.1094(4) 0.6512(2) 0.0816(14) Uani 1 1 d . . .
H2A H 0.3899 0.0525 0.6767 0.122 Uiso 1 1 calc R . .
H2B H 0.3284 0.1415 0.6668 0.122 Uiso 1 1 calc R . .
H2C H 0.4144 0.1545 0.6531 0.122 Uiso 1 1 calc R . .
C3 C 0.4690(3) -0.2643(5) 0.4293(3) 0.0869(17) Uani 1 1 d . . .
H3 H 0.5091 -0.3001 0.4168 0.104 Uiso 1 1 calc R . .
C4 C 0.3906(3) -0.3008(4) 0.4181(2) 0.0781(14) Uani 1 1 d . . .
H4 H 0.3765 -0.3609 0.3974 0.094 Uiso 1 1 calc R . .
C5 C 0.3329(2) -0.2455(3) 0.43850(19) 0.0556(10) Uani 1 1 d . . .
C6 C 0.2483(3) -0.2871(3) 0.4325(2) 0.0647(11) Uani 1 1 d . . .
H6A H 0.2279 -0.3154 0.3906 0.078 Uiso 1 1 calc R . .
H6B H 0.252 -0.3399 0.4631 0.078 Uiso 1 1 calc R . .
C7 C 0.2621(3) -0.1824(3) 0.6327(2) 0.0602(10) Uani 1 1 d . . .
H7 H 0.3001 -0.1329 0.6484 0.072 Uiso 1 1 calc R . .
C8 C 0.2434(3) -0.2483(4) 0.6748(2) 0.0738(13) Uani 1 1 d . . .
H8 H 0.268 -0.2436 0.718 0.089 Uiso 1 1 calc R . .
C9 C 0.1868(3) -0.3216(4) 0.6509(3) 0.0797(14) Uani 1 1 d . . .
H9 H 0.1724 -0.3668 0.6781 0.096 Uiso 1 1 calc R . .
C10 C 0.1521(3) -0.3275(3) 0.5869(2) 0.0656(11) Uani 1 1 d . . .
H10 H 0.1148 -0.3773 0.5703 0.079 Uiso 1 1 calc R . .
C11 C 0.1734(2) -0.2585(3) 0.5472(2) 0.0546(10) Uani 1 1 d . . .
C12 C 0.1339(2) -0.2562(3) 0.4775(2) 0.0567(10) Uani 1 1 d . . .
H12A H 0.1198 -0.3229 0.4624 0.068 Uiso 1 1 calc R . .
H12B H 0.0836 -0.218 0.4695 0.068 Uiso 1 1 calc R . .
C13 C 0.1441(2) -0.1656(3) 0.38215(18) 0.0522(9) Uani 1 1 d . . .
H31A H 0.1141 -0.2161 0.354 0.063 Uiso 1 1 calc R . .
H31B H 0.1833 -0.1362 0.3621 0.063 Uiso 1 1 calc R . .
C14 C 0.0851(2) -0.0876(3) 0.39149(17) 0.0469(8) Uani 1 1 d . . .
C15 C 0.0012(2) -0.0976(3) 0.36341(18) 0.0532(9) Uani 1 1 d . . .
H15 H -0.0173 -0.1524 0.3381 0.064 Uiso 1 1 calc R . .
C16 C -0.0553(2) -0.0279(3) 0.3722(2) 0.0582(10) Uani 1 1 d . . .
C17 C -0.1456(3) -0.0389(5) 0.3393(3) 0.0856(15) Uani 1 1 d . . .
H17A H -0.1538 -0.0975 0.3137 0.128 Uiso 1 1 calc R . .
H17B H -0.1639 0.0177 0.313 0.128 Uiso 1 1 calc R . .
H17C H -0.1763 -0.044 0.3705 0.128 Uiso 1 1 calc R . .
C18 C -0.0261(2) 0.0501(3) 0.4122(2) 0.0564(10) Uani 1 1 d . . .
H18 H -0.0635 0.0958 0.4199 0.068 Uiso 1 1 calc R . .
C19 C 0.0567(2) 0.0637(3) 0.44156(18) 0.0493(9) Uani 1 1 d . . .
C20 C 0.1131(2) -0.0053(3) 0.42964(17) 0.0449(8) Uani 1 1 d . . .
C21 C 0.0872(3) 0.1457(3) 0.4874(2) 0.0555(10) Uani 1 1 d . . .
H21A H 0.119 0.1176 0.5269 0.067 Uiso 1 1 calc R . .
H21B H 0.0405 0.1794 0.4958 0.067 Uiso 1 1 calc R . .
C22 C 0.1556(2) 0.1115(3) 0.29262(18) 0.0497(9) Uani 1 1 d . . .
C23 C 0.0873(3) 0.1071(3) 0.2417(2) 0.0619(11) Uani 1 1 d . . .
H23 H 0.0885 0.0712 0.2057 0.074 Uiso 1 1 calc R . .
C24 C 0.0179(3) 0.1562(4) 0.2450(2) 0.0700(12) Uani 1 1 d . . .
H24 H -0.029 0.1528 0.2115 0.084 Uiso 1 1 calc R . .
C25 C 0.0171(3) 0.2112(4) 0.2983(2) 0.0635(11) Uani 1 1 d . . .
H25 H -0.0289 0.2474 0.3006 0.076 Uiso 1 1 calc R . .
C26 C 0.0870(2) 0.2106(3) 0.34791(19) 0.0497(9) Uani 1 1 d . . .
C27 C 0.0919(2) 0.2700(3) 0.4067(2) 0.0533(9) Uani 1 1 d . . .
H27A H 0.1174 0.3331 0.4029 0.064 Uiso 1 1 calc R . .
H27B H 0.0367 0.2828 0.4103 0.064 Uiso 1 1 calc R . .
C28 C 0.3469(2) 0.3662(3) 0.45670(18) 0.0502(9) Uani 1 1 d . . .
C29 C 0.3732(3) 0.4533(3) 0.4891(2) 0.0647(11) Uani 1 1 d . . .
H29 H 0.4189 0.4866 0.4833 0.078 Uiso 1 1 calc R . .
C30 C 0.3312(3) 0.4891(4) 0.5293(3) 0.0744(13) Uani 1 1 d . . .
H30 H 0.3486 0.5467 0.5519 0.089 Uiso 1 1 calc R . .
C31 C 0.2626(3) 0.4400(3) 0.5368(2) 0.0691(12) Uani 1 1 d . . .
H31 H 0.2323 0.465 0.5633 0.083 Uiso 1 1 calc R . .
C32 C 0.2403(2) 0.3533(3) 0.50425(19) 0.0539(9) Uani 1 1 d . . .
C33 C 0.1696(3) 0.2936(3) 0.5149(2) 0.0576(10) Uani 1 1 d . . .
H33A H 0.187 0.2602 0.5554 0.069 Uiso 1 1 calc R . .
H33B H 0.1251 0.338 0.5167 0.069 Uiso 1 1 calc R . .
C34 C 0.2510(3) 0.0235(4) 0.2432(2) 0.0749(13) Uani 1 1 d . . .
C35 C 0.3284(3) -0.0375(3) 0.2547(2) 0.0604(10) Uani 1 1 d . . .
C36A C 0.3641(6) -0.0284(9) 0.2000(4) 0.189(5) Uani 1 1 d . . .
H36A H 0.3224 -0.0405 0.1616 0.283 Uiso 1 1 calc R . .
H36B H 0.4075 -0.0758 0.2039 0.283 Uiso 1 1 calc R . .
H36C H 0.3857 0.037 0.1989 0.283 Uiso 1 1 calc R . .
C36B C 0.3063(5) -0.1413(6) 0.2596(7) 0.206(7) Uani 1 1 d . . .
H36D H 0.2658 -0.1603 0.2218 0.31 Uiso 1 1 calc R . .
H36E H 0.2844 -0.1497 0.2955 0.31 Uiso 1 1 calc R . .
H36F H 0.3542 -0.1818 0.2645 0.31 Uiso 1 1 calc R . .
C36C C 0.3908(5) -0.0181(8) 0.3140(5) 0.198(6) Uani 1 1 d . . .
H36G H 0.4088 0.0493 0.3146 0.296 Uiso 1 1 calc R . .
H36H H 0.4367 -0.0615 0.3171 0.296 Uiso 1 1 calc R . .
H36I H 0.3678 -0.0293 0.3492 0.296 Uiso 1 1 calc R . .
C37 C 0.4434(3) 0.3670(4) 0.3888(2) 0.0595(10) Uani 1 1 d . . .
C38 C 0.4752(3) 0.3033(4) 0.3421(2) 0.0624(11) Uani 1 1 d . . .
C39A C 0.5347(4) 0.3645(5) 0.3155(3) 0.0957(18) Uani 1 1 d . . .
H39G H 0.5068 0.4214 0.294 0.144 Uiso 1 1 calc R . .
H39H H 0.5549 0.3251 0.2863 0.144 Uiso 1 1 calc R . .
H39I H 0.5799 0.3854 0.3495 0.144 Uiso 1 1 calc R . .
C39B C 0.4042(3) 0.2693(5) 0.2881(2) 0.0883(17) Uani 1 1 d . . .
H39A H 0.3759 0.3258 0.2665 0.132 Uiso 1 1 calc R . .
H39B H 0.367 0.2303 0.3046 0.132 Uiso 1 1 calc R . .
H39C H 0.4249 0.2302 0.259 0.132 Uiso 1 1 calc R . .
C39C C 0.5196(3) 0.2141(4) 0.3761(2) 0.0805(14) Uani 1 1 d . . .
H39D H 0.4824 0.1755 0.3929 0.121 Uiso 1 1 calc R . .
H39E H 0.5647 0.2354 0.4101 0.121 Uiso 1 1 calc R . .
H39F H 0.5399 0.1747 0.347 0.121 Uiso 1 1 calc R . .
N1 N 0.35119(19) -0.1595(3) 0.46788(15) 0.0550(8) Uani 1 1 d . . .
N2 N 0.18901(18) -0.2121(2) 0.44271(15) 0.0484(7) Uani 1 1 d . . .
N3 N 0.22837(19) -0.1864(2) 0.57063(15) 0.0505(7) Uani 1 1 d . . .
N4 N 0.15564(18) 0.1616(2) 0.34565(14) 0.0441(7) Uani 1 1 d . . .
N5 N 0.13911(19) 0.2198(2) 0.46493(15) 0.0483(7) Uani 1 1 d . . .
N6 N 0.28191(19) 0.3159(2) 0.46465(15) 0.0487(7) Uani 1 1 d . . .
N7 N 0.2295(2) 0.0626(2) 0.29453(16) 0.0536(8) Uani 1 1 d . . .
H7A H 0.2641 0.0565 0.3309 0.064 Uiso 1 1 calc R . .
N8 N 0.38659(19) 0.3231(3) 0.41476(15) 0.0533(8) Uani 1 1 d . . .
H8A H 0.3741 0.2628 0.4041 0.064 Uiso 1 1 calc R . .
O1 O 0.19436(14) 0.00897(18) 0.45547(12) 0.0479(6) Uani 1 1 d . . .
O2 O 0.33637(18) -0.0128(2) 0.57153(15) 0.0675(8) Uani 1 1 d . . .
O3 O 0.30589(19) 0.1428(2) 0.54448(13) 0.0640(7) Uani 1 1 d . . .
O4 O 0.2089(3) 0.0358(5) 0.19017(19) 0.161(3) Uani 1 1 d . . .
O5 O 0.4682(2) 0.4503(3) 0.40216(19) 0.0932(12) Uani 1 1 d . . .
O6 O 0.33541(15) 0.12007(19) 0.41062(12) 0.0480(6) Uani 1 1 d . . .
H6C H 0.3645 0.0638 0.4321 0.058 Uiso 1 1 d R . .
F1 F 0.0591(8) 0.5136(9) 0.6842(6) 0.114(5) Uani 0.557(15) 1 d PD A 1
F2 F 0.0960(17) 0.3062(9) 0.6403(13) 0.286(14) Uani 0.557(15) 1 d PD A 1
F3 F -0.0113(7) 0.3747(8) 0.6494(6) 0.133(4) Uani 0.557(15) 1 d PD A 1
F4 F 0.0863(9) 0.3708(15) 0.7326(5) 0.190(8) Uani 0.557(15) 1 d PD A 1
F5 F 0.0671(19) 0.4383(15) 0.5969(8) 0.270(13) Uani 0.557(15) 1 d PD A 1
F6 F 0.1684(6) 0.4384(9) 0.6810(14) 0.235(11) Uani 0.557(15) 1 d PD A 1
F1' F 0.1517(18) 0.4399(14) 0.7263(7) 0.237(14) Uani 0.443(15) 1 d PD A 2
F2' F 0.0254(12) 0.370(2) 0.6106(13) 0.307(19) Uani 0.443(15) 1 d PD A 2
F3' F 0.0369(14) 0.5036(14) 0.6621(14) 0.194(12) Uani 0.443(15) 1 d PD A 2
F4' F 0.030(2) 0.3598(13) 0.7060(18) 0.29(2) Uani 0.443(15) 1 d PD A 2
F5' F 0.1275(13) 0.4508(7) 0.6212(9) 0.138(8) Uani 0.443(15) 1 d PD A 2
F6' F 0.1297(9) 0.3073(9) 0.6723(7) 0.131(6) Uani 0.443(15) 1 d PD A 2
P1 P 0.08194(12) 0.40577(11) 0.66717(8) 0.0940(5) Uani 1 1 d . . .
Zn1 Zn 0.26274(3) -0.09526(4) 0.50412(2) 0.04722(15) Uani 1 1 d . . .
Zn2 Zn 0.24403(3) 0.15036(4) 0.44630(2) 0.04644(15) Uani 1 1 d . . .
 
loop_
    _atom_site_aniso_label
    _atom_site_aniso_U_11
    _atom_site_aniso_U_22
    _atom_site_aniso_U_33
    _atom_site_aniso_U_23
    _atom_site_aniso_U_13
    _atom_site_aniso_U_12
C1 0.045(2) 0.091(3) 0.067(3) 0.007(2) 0.018(2) -0.005(2)
C1A 0.044(2) 0.063(3) 0.053(2) -0.003(2) 0.0152(17) -0.0113(18)
C2 0.043(2) 0.142(5) 0.071(3) 0.017(3) 0.023(2) 0.009(3)
C2A 0.094(4) 0.088(4) 0.056(3) -0.007(2) 0.007(2) -0.015(3)
C3 0.066(3) 0.130(5) 0.073(3) 0.011(3) 0.032(3) 0.032(3)
C4 0.076(3) 0.093(4) 0.070(3) 0.005(3) 0.028(2) 0.030(3)
C5 0.052(2) 0.061(3) 0.056(2) 0.003(2) 0.0176(18) 0.0113(19)
C6 0.057(2) 0.054(2) 0.085(3) -0.014(2) 0.022(2) 0.005(2)
C7 0.062(2) 0.059(2) 0.062(3) 0.004(2) 0.019(2) 0.003(2)
C8 0.085(3) 0.077(3) 0.062(3) 0.014(2) 0.023(2) 0.004(3)
C9 0.092(4) 0.073(3) 0.084(4) 0.021(3) 0.042(3) 0.001(3)
C10 0.067(3) 0.052(2) 0.084(3) 0.009(2) 0.031(2) -0.005(2)
C11 0.048(2) 0.048(2) 0.074(3) 0.0048(19) 0.026(2) 0.0038(18)
C12 0.047(2) 0.051(2) 0.073(3) 0.0042(19) 0.018(2) -0.0084(18)
C13 0.053(2) 0.054(2) 0.051(2) -0.0077(18) 0.0161(17) -0.0087(18)
C14 0.046(2) 0.052(2) 0.0441(19) 0.0026(16) 0.0154(16) -0.0050(17)
C15 0.049(2) 0.058(2) 0.052(2) 0.0042(18) 0.0119(17) -0.0083(19)
C16 0.041(2) 0.066(3) 0.068(3) 0.014(2) 0.0154(18) -0.0047(19)
C17 0.051(3) 0.092(4) 0.105(4) 0.007(3) 0.005(3) -0.002(3)
C18 0.045(2) 0.057(2) 0.074(3) 0.006(2) 0.028(2) -0.0010(18)
C19 0.048(2) 0.051(2) 0.056(2) 0.0039(17) 0.0264(17) -0.0053(17)
C20 0.0414(19) 0.048(2) 0.048(2) 0.0065(16) 0.0175(16) -0.0047(16)
C21 0.058(2) 0.053(2) 0.069(2) -0.0018(19) 0.039(2) -0.0038(18)
C22 0.057(2) 0.045(2) 0.051(2) 0.0059(17) 0.0225(18) 0.0008(17)
C23 0.066(3) 0.068(3) 0.054(2) -0.003(2) 0.020(2) -0.001(2)
C24 0.059(3) 0.086(3) 0.060(3) 0.001(2) 0.009(2) -0.003(2)
C25 0.051(2) 0.074(3) 0.067(3) 0.006(2) 0.019(2) 0.008(2)
C26 0.049(2) 0.047(2) 0.060(2) 0.0063(17) 0.0254(18) -0.0002(17)
C27 0.050(2) 0.045(2) 0.071(3) 0.0019(18) 0.0285(19) 0.0080(17)
C28 0.046(2) 0.052(2) 0.054(2) 0.0024(17) 0.0133(17) 0.0003(17)
C29 0.063(3) 0.055(2) 0.079(3) -0.014(2) 0.025(2) -0.013(2)
C30 0.073(3) 0.055(3) 0.099(4) -0.026(2) 0.030(3) -0.015(2)
C31 0.079(3) 0.059(3) 0.079(3) -0.025(2) 0.038(2) -0.003(2)
C32 0.058(2) 0.050(2) 0.058(2) -0.0071(18) 0.0229(19) 0.0009(18)
C33 0.063(2) 0.053(2) 0.067(2) -0.0152(19) 0.035(2) -0.0061(19)
C34 0.088(3) 0.084(3) 0.057(3) 0.000(2) 0.026(3) 0.028(3)
C35 0.062(2) 0.054(2) 0.071(3) -0.014(2) 0.028(2) 0.001(2)
C36A 0.192(9) 0.270(13) 0.147(7) 0.065(8) 0.119(7) 0.126(9)
C36B 0.112(6) 0.101(6) 0.45(2) 0.079(9) 0.147(10) 0.035(5)
C36C 0.115(6) 0.220(11) 0.214(10) -0.130(9) -0.035(6) 0.093(7)
C37 0.050(2) 0.067(3) 0.063(3) 0.000(2) 0.0189(19) -0.009(2)
C38 0.051(2) 0.085(3) 0.055(2) 0.005(2) 0.0217(19) 0.004(2)
C39A 0.094(4) 0.117(5) 0.094(4) 0.011(3) 0.055(3) -0.005(3)
C39B 0.070(3) 0.131(5) 0.060(3) -0.014(3) 0.009(2) 0.016(3)
C39C 0.062(3) 0.109(4) 0.073(3) 0.011(3) 0.021(2) 0.022(3)
N1 0.0475(18) 0.066(2) 0.0546(19) 0.0073(17) 0.0186(15) 0.0014(16)
N2 0.0430(16) 0.0426(16) 0.0616(19) -0.0036(14) 0.0171(14) -0.0002(13)
N3 0.0474(17) 0.0482(18) 0.059(2) 0.0020(15) 0.0193(15) 0.0000(14)
N4 0.0453(16) 0.0397(16) 0.0530(17) 0.0023(13) 0.0229(14) 0.0033(13)
N5 0.0516(17) 0.0441(17) 0.0573(18) -0.0045(14) 0.0288(15) -0.0034(14)
N6 0.0508(18) 0.0450(17) 0.0543(18) -0.0033(14) 0.0210(14) 0.0002(14)
N7 0.061(2) 0.0524(19) 0.0534(18) -0.0012(15) 0.0263(16) 0.0082(15)
N8 0.0509(18) 0.0549(19) 0.0576(19) -0.0045(15) 0.0202(15) -0.0030(15)
O1 0.0410(13) 0.0452(14) 0.0585(15) 0.0008(11) 0.0146(11) -0.0077(11)
O2 0.0641(18) 0.0536(18) 0.0747(19) -0.0008(14) -0.0001(14) -0.0058(14)
O3 0.0754(19) 0.0581(17) 0.0524(16) 0.0020(14) 0.0055(14) -0.0083(15)
O4 0.154(4) 0.266(7) 0.060(2) -0.009(3) 0.024(3) 0.126(5)
O5 0.096(3) 0.092(3) 0.108(3) -0.022(2) 0.057(2) -0.037(2)
O6 0.0443(13) 0.0536(15) 0.0523(14) -0.0129(11) 0.0237(11) -0.0081(11)
F1 0.110(8) 0.096(7) 0.158(8) -0.062(6) 0.075(6) -0.036(6)
F2 0.46(3) 0.100(9) 0.46(3) -0.121(13) 0.41(3) -0.123(14)
F3 0.126(7) 0.125(8) 0.152(9) -0.048(7) 0.043(7) -0.066(6)
F4 0.187(13) 0.264(19) 0.105(7) 0.057(9) 0.012(8) -0.050(12)
F5 0.44(3) 0.27(2) 0.192(15) 0.022(13) 0.24(2) -0.01(2)
F6 0.088(7) 0.133(10) 0.52(3) 0.044(17) 0.138(14) -0.008(6)
F1' 0.37(3) 0.151(13) 0.117(11) -0.067(10) -0.068(15) 0.018(18)
F2' 0.159(17) 0.46(5) 0.23(3) 0.07(3) -0.082(18) -0.16(2)
F3' 0.111(12) 0.112(14) 0.38(3) 0.053(16) 0.097(17) 0.030(10)
F4' 0.43(4) 0.132(12) 0.48(5) 0.06(2) 0.42(4) 0.03(2)
F5' 0.225(18) 0.053(5) 0.204(15) -0.006(6) 0.177(14) -0.017(7)
F6' 0.149(9) 0.065(6) 0.155(10) 0.000(6) -0.003(8) 0.034(6)
P1 0.1229(13) 0.0720(9) 0.1091(12) -0.0047(8) 0.0696(11) -0.0202(9)
Zn1 0.0430(3) 0.0444(3) 0.0560(3) 0.0017(2) 0.0160(2) -0.0026(2)
Zn2 0.0448(3) 0.0445(3) 0.0546(3) -0.0022(2) 0.0210(2) -0.0012(2)
 
 
#----------------------------------------------------------------------------#
#                   MOLECULAR GEOMETRY                                       #
#----------------------------------------------------------------------------#
 
_geom_special_details
;
 All s.u.'s (except the s.u. in the dihedral angle between two l.s. planes)
 are estimated using the full covariance matrix.  The cell s.u.'s are taken
 into account individually in the estimation of s.u.'s in distances, angles
 and torsion angles; correlations between s.u.'s in cell parameters are only
 used when they are defined by crystal symmetry.  An approximate (isotropic)
 treatment of cell s.u.'s is used for estimating s.u.'s involving l.s. planes.
;
loop_
    _geom_bond_atom_site_label_1
    _geom_bond_atom_site_label_2
    _geom_bond_distance
    _geom_bond_site_symmetry_2
    _geom_bond_publ_flag
C1 N1 1.344(5) . ?
C1 C2 1.377(7) . ?
C1 H1 0.93 . ?
C1A O3 1.229(5) . ?
C1A O2 1.253(5) . ?
C1A C2A 1.518(6) . ?
C2 C3 1.364(9) . ?
C2 H2 0.93 . ?
C2A H2A 0.96 . ?
C2A H2B 0.96 . ?
C2A H2C 0.96 . ?
C3 C4 1.374(8) . ?
C3 H3 0.93 . ?
C4 C5 1.391(6) . ?
C4 H4 0.93 . ?
C5 N1 1.328(6) . ?
C5 C6 1.509(6) . ?
C6 N2 1.483(5) . ?
C6 H6A 0.97 . ?
C6 H6B 0.97 . ?
C7 N3 1.331(5) . ?
C7 C8 1.376(6) . ?
C7 H7 0.93 . ?
C8 C9 1.382(8) . ?
C8 H8 0.93 . ?
C9 C10 1.373(7) . ?
C9 H9 0.93 . ?
C10 C11 1.384(6) . ?
C10 H10 0.93 . ?
C11 N3 1.352(5) . ?
C11 C12 1.498(6) . ?
C12 N2 1.473(5) . ?
C12 H12A 0.97 . ?
C12 H12B 0.97 . ?
C13 N2 1.485(5) . ?
C13 C14 1.501(6) . ?
C13 H31A 0.97 . ?
C13 H31B 0.97 . ?
C14 C15 1.396(5) . ?
C14 C20 1.398(5) . ?
C15 C16 1.390(6) . ?
C15 H15 0.93 . ?
C16 C18 1.380(6) . ?
C16 C17 1.514(6) . ?
C17 H17A 0.96 . ?
C17 H17B 0.96 . ?
C17 H17C 0.96 . ?
C18 C19 1.390(6) . ?
C18 H18 0.93 . ?
C19 C20 1.405(5) . ?
C19 C21 1.495(6) . ?
C20 O1 1.355(4) . ?
C21 N5 1.496(5) . ?
C21 H21A 0.97 . ?
C21 H21B 0.97 . ?
C22 N4 1.344(5) . ?
C22 C23 1.381(6) . ?
C22 N7 1.403(5) . ?
C23 C24 1.365(7) . ?
C23 H23 0.93 . ?
C24 C25 1.387(7) . ?
C24 H24 0.93 . ?
C25 C26 1.379(6) . ?
C25 H25 0.93 . ?
C26 N4 1.348(5) . ?
C26 C27 1.501(6) . ?
C27 N5 1.481(5) . ?
C27 H27A 0.97 . ?
C27 H27B 0.97 . ?
C28 N6 1.341(5) . ?
C28 C29 1.387(6) . ?
C28 N8 1.397(5) . ?
C29 C30 1.356(6) . ?
C29 H29 0.93 . ?
C30 C31 1.382(7) . ?
C30 H30 0.93 . ?
C31 C32 1.375(6) . ?
C31 H31 0.93 . ?
C32 N6 1.348(5) . ?
C32 C33 1.509(6) . ?
C33 N5 1.472(5) . ?
C33 H33A 0.97 . ?
C33 H33B 0.97 . ?
C34 O4 1.204(6) . ?
C34 N7 1.373(5) . ?
C34 C35 1.511(6) . ?
C35 C36B 1.464(9) . ?
C35 C36C 1.467(9) . ?
C35 C36A 1.480(8) . ?
C36A H36A 0.96 . ?
C36A H36B 0.96 . ?
C36A H36C 0.96 . ?
C36B H36D 0.96 . ?
C36B H36E 0.96 . ?
C36B H36F 0.96 . ?
C36C H36G 0.96 . ?
C36C H36H 0.96 . ?
C36C H36I 0.96 . ?
C37 O5 1.211(6) . ?
C37 N8 1.371(5) . ?
C37 C38 1.538(6) . ?
C38 C39C 1.511(7) . ?
C38 C39B 1.520(7) . ?
C38 C39A 1.529(7) . ?
C39A H39G 0.96 . ?
C39A H39H 0.96 . ?
C39A H39I 0.96 . ?
C39B H39A 0.96 . ?
C39B H39B 0.96 . ?
C39B H39C 0.96 . ?
C39C H39D 0.96 . ?
C39C H39E 0.96 . ?
C39C H39F 0.96 . ?
N1 Zn1 2.057(3) . ?
N2 Zn1 2.233(3) . ?
N3 Zn1 2.102(3) . ?
N4 Zn2 2.322(3) . ?
N5 Zn2 2.136(3) . ?
N6 Zn2 2.336(3) . ?
N7 H7A 0.86 . ?
N8 H8A 0.86 . ?
O1 Zn1 1.954(3) . ?
O1 Zn2 2.120(2) . ?
O2 Zn1 2.003(3) . ?
O3 Zn2 2.133(3) . ?
O6 Zn2 1.945(2) . ?
O6 H6C 0.96 . ?
F1 P1 1.579(11) . ?
F2 P1 1.514(11) . ?
F3 P1 1.577(10) . ?
F4 P1 1.491(11) . ?
F5 P1 1.556(14) . ?
F6 P1 1.479(10) . ?
F1' P1 1.575(15) . ?
F2' P1 1.437(18) . ?
F3' P1 1.517(17) . ?
F4' P1 1.501(12) . ?
F5' P1 1.541(9) . ?
F6' P1 1.547(10) . ?
Zn1 Zn2 3.5422(7) . ?
 
loop_
    _geom_angle_atom_site_label_1
    _geom_angle_atom_site_label_2
    _geom_angle_atom_site_label_3
    _geom_angle
    _geom_angle_site_symmetry_1
    _geom_angle_site_symmetry_3
    _geom_angle_publ_flag
N1 C1 C2 121.8(5) . . ?
N1 C1 H1 119.1 . . ?
C2 C1 H1 119.1 . . ?
O3 C1A O2 126.1(4) . . ?
O3 C1A C2A 117.1(4) . . ?
O2 C1A C2A 116.8(4) . . ?
C3 C2 C1 119.1(5) . . ?
C3 C2 H2 120.5 . . ?
C1 C2 H2 120.5 . . ?
C1A C2A H2A 109.5 . . ?
C1A C2A H2B 109.5 . . ?
H2A C2A H2B 109.5 . . ?
C1A C2A H2C 109.5 . . ?
H2A C2A H2C 109.5 . . ?
H2B C2A H2C 109.5 . . ?
C2 C3 C4 119.9(5) . . ?
C2 C3 H3 120 . . ?
C4 C3 H3 120 . . ?
C3 C4 C5 118.1(5) . . ?
C3 C4 H4 121 . . ?
C5 C4 H4 121 . . ?
N1 C5 C4 122.3(4) . . ?
N1 C5 C6 117.7(3) . . ?
C4 C5 C6 119.8(4) . . ?
N2 C6 C5 113.1(3) . . ?
N2 C6 H6A 109 . . ?
C5 C6 H6A 109 . . ?
N2 C6 H6B 109 . . ?
C5 C6 H6B 109 . . ?
H6A C6 H6B 107.8 . . ?
N3 C7 C8 123.1(4) . . ?
N3 C7 H7 118.5 . . ?
C8 C7 H7 118.5 . . ?
C7 C8 C9 117.8(5) . . ?
C7 C8 H8 121.1 . . ?
C9 C8 H8 121.1 . . ?
C10 C9 C8 119.9(4) . . ?
C10 C9 H9 120 . . ?
C8 C9 H9 120 . . ?
C9 C10 C11 119.2(5) . . ?
C9 C10 H10 120.4 . . ?
C11 C10 H10 120.4 . . ?
N3 C11 C10 121.0(4) . . ?
N3 C11 C12 116.8(3) . . ?
C10 C11 C12 122.2(4) . . ?
N2 C12 C11 111.2(3) . . ?
N2 C12 H12A 109.4 . . ?
C11 C12 H12A 109.4 . . ?
N2 C12 H12B 109.4 . . ?
C11 C12 H12B 109.4 . . ?
H12A C12 H12B 108 . . ?
N2 C13 C14 112.3(3) . . ?
N2 C13 H31A 109.1 . . ?
C14 C13 H31A 109.1 . . ?
N2 C13 H31B 109.1 . . ?
C14 C13 H31B 109.1 . . ?
H31A C13 H31B 107.9 . . ?
C15 C14 C20 119.1(4) . . ?
C15 C14 C13 120.3(4) . . ?
C20 C14 C13 120.6(3) . . ?
C16 C15 C14 121.8(4) . . ?
C16 C15 H15 119.1 . . ?
C14 C15 H15 119.1 . . ?
C18 C16 C15 117.5(4) . . ?
C18 C16 C17 121.8(4) . . ?
C15 C16 C17 120.7(4) . . ?
C16 C17 H17A 109.5 . . ?
C16 C17 H17B 109.5 . . ?
H17A C17 H17B 109.5 . . ?
C16 C17 H17C 109.5 . . ?
H17A C17 H17C 109.5 . . ?
H17B C17 H17C 109.5 . . ?
C16 C18 C19 123.0(4) . . ?
C16 C18 H18 118.5 . . ?
C19 C18 H18 118.5 . . ?
C18 C19 C20 118.3(4) . . ?
C18 C19 C21 122.5(4) . . ?
C20 C19 C21 119.1(3) . . ?
O1 C20 C14 120.7(3) . . ?
O1 C20 C19 119.3(3) . . ?
C14 C20 C19 120.0(3) . . ?
C19 C21 N5 114.0(3) . . ?
C19 C21 H21A 108.7 . . ?
N5 C21 H21A 108.7 . . ?
C19 C21 H21B 108.7 . . ?
N5 C21 H21B 108.7 . . ?
H21A C21 H21B 107.6 . . ?
N4 C22 C23 122.1(4) . . ?
N4 C22 N7 114.3(3) . . ?
C23 C22 N7 123.6(4) . . ?
C24 C23 C22 119.0(4) . . ?
C24 C23 H23 120.5 . . ?
C22 C23 H23 120.5 . . ?
C23 C24 C25 120.1(4) . . ?
C23 C24 H24 119.9 . . ?
C25 C24 H24 119.9 . . ?
C26 C25 C24 117.7(4) . . ?
C26 C25 H25 121.1 . . ?
C24 C25 H25 121.1 . . ?
N4 C26 C25 122.8(4) . . ?
N4 C26 C27 116.0(3) . . ?
C25 C26 C27 121.1(4) . . ?
N5 C27 C26 112.9(3) . . ?
N5 C27 H27A 109 . . ?
C26 C27 H27A 109 . . ?
N5 C27 H27B 109 . . ?
C26 C27 H27B 109 . . ?
H27A C27 H27B 107.8 . . ?
N6 C28 C29 122.0(4) . . ?
N6 C28 N8 114.9(3) . . ?
C29 C28 N8 123.1(4) . . ?
C30 C29 C28 118.9(4) . . ?
C30 C29 H29 120.5 . . ?
C28 C29 H29 120.5 . . ?
C29 C30 C31 120.1(4) . . ?
C29 C30 H30 119.9 . . ?
C31 C30 H30 119.9 . . ?
C32 C31 C30 118.3(4) . . ?
C32 C31 H31 120.8 . . ?
C30 C31 H31 120.8 . . ?
N6 C32 C31 122.4(4) . . ?
N6 C32 C33 117.7(3) . . ?
C31 C32 C33 119.9(3) . . ?
N5 C33 C32 112.7(3) . . ?
N5 C33 H33A 109.1 . . ?
C32 C33 H33A 109.1 . . ?
N5 C33 H33B 109.1 . . ?
C32 C33 H33B 109.1 . . ?
H33A C33 H33B 107.8 . . ?
O4 C34 N7 121.3(4) . . ?
O4 C34 C35 120.2(4) . . ?
N7 C34 C35 118.4(4) . . ?
C36B C35 C36C 104.2(8) . . ?
C36B C35 C36A 107.7(7) . . ?
C36C C35 C36A 110.6(7) . . ?
C36B C35 C34 108.0(5) . . ?
C36C C35 C34 116.1(4) . . ?
C36A C35 C34 109.7(5) . . ?
C35 C36A H36A 109.5 . . ?
C35 C36A H36B 109.5 . . ?
H36A C36A H36B 109.5 . . ?
C35 C36A H36C 109.5 . . ?
H36A C36A H36C 109.5 . . ?
H36B C36A H36C 109.5 . . ?
C35 C36B H36D 109.5 . . ?
C35 C36B H36E 109.5 . . ?
H36D C36B H36E 109.5 . . ?
C35 C36B H36F 109.5 . . ?
H36D C36B H36F 109.5 . . ?
H36E C36B H36F 109.5 . . ?
C35 C36C H36G 109.5 . . ?
C35 C36C H36H 109.5 . . ?
H36G C36C H36H 109.5 . . ?
C35 C36C H36I 109.5 . . ?
H36G C36C H36I 109.5 . . ?
H36H C36C H36I 109.5 . . ?
O5 C37 N8 122.6(4) . . ?
O5 C37 C38 121.6(4) . . ?
N8 C37 C38 115.7(4) . . ?
C39C C38 C39B 109.3(5) . . ?
C39C C38 C39A 109.3(4) . . ?
C39B C38 C39A 109.4(4) . . ?
C39C C38 C37 109.6(4) . . ?
C39B C38 C37 110.3(4) . . ?
C39A C38 C37 109.0(4) . . ?
C38 C39A H39G 109.5 . . ?
C38 C39A H39H 109.5 . . ?
H39G C39A H39H 109.5 . . ?
C38 C39A H39I 109.5 . . ?
H39G C39A H39I 109.5 . . ?
H39H C39A H39I 109.5 . . ?
C38 C39B H39A 109.5 . . ?
C38 C39B H39B 109.5 . . ?
H39A C39B H39B 109.5 . . ?
C38 C39B H39C 109.5 . . ?
H39A C39B H39C 109.5 . . ?
H39B C39B H39C 109.5 . . ?
C38 C39C H39D 109.5 . . ?
C38 C39C H39E 109.5 . . ?
H39D C39C H39E 109.5 . . ?
C38 C39C H39F 109.5 . . ?
H39D C39C H39F 109.5 . . ?
H39E C39C H39F 109.5 . . ?
C5 N1 C1 118.8(4) . . ?
C5 N1 Zn1 117.2(3) . . ?
C1 N1 Zn1 123.7(3) . . ?
C12 N2 C6 110.0(3) . . ?
C12 N2 C13 112.9(3) . . ?
C6 N2 C13 111.3(3) . . ?
C12 N2 Zn1 107.7(2) . . ?
C6 N2 Zn1 106.5(2) . . ?
C13 N2 Zn1 108.2(2) . . ?
C7 N3 C11 119.0(3) . . ?
C7 N3 Zn1 124.2(3) . . ?
C11 N3 Zn1 116.6(3) . . ?
C22 N4 C26 118.2(3) . . ?
C22 N4 Zn2 129.9(2) . . ?
C26 N4 Zn2 110.1(2) . . ?
C33 N5 C27 109.5(3) . . ?
C33 N5 C21 109.4(3) . . ?
C27 N5 C21 111.1(3) . . ?
C33 N5 Zn2 107.1(2) . . ?
C27 N5 Zn2 109.0(2) . . ?
C21 N5 Zn2 110.6(2) . . ?
C28 N6 C32 118.3(3) . . ?
C28 N6 Zn2 131.4(2) . . ?
C32 N6 Zn2 107.8(2) . . ?
C34 N7 C22 125.4(4) . . ?
C34 N7 H7A 117.3 . . ?
C22 N7 H7A 117.3 . . ?
C37 N8 C28 126.6(4) . . ?
C37 N8 H8A 116.7 . . ?
C28 N8 H8A 116.7 . . ?
C20 O1 Zn1 121.0(2) . . ?
C20 O1 Zn2 118.2(2) . . ?
Zn1 O1 Zn2 120.75(12) . . ?
C1A O2 Zn1 130.2(3) . . ?
C1A O3 Zn2 136.7(3) . . ?
Zn2 O6 H6C 109.2 . . ?
F2' P1 F6 132.6(13) . . ?
F2' P1 F4 125.1(12) . . ?
F6 P1 F4 95.6(10) . . ?
F2' P1 F4' 89.7(14) . . ?
F6 P1 F4' 134.0(16) . . ?
F4 P1 F4' 38.4(16) . . ?
F2' P1 F2 59.9(12) . . ?
F6 P1 F2 95.7(11) . . ?
F4 P1 F2 96.7(11) . . ?
F4' P1 F2 91.4(9) . . ?
F2' P1 F3' 91.5(15) . . ?
F6 P1 F3' 101.8(10) . . ?
F4 P1 F3' 104.2(12) . . ?
F4' P1 F3' 92.8(11) . . ?
F2 P1 F3' 151.1(15) . . ?
F2' P1 F5' 84.5(12) . . ?
F6 P1 F5' 51.9(9) . . ?
F4 P1 F5' 147.5(10) . . ?
F4' P1 F5' 174.1(17) . . ?
F2 P1 F5' 86.7(6) . . ?
F3' P1 F5' 86.2(10) . . ?
F2' P1 F6' 89.2(14) . . ?
F6 P1 F6' 76.9(7) . . ?
F4 P1 F6' 76.2(9) . . ?
F4' P1 F6' 88.3(9) . . ?
F2 P1 F6' 29.5(13) . . ?
F3' P1 F6' 178.7(10) . . ?
F5' P1 F6' 92.8(8) . . ?
F2' P1 F5 49.1(11) . . ?
F6 P1 F5 90.8(9) . . ?
F4 P1 F5 173.6(11) . . ?
F4' P1 F5 135.2(17) . . ?
F2 P1 F5 82.5(11) . . ?
F3' P1 F5 74.5(12) . . ?
F5' P1 F5 39.0(10) . . ?
F6' P1 F5 105.2(9) . . ?
F2' P1 F1' 173.6(14) . . ?
F6 P1 F1' 42.0(10) . . ?
F4 P1 F1' 57.7(10) . . ?
F4' P1 F1' 94.4(14) . . ?
F2 P1 F1' 114.9(14) . . ?
F3' P1 F1' 93.3(11) . . ?
F5' P1 F1' 91.5(11) . . ?
F6' P1 F1' 85.9(8) . . ?
F5 P1 F1' 128.5(12) . . ?
F2' P1 F3 45.6(11) . . ?
F6 P1 F3 177.1(9) . . ?
F4 P1 F3 87.1(6) . . ?
F4' P1 F3 48.7(15) . . ?
F2 P1 F3 85.1(10) . . ?
F3' P1 F3 76.4(10) . . ?
F5' P1 F3 125.4(9) . . ?
F6' P1 F3 104.9(7) . . ?
F5 P1 F3 86.5(11) . . ?
F1' P1 F3 140.0(11) . . ?
F2' P1 F1 111.7(14) . . ?
F6 P1 F1 88.0(7) . . ?
F4 P1 F1 91.2(9) . . ?
F4' P1 F1 92.1(8) . . ?
F2 P1 F1 170.9(13) . . ?
F3' P1 F1 20.2(13) . . ?
F5' P1 F1 89.0(6) . . ?
F6' P1 F1 159.1(8) . . ?
F5 P1 F1 89.2(8) . . ?
F1' P1 F1 73.3(9) . . ?
F3 P1 F1 90.8(6) . . ?
O1 Zn1 O2 99.48(12) . . ?
O1 Zn1 N1 118.71(12) . . ?
O2 Zn1 N1 98.37(14) . . ?
O1 Zn1 N3 124.82(11) . . ?
O2 Zn1 N3 92.71(13) . . ?
N1 Zn1 N3 112.20(13) . . ?
O1 Zn1 N2 91.48(11) . . ?
O2 Zn1 N2 168.43(12) . . ?
N1 Zn1 N2 79.37(12) . . ?
N3 Zn1 N2 77.86(12) . . ?
O1 Zn1 Zn2 30.95(7) . . ?
O2 Zn1 Zn2 73.79(9) . . ?
N1 Zn1 Zn2 105.37(10) . . ?
N3 Zn1 Zn2 141.58(9) . . ?
N2 Zn1 Zn2 117.78(8) . . ?
O6 Zn2 O1 102.84(10) . . ?
O6 Zn2 O3 99.36(12) . . ?
O1 Zn2 O3 87.91(11) . . ?
O6 Zn2 N5 162.34(12) . . ?
O1 Zn2 N5 90.65(11) . . ?
O3 Zn2 N5 92.40(12) . . ?
O6 Zn2 N4 90.81(10) . . ?
O1 Zn2 N4 88.66(10) . . ?
O3 Zn2 N4 169.77(11) . . ?
N5 Zn2 N4 78.00(11) . . ?
O6 Zn2 N6 93.50(10) . . ?
O1 Zn2 N6 161.27(10) . . ?
O3 Zn2 N6 80.36(11) . . ?
N5 Zn2 N6 75.44(11) . . ?
N4 Zn2 N6 100.35(11) . . ?
O6 Zn2 Zn1 86.51(8) . . ?
O1 Zn2 Zn1 28.30(7) . . ?
O3 Zn2 Zn1 67.69(8) . . ?
N5 Zn2 Zn1 110.26(8) . . ?
N4 Zn2 Zn1 112.09(7) . . ?
N6 Zn2 Zn1 147.56(8) . . ?
 
loop_
    _geom_hbond_atom_site_label_D
    _geom_hbond_atom_site_label_H
    _geom_hbond_atom_site_label_A
    _geom_hbond_distance_DH
    _geom_hbond_distance_HA
    _geom_hbond_distance_DA
    _geom_hbond_angle_DHA
    _geom_hbond_site_symmetry_A
N7 H7A O6 0.86 2.03 2.810(4) 149.5 .
N8 H8A O6 0.86 2.06 2.875(4) 159 .
 
#===END
 
data_851sb5
 
_audit_creation_date                    2014-04-22T09:56:25-00:00
_audit_creation_method                  'WinGX routine CIF_UPDATE'
_audit_conform_dict_name                cif_core.dic
_audit_conform_dict_version             2.4
_audit_conform_dict_location            ftp://ftp.iucr.org/pub/cif_core.dic
_publ_requested_category                FM
 
#----------------------------------------------------------------------------#
#                   CHEMICAL INFORMATION                                     #
#----------------------------------------------------------------------------#
 
_chemical_name_systematic
;
 ?
;
_chemical_formula_moiety                'C37 H39 N6 O5 Zn2, F6 P'
_chemical_formula_sum                   'C37 H39 F6 N6 O5 P Zn2'
_chemical_formula_weight                923.45
_chemical_compound_source               'synthesis as described'
 
#----------------------------------------------------------------------------#
#                   UNIT CELL INFORMATION                                    #
#----------------------------------------------------------------------------#
 
_symmetry_cell_setting                  triclinic
_symmetry_space_group_name_H-M          'P -1'
_symmetry_space_group_name_Hall         '-P 1'
_symmetry_Int_Tables_number             2
loop_
    _symmetry_equiv_pos_as_xyz
'x, y, z'
'-x, -y, -z'
 
_cell_length_a                          10.2562(4)
_cell_length_b                          12.5876(5)
_cell_length_c                          16.7528(7)
_cell_angle_alpha                       89.561(3)
_cell_angle_beta                        74.354(3)
_cell_angle_gamma                       74.696(3)
_cell_volume                            2004.11(14)
_cell_formula_units_Z                   2
_cell_measurement_temperature           293(2)
_cell_measurement_reflns_used           7794
_cell_measurement_theta_min             3.646
_cell_measurement_theta_max             62.159
_cell_measurement_wavelength            1.5418
 
#----------------------------------------------------------------------------#
#                   CRYSTAL INFORMATION                                      #
#----------------------------------------------------------------------------#
 
_exptl_crystal_description              prism
_exptl_crystal_colour                   colourless
_exptl_crystal_size_max                 0.2
_exptl_crystal_size_mid                 0.1
_exptl_crystal_size_min                 0.1
_exptl_crystal_density_diffrn           1.53
_exptl_crystal_density_method           'not measured'
_exptl_crystal_F_000                    944
_exptl_special_details
;
 ?
;
 
#----------------------------------------------------------------------------#
#                   ABSORPTION CORRECTION                                    #
#----------------------------------------------------------------------------#
 
_exptl_absorpt_coefficient_mu           2.531
_exptl_absorpt_correction_type          multi-scan
_exptl_absorpt_process_details
;
        CrysAlisPro, Agilent Technologies,
        Version 1.171.36.20 (release 27-06-2012 CrysAlis171 .NET)
        (compiled Jul 11 2012,15:38:31)
        Empirical absorption correction using spherical harmonics,
 implemented in SCALE3 ABSPACK scaling algorithm.
;
_exptl_absorpt_correction_T_min         0.92608
_exptl_absorpt_correction_T_max         1
 
#----------------------------------------------------------------------------#
#                   DATA COLLECTION                                          #
#----------------------------------------------------------------------------#
 
_diffrn_ambient_temperature             293(2)
_diffrn_radiation_wavelength            1.5418
_diffrn_radiation_type                  CuK\a
_diffrn_radiation_monochromator         graphite
_diffrn_radiation_probe                 x-ray
_diffrn_detector_area_resol_mean        16.0696
_diffrn_orient_matrix_ub_11             -0.0983862
_diffrn_orient_matrix_ub_12             -0.0220191
_diffrn_orient_matrix_ub_13             0.0819193
_diffrn_orient_matrix_ub_21             -0.0323063
_diffrn_orient_matrix_ub_22             0.1213979
_diffrn_orient_matrix_ub_23             0.0314471
_diffrn_orient_matrix_ub_31             -0.1247086
_diffrn_orient_matrix_ub_32             0.0308825
_diffrn_orient_matrix_ub_33             -0.0382466
_diffrn_measurement_device_type         'Xcalibur, Sapphire3, Gemini ultra'
_diffrn_measurement_method              '\w scans'
_diffrn_reflns_av_R_equivalents         0.0222
_diffrn_reflns_av_unetI/netI            0.0222
_diffrn_reflns_number                   17469
_diffrn_reflns_limit_h_min              -11
_diffrn_reflns_limit_h_max              10
_diffrn_reflns_limit_k_min              -14
_diffrn_reflns_limit_k_max              14
_diffrn_reflns_limit_l_min              -19
_diffrn_reflns_limit_l_max              17
_diffrn_reflns_theta_min                3.65
_diffrn_reflns_theta_max                62.25
_diffrn_reflns_theta_full               62.25
_diffrn_measured_fraction_theta_full
                                        0.993
_diffrn_measured_fraction_theta_max
                                        0.993
_reflns_number_total                    6308
_reflns_number_gt                       5477
_reflns_threshold_expression            >2\s(I)
 
#----------------------------------------------------------------------------#
#                   COMPUTER PROGRAMS USED                                   #
#----------------------------------------------------------------------------#
 
_computing_data_collection
;
        CrysAlisPro, Agilent Technologies,
        Version 1.171.36.20 (release 27-06-2012 CrysAlis171 .NET)
        (compiled Jul 11 2012,15:38:31)
;
_computing_cell_refinement
;
        CrysAlisPro, Agilent Technologies,
        Version 1.171.36.20 (release 27-06-2012 CrysAlis171 .NET)
        (compiled Jul 11 2012,15:38:31)
;
_computing_data_reduction
;
        CrysAlisPro, Agilent Technologies,
        Version 1.171.36.20 (release 27-06-2012 CrysAlis171 .NET)
        (compiled Jul 11 2012,15:38:31)
;
_computing_structure_refinement         'SHELXL-97 (Sheldrick, 2008)'
_computing_molecular_graphics           'Ortep-3 for Windows (Farrugia, 1997)'
_computing_publication_material
                                   'WinGX publication routines (Farrugia, 1999)'
 
#----------------------------------------------------------------------------#
#                   STRUCTURE SOLUTION
#----------------------------------------------------------------------------#
 
_atom_sites_solution_primary            direct
_atom_sites_solution_secondary          difmap
_atom_sites_solution_hydrogens          geom
 
#----------------------------------------------------------------------------#
#                   REFINEMENT INFORMATION                                   #
#----------------------------------------------------------------------------#
 
_refine_special_details
;
 Refinement of F^2^ against ALL reflections.  The weighted R-factor wR and
 goodness of fit S are based on F^2^, conventional R-factors R are based
 on F, with F set to zero for negative F^2^. The threshold expression of
 F^2^ > 2\s(F^2^) is used only for calculating R-factors(gt) etc. and is
 not relevant to the choice of reflections for refinement.  R-factors based
 on F^2^ are statistically about twice as large as those based on F, and R-
 factors based on ALL data will be even larger.
;
_refine_ls_structure_factor_coef        Fsqd
_refine_ls_matrix_type                  full
_refine_ls_weighting_scheme             calc
_refine_ls_weighting_details
         'calc w=1/[\s^2^(Fo^2^)+(0.0477P)^2^+0.3861P] where P=(Fo^2^+2Fc^2^)/3'
_refine_ls_hydrogen_treatment           constr
_refine_ls_extinction_method            none
_refine_ls_number_reflns                6308
_refine_ls_number_parameters            570
_refine_ls_number_restraints            15
_refine_ls_R_factor_all                 0.0362
_refine_ls_R_factor_gt                  0.0303
_refine_ls_wR_factor_ref                0.0847
_refine_ls_wR_factor_gt                 0.0792
_refine_ls_goodness_of_fit_ref          1.026
_refine_ls_restrained_S_all             1.026
_refine_ls_shift/su_max                 0.001
_refine_ls_shift/su_mean                0
_refine_diff_density_max                0.371
_refine_diff_density_min                -0.251
_refine_diff_density_rms                0.04
 
#----------------------------------------------------------------------------#
#                   ATOMIC TYPES, COORDINATES AND THERMAL PARAMETERS         #
#----------------------------------------------------------------------------#
 
loop_
    _atom_type_symbol
    _atom_type_description
    _atom_type_scat_dispersion_real
    _atom_type_scat_dispersion_imag
    _atom_type_scat_source
C C 0.0181 0.0091 'International Tables Vol C Tables 4.2.6.8 and 6.1.1.4'
H H 0 0 'International Tables Vol C Tables 4.2.6.8 and 6.1.1.4'
N N 0.0311 0.018 'International Tables Vol C Tables 4.2.6.8 and 6.1.1.4'
O O 0.0492 0.0322 'International Tables Vol C Tables 4.2.6.8 and 6.1.1.4'
F F 0.0727 0.0534 'International Tables Vol C Tables 4.2.6.8 and 6.1.1.4'
Zn Zn -1.5491 0.6778 'International Tables Vol C Tables 4.2.6.8 and 6.1.1.4'
P P 0.2955 0.4335 'International Tables Vol C Tables 4.2.6.8 and 6.1.1.4'
 
loop_
    _atom_site_label
    _atom_site_type_symbol
    _atom_site_fract_x
    _atom_site_fract_y
    _atom_site_fract_z
    _atom_site_U_iso_or_equiv
    _atom_site_adp_type
    _atom_site_occupancy
    _atom_site_symmetry_multiplicity
    _atom_site_calc_flag
    _atom_site_refinement_flags
    _atom_site_disorder_assembly
    _atom_site_disorder_group
C1 C 0.4565(2) 0.4401(2) 0.70897(16) 0.0629(6) Uani 1 1 d . . .
H1 H 0.4489 0.4971 0.7464 0.076 Uiso 1 1 calc R . .
C2 C 0.4398(3) 0.4658(3) 0.63168(18) 0.0745(7) Uani 1 1 d . . .
H2 H 0.4193 0.5388 0.6177 0.089 Uiso 1 1 calc R . .
C3 C 0.4541(3) 0.3816(3) 0.57573(18) 0.0773(7) Uani 1 1 d . . .
H3 H 0.4444 0.3968 0.5229 0.093 Uiso 1 1 calc R . .
C4 C 0.4829(3) 0.2746(3) 0.59859(16) 0.0698(7) Uani 1 1 d . . .
H4 H 0.4935 0.2164 0.5614 0.084 Uiso 1 1 calc R . .
C5 C 0.4958(2) 0.2548(2) 0.67808(15) 0.0592(5) Uani 1 1 d . . .
C6 C 0.5195(3) 0.1412(2) 0.70991(17) 0.0663(6) Uani 1 1 d . . .
H6A H 0.4302 0.1315 0.7425 0.08 Uiso 1 1 calc R . .
H6B H 0.5565 0.0866 0.6632 0.08 Uiso 1 1 calc R . .
C7 C 0.3290(3) 0.2721(2) 0.97211(17) 0.0694(6) Uani 1 1 d . . .
H7 H 0.3151 0.3477 0.9804 0.083 Uiso 1 1 calc R . .
C8 C 0.2389(3) 0.2222(3) 1.0250(2) 0.0899(9) Uani 1 1 d . . .
H8 H 0.1659 0.2628 1.0686 0.108 Uiso 1 1 calc R . .
C9 C 0.2595(3) 0.1110(3) 1.0117(2) 0.0984(10) Uani 1 1 d . . .
H9 H 0.2 0.0752 1.0464 0.118 Uiso 1 1 calc R . .
C10 C 0.3679(3) 0.0526(3) 0.9471(2) 0.0867(8) Uani 1 1 d . . .
H10 H 0.382 -0.0228 0.9374 0.104 Uiso 1 1 calc R . .
C11 C 0.4564(3) 0.1077(2) 0.89620(17) 0.0670(6) Uani 1 1 d . . .
C12 C 0.5831(3) 0.0487(2) 0.82714(17) 0.0696(6) Uani 1 1 d . . .
H12A H 0.6628 0.021 0.8495 0.084 Uiso 1 1 calc R . .
H12B H 0.5641 -0.0138 0.8036 0.084 Uiso 1 1 calc R . .
C13 C 0.7666(3) 0.0796(2) 0.70988(16) 0.0639(6) Uani 1 1 d . . .
H13A H 0.7786 0.0078 0.6839 0.077 Uiso 1 1 calc R . .
H13B H 0.8291 0.0703 0.7453 0.077 Uiso 1 1 calc R . .
C14 C 0.8069(2) 0.15556(19) 0.64356(15) 0.0582(5) Uani 1 1 d . . .
C15 C 0.8433(3) 0.1235(2) 0.55959(16) 0.0645(6) Uani 1 1 d . . .
H15 H 0.8444 0.0524 0.5441 0.077 Uiso 1 1 calc R . .
C16 C 0.8780(3) 0.1934(2) 0.49816(16) 0.0677(6) Uani 1 1 d . . .
C17 C 0.9151(4) 0.1573(3) 0.40727(18) 0.0891(9) Uani 1 1 d . . .
H17A H 0.9128 0.082 0.4017 0.134 Uiso 1 1 calc R . .
H17B H 1.0078 0.1632 0.3799 0.134 Uiso 1 1 calc R . .
H17C H 0.8483 0.2035 0.3824 0.134 Uiso 1 1 calc R . .
C18 C 0.8737(3) 0.2990(2) 0.52376(16) 0.0652(6) Uani 1 1 d . . .
H18 H 0.8955 0.3477 0.4835 0.078 Uiso 1 1 calc R . .
C19 C 0.8386(2) 0.33514(19) 0.60632(15) 0.0566(5) Uani 1 1 d . . .
C20 C 0.8055(2) 0.26293(18) 0.66773(14) 0.0530(5) Uani 1 1 d . . .
C21 C 0.8343(2) 0.45061(19) 0.63254(15) 0.0596(5) Uani 1 1 d . . .
H21A H 0.8527 0.4921 0.5837 0.071 Uiso 1 1 calc R . .
H21B H 0.7409 0.4871 0.6675 0.071 Uiso 1 1 calc R . .
C28 C 1.0670(3) 0.4783(2) 0.88223(18) 0.0717(7) Uani 1 1 d . . .
H28 H 1.0617 0.4231 0.9191 0.086 Uiso 1 1 calc R . .
C29 C 1.1416(3) 0.5515(3) 0.8913(2) 0.0828(8) Uani 1 1 d . . .
H29 H 1.1856 0.5461 0.9336 0.099 Uiso 1 1 calc R . .
C30 C 1.1493(3) 0.6320(2) 0.8368(2) 0.0818(8) Uani 1 1 d . . .
H30 H 1.1991 0.6825 0.8413 0.098 Uiso 1 1 calc R . .
C31 C 1.0835(3) 0.6380(2) 0.77535(19) 0.0712(7) Uani 1 1 d . . .
H31 H 1.0886 0.6924 0.7377 0.085 Uiso 1 1 calc R . .
C32 C 1.0094(2) 0.56267(19) 0.76938(16) 0.0582(5) Uani 1 1 d . . .
C33 C 0.9325(3) 0.56398(19) 0.70478(16) 0.0617(6) Uani 1 1 d . . .
H33A H 0.8349 0.6057 0.7272 0.074 Uiso 1 1 calc R . .
H33B H 0.9741 0.6001 0.657 0.074 Uiso 1 1 calc R . .
C22 C 1.1130(3) 0.1431(2) 0.7463(2) 0.0806(8) Uani 1 1 d . . .
H22 H 1.0802 0.1271 0.8012 0.097 Uiso 1 1 calc R . .
C23 C 1.1981(3) 0.0591(3) 0.6899(3) 0.0981(11) Uani 1 1 d . . .
H23 H 1.2251 -0.0124 0.7061 0.118 Uiso 1 1 calc R . .
C24 C 1.2429(3) 0.0823(3) 0.6087(3) 0.1006(11) Uani 1 1 d . . .
H24 H 1.3 0.026 0.5691 0.121 Uiso 1 1 calc R . .
C25 C 1.2038(3) 0.1887(3) 0.5854(2) 0.0851(9) Uani 1 1 d . . .
H25 H 1.2324 0.2056 0.5304 0.102 Uiso 1 1 calc R . .
C26 C 1.1198(2) 0.2703(2) 0.64769(18) 0.0662(6) Uani 1 1 d . . .
C27 C 1.0824(2) 0.3903(2) 0.63006(17) 0.0688(6) Uani 1 1 d . . .
H27A H 1.1495 0.4245 0.6429 0.083 Uiso 1 1 calc R . .
H27B H 1.0897 0.3961 0.5713 0.083 Uiso 1 1 calc R . .
C3A C 0.5781(2) 0.51179(18) 0.88099(13) 0.0525(5) Uani 1 1 d . . .
C4A C 0.4819(3) 0.6249(2) 0.91121(17) 0.0656(6) Uani 1 1 d . . .
H4A1 H 0.3868 0.6202 0.9318 0.098 Uiso 1 1 calc R . .
H4A2 H 0.4881 0.6726 0.8661 0.098 Uiso 1 1 calc R . .
H4A3 H 0.5092 0.6542 0.955 0.098 Uiso 1 1 calc R . .
C1A C 0.8197(2) 0.21962(19) 0.93092(15) 0.0585(5) Uani 1 1 d . . .
C2A C 0.8673(4) 0.1533(2) 0.9978(2) 0.0855(9) Uani 1 1 d . . .
H2A1 H 0.9419 0.177 1.0099 0.128 Uiso 1 1 calc R . .
H2A2 H 0.9007 0.0764 0.9791 0.128 Uiso 1 1 calc R . .
H2A3 H 0.7898 0.1639 1.047 0.128 Uiso 1 1 calc R . .
N1 N 0.48325(19) 0.33677(16) 0.73240(12) 0.0568(4) Uani 1 1 d . . .
N3 N 0.4357(2) 0.21625(17) 0.90935(12) 0.0603(5) Uani 1 1 d . . .
N2 N 0.6184(2) 0.12274(16) 0.76171(12) 0.0584(4) Uani 1 1 d . . .
N5 N 0.93921(19) 0.45084(15) 0.67855(12) 0.0570(4) Uani 1 1 d . . .
N6 N 1.00204(19) 0.48342(16) 0.82273(13) 0.0600(5) Uani 1 1 d . . .
N4 N 1.0746(2) 0.24785(17) 0.72611(15) 0.0668(5) Uani 1 1 d . . .
O2A O 0.72305(17) 0.19840(14) 0.90815(11) 0.0641(4) Uani 1 1 d . . .
O1 O 0.77145(15) 0.29563(12) 0.74797(9) 0.0539(3) Uani 1 1 d . . .
O2B O 0.52135(16) 0.43373(13) 0.88719(10) 0.0595(4) Uani 1 1 d . . .
O3B O 0.70648(16) 0.50342(13) 0.85197(11) 0.0642(4) Uani 1 1 d . . .
O3A O 0.88193(19) 0.29197(14) 0.90430(11) 0.0677(4) Uani 1 1 d . . .
F1 F 0.6298(11) 0.6981(7) 0.5870(4) 0.125(3) Uani 0.530(11) 1 d PD A 1
F2 F 0.5634(9) 0.6868(5) 0.7207(4) 0.136(4) Uani 0.530(11) 1 d PD A 1
F3 F 0.6784(6) 0.8041(7) 0.6717(8) 0.155(3) Uani 0.530(11) 1 d PD A 1
F4 F 0.5256(13) 0.8739(7) 0.6029(5) 0.181(5) Uani 0.530(11) 1 d PD A 1
F5 F 0.4023(8) 0.7603(9) 0.6586(10) 0.191(5) Uani 0.530(11) 1 d PD A 1
F6 F 0.4576(8) 0.8685(6) 0.7376(5) 0.139(4) Uani 0.530(11) 1 d PD A 1
F1' F 0.6666(11) 0.7047(7) 0.6023(7) 0.157(5) Uani 0.470(11) 1 d PD A 2
F2' F 0.5056(17) 0.6804(7) 0.7107(6) 0.186(6) Uani 0.470(11) 1 d PD A 2
F3' F 0.6420(12) 0.7750(9) 0.7268(8) 0.156(4) Uani 0.470(11) 1 d PD A 2
F4' F 0.5860(16) 0.8828(7) 0.6317(7) 0.206(7) Uani 0.470(11) 1 d PD A 2
F5' F 0.4407(12) 0.7898(10) 0.6171(7) 0.179(6) Uani 0.470(11) 1 d PD A 2
F6' F 0.4228(10) 0.8615(7) 0.7393(4) 0.152(5) Uani 0.470(11) 1 d PD A 2
Zn1 Zn 0.59367(3) 0.28158(2) 0.829827(18) 0.05225(10) Uani 1 1 d . . .
Zn2 Zn 0.88310(3) 0.37280(2) 0.799606(19) 0.05377(10) Uani 1 1 d . . .
P1 P 0.54159(9) 0.78216(6) 0.66687(5) 0.0831(2) Uani 1 1 d . . .
 
loop_
    _atom_site_aniso_label
    _atom_site_aniso_U_11
    _atom_site_aniso_U_22
    _atom_site_aniso_U_33
    _atom_site_aniso_U_23
    _atom_site_aniso_U_13
    _atom_site_aniso_U_12
C1 0.0542(12) 0.0685(15) 0.0660(15) -0.0005(12) -0.0179(11) -0.0150(11)
C2 0.0680(15) 0.0814(18) 0.0768(17) 0.0146(14) -0.0243(13) -0.0206(13)
C3 0.0701(16) 0.106(2) 0.0642(16) 0.0132(15) -0.0242(13) -0.0318(15)
C4 0.0623(14) 0.0937(19) 0.0611(14) -0.0050(13) -0.0195(11) -0.0313(13)
C5 0.0460(11) 0.0739(15) 0.0632(14) -0.0023(11) -0.0156(10) -0.0250(10)
C6 0.0666(14) 0.0717(15) 0.0711(15) -0.0052(12) -0.0226(12) -0.0330(12)
C7 0.0545(13) 0.0837(17) 0.0720(16) 0.0077(13) -0.0150(12) -0.0250(12)
C8 0.0609(15) 0.116(3) 0.088(2) 0.0142(18) -0.0075(14) -0.0305(16)
C9 0.0762(19) 0.123(3) 0.103(2) 0.034(2) -0.0140(18) -0.0524(19)
C10 0.0850(19) 0.088(2) 0.103(2) 0.0237(17) -0.0267(18) -0.0494(16)
C11 0.0673(14) 0.0742(16) 0.0727(16) 0.0134(13) -0.0252(12) -0.0360(12)
C12 0.0805(16) 0.0590(14) 0.0769(16) 0.0068(12) -0.0220(13) -0.0317(12)
C13 0.0632(14) 0.0546(13) 0.0715(15) -0.0042(11) -0.0152(11) -0.0151(11)
C14 0.0513(12) 0.0570(13) 0.0631(14) -0.0043(10) -0.0125(10) -0.0126(10)
C15 0.0631(13) 0.0590(13) 0.0678(15) -0.0094(12) -0.0151(11) -0.0135(11)
C16 0.0656(14) 0.0728(16) 0.0597(14) -0.0078(12) -0.0134(11) -0.0140(12)
C17 0.105(2) 0.090(2) 0.0648(17) -0.0113(15) -0.0134(15) -0.0237(17)
C18 0.0635(14) 0.0706(15) 0.0601(14) 0.0028(12) -0.0139(11) -0.0189(11)
C19 0.0489(11) 0.0598(13) 0.0607(13) -0.0004(10) -0.0143(10) -0.0147(10)
C20 0.0420(10) 0.0567(12) 0.0592(13) -0.0034(10) -0.0125(9) -0.0129(9)
C21 0.0592(13) 0.0589(13) 0.0639(14) 0.0071(11) -0.0200(11) -0.0186(10)
C28 0.0663(14) 0.0741(16) 0.0869(18) 0.0113(14) -0.0339(14) -0.0271(12)
C29 0.0769(17) 0.090(2) 0.100(2) 0.0057(17) -0.0439(16) -0.0331(15)
C30 0.0717(16) 0.0774(18) 0.110(2) -0.0036(16) -0.0309(16) -0.0371(14)
C31 0.0702(15) 0.0622(15) 0.0884(18) 0.0049(13) -0.0222(14) -0.0296(12)
C32 0.0489(11) 0.0529(12) 0.0724(15) 0.0005(11) -0.0125(10) -0.0175(10)
C33 0.0668(14) 0.0521(12) 0.0713(15) 0.0079(11) -0.0203(12) -0.0239(11)
C22 0.0599(14) 0.0637(16) 0.117(2) 0.0038(15) -0.0324(15) -0.0063(12)
C23 0.0741(19) 0.0641(18) 0.153(4) -0.009(2) -0.042(2) -0.0022(15)
C24 0.0617(16) 0.076(2) 0.151(4) -0.038(2) -0.0200(19) -0.0041(15)
C25 0.0545(14) 0.086(2) 0.107(2) -0.0232(17) -0.0101(14) -0.0172(14)
C26 0.0400(11) 0.0671(15) 0.0889(19) -0.0109(13) -0.0133(11) -0.0145(10)
C27 0.0523(12) 0.0762(16) 0.0746(16) -0.0035(13) -0.0053(11) -0.0242(12)
C3A 0.0519(12) 0.0578(13) 0.0497(11) -0.0021(9) -0.0181(9) -0.0141(10)
C4A 0.0604(13) 0.0608(14) 0.0743(15) -0.0096(12) -0.0218(12) -0.0109(11)
C1A 0.0588(13) 0.0522(12) 0.0665(14) 0.0011(10) -0.0226(11) -0.0132(10)
C2A 0.102(2) 0.0745(18) 0.107(2) 0.0313(16) -0.0596(19) -0.0385(16)
N1 0.0501(10) 0.0626(12) 0.0601(11) -0.0014(9) -0.0171(8) -0.0175(8)
N3 0.0536(10) 0.0692(12) 0.0656(12) 0.0073(9) -0.0179(9) -0.0278(9)
N2 0.0608(11) 0.0561(10) 0.0639(11) 0.0021(9) -0.0183(9) -0.0244(9)
N5 0.0494(10) 0.0532(10) 0.0682(11) 0.0010(9) -0.0126(8) -0.0174(8)
N6 0.0499(10) 0.0606(11) 0.0751(13) 0.0045(10) -0.0210(9) -0.0204(8)
N4 0.0477(10) 0.0569(12) 0.0941(16) -0.0015(10) -0.0210(10) -0.0096(9)
O2A 0.0616(9) 0.0683(10) 0.0717(10) 0.0083(8) -0.0266(8) -0.0252(8)
O1 0.0490(8) 0.0601(9) 0.0550(8) -0.0033(7) -0.0113(6) -0.0217(6)
O2B 0.0547(8) 0.0584(9) 0.0646(9) -0.0075(7) -0.0101(7) -0.0202(7)
O3B 0.0502(9) 0.0574(9) 0.0828(11) -0.0056(8) -0.0137(8) -0.0155(7)
O3A 0.0736(10) 0.0684(10) 0.0778(11) 0.0163(8) -0.0346(9) -0.0339(9)
F1 0.177(6) 0.089(4) 0.092(3) -0.022(3) -0.046(4) 0.003(4)
F2 0.150(5) 0.113(6) 0.094(3) 0.026(3) -0.020(3) 0.036(5)
F3 0.106(4) 0.137(6) 0.224(9) -0.014(7) -0.045(5) -0.040(3)
F4 0.236(10) 0.098(5) 0.139(5) 0.026(4) -0.039(5) 0.060(6)
F5 0.119(5) 0.168(7) 0.318(15) -0.021(9) -0.101(8) -0.048(4)
F6 0.113(4) 0.115(5) 0.174(8) -0.086(5) -0.051(4) 0.006(3)
F1' 0.179(8) 0.107(6) 0.126(7) -0.009(4) -0.024(6) 0.044(6)
F2' 0.316(17) 0.122(7) 0.152(7) 0.020(5) -0.052(8) -0.129(11)
F3' 0.152(7) 0.144(7) 0.180(9) -0.027(6) -0.104(7) 0.009(5)
F4' 0.361(18) 0.083(5) 0.189(9) 0.024(5) -0.059(9) -0.101(9)
F5' 0.197(10) 0.207(12) 0.148(7) -0.046(7) -0.127(8) 0.001(8)
F6' 0.116(5) 0.186(10) 0.103(5) -0.025(5) -0.037(4) 0.052(5)
Zn1 0.04827(16) 0.05484(18) 0.05685(18) -0.00111(12) -0.01313(12) -0.02082(12)
Zn2 0.04623(16) 0.05340(18) 0.06577(19) 0.00335(13) -0.01780(13) -0.01814(12)
P1 0.0970(5) 0.0561(4) 0.0946(5) -0.0070(4) -0.0414(4) -0.0025(4)
 
 
#----------------------------------------------------------------------------#
#                   MOLECULAR GEOMETRY                                       #
#----------------------------------------------------------------------------#
 
_geom_special_details
;
 All s.u.'s (except the s.u. in the dihedral angle between two l.s. planes)
 are estimated using the full covariance matrix.  The cell s.u.'s are taken
 into account individually in the estimation of s.u.'s in distances, angles
 and torsion angles; correlations between s.u.'s in cell parameters are only
 used when they are defined by crystal symmetry.  An approximate (isotropic)
 treatment of cell s.u.'s is used for estimating s.u.'s involving l.s. planes.
;
loop_
    _geom_bond_atom_site_label_1
    _geom_bond_atom_site_label_2
    _geom_bond_distance
    _geom_bond_site_symmetry_2
    _geom_bond_publ_flag
C1 N1 1.335(3) . ?
C1 C2 1.377(4) . ?
C1 H1 0.93 . ?
C2 C3 1.372(4) . ?
C2 H2 0.93 . ?
C3 C4 1.376(4) . ?
C3 H3 0.93 . ?
C4 C5 1.388(4) . ?
C4 H4 0.93 . ?
C5 N1 1.338(3) . ?
C5 C6 1.504(4) . ?
C6 N2 1.478(3) . ?
C6 H6A 0.97 . ?
C6 H6B 0.97 . ?
C7 N3 1.335(3) . ?
C7 C8 1.375(4) . ?
C7 H7 0.93 . ?
C8 C9 1.370(5) . ?
C8 H8 0.93 . ?
C9 C10 1.371(5) . ?
C9 H9 0.93 . ?
C10 C11 1.392(4) . ?
C10 H10 0.93 . ?
C11 N3 1.337(3) . ?
C11 C12 1.507(4) . ?
C12 N2 1.466(3) . ?
C12 H12A 0.97 . ?
C12 H12B 0.97 . ?
C13 N2 1.490(3) . ?
C13 C14 1.504(4) . ?
C13 H13A 0.97 . ?
C13 H13B 0.97 . ?
C14 C15 1.388(4) . ?
C14 C20 1.409(3) . ?
C15 C16 1.384(4) . ?
C15 H15 0.93 . ?
C16 C18 1.386(4) . ?
C16 C17 1.509(4) . ?
C17 H17A 0.96 . ?
C17 H17B 0.96 . ?
C17 H17C 0.96 . ?
C18 C19 1.380(3) . ?
C18 H18 0.93 . ?
C19 C20 1.400(3) . ?
C19 C21 1.508(3) . ?
C20 O1 1.333(3) . ?
C21 N5 1.484(3) . ?
C21 H21A 0.97 . ?
C21 H21B 0.97 . ?
C28 N6 1.333(3) . ?
C28 C29 1.375(4) . ?
C28 H28 0.93 . ?
C29 C30 1.363(4) . ?
C29 H29 0.93 . ?
C30 C31 1.366(4) . ?
C30 H30 0.93 . ?
C31 C32 1.382(3) . ?
C31 H31 0.93 . ?
C32 N6 1.338(3) . ?
C32 C33 1.499(3) . ?
C33 N5 1.472(3) . ?
C33 H33A 0.97 . ?
C33 H33B 0.97 . ?
C22 N4 1.341(4) . ?
C22 C23 1.363(5) . ?
C22 H22 0.93 . ?
C23 C24 1.369(6) . ?
C23 H23 0.93 . ?
C24 C25 1.379(5) . ?
C24 H24 0.93 . ?
C25 C26 1.396(4) . ?
C25 H25 0.93 . ?
C26 N4 1.325(4) . ?
C26 C27 1.505(4) . ?
C27 N5 1.474(3) . ?
C27 H27A 0.97 . ?
C27 H27B 0.97 . ?
C3A O3B 1.250(3) . ?
C3A O2B 1.258(3) . ?
C3A C4A 1.502(3) . ?
C4A H4A1 0.96 . ?
C4A H4A2 0.96 . ?
C4A H4A3 0.96 . ?
C1A O2A 1.243(3) . ?
C1A O3A 1.258(3) . ?
C1A C2A 1.502(4) . ?
C2A H2A1 0.96 . ?
C2A H2A2 0.96 . ?
C2A H2A3 0.96 . ?
N1 Zn1 2.2346(19) . ?
N3 Zn1 2.1443(19) . ?
N2 Zn1 2.2306(19) . ?
N5 Zn2 2.247(2) . ?
N6 Zn2 2.1764(19) . ?
N4 Zn2 2.223(2) . ?
O2A Zn1 2.1825(16) . ?
O1 Zn1 2.0135(14) . ?
O1 Zn2 2.0342(14) . ?
O2B Zn1 2.0088(15) . ?
O3B Zn2 2.0849(16) . ?
O3A Zn2 2.0198(17) . ?
F1 P1 1.610(6) . ?
F2 P1 1.502(5) . ?
F3 P1 1.523(5) . ?
F4 P1 1.576(5) . ?
F5 P1 1.565(6) . ?
F6 P1 1.518(5) . ?
F1' P1 1.540(7) . ?
F2' P1 1.551(7) . ?
F3' P1 1.607(6) . ?
F4' P1 1.519(6) . ?
F5' P1 1.479(6) . ?
F6' P1 1.591(7) . ?
Zn1 Zn2 3.3714(4) . ?
 
loop_
    _geom_angle_atom_site_label_1
    _geom_angle_atom_site_label_2
    _geom_angle_atom_site_label_3
    _geom_angle
    _geom_angle_site_symmetry_1
    _geom_angle_site_symmetry_3
    _geom_angle_publ_flag
N1 C1 C2 122.7(2) . . ?
N1 C1 H1 118.6 . . ?
C2 C1 H1 118.6 . . ?
C3 C2 C1 118.7(3) . . ?
C3 C2 H2 120.7 . . ?
C1 C2 H2 120.7 . . ?
C2 C3 C4 119.3(3) . . ?
C2 C3 H3 120.3 . . ?
C4 C3 H3 120.3 . . ?
C3 C4 C5 118.9(3) . . ?
C3 C4 H4 120.5 . . ?
C5 C4 H4 120.5 . . ?
N1 C5 C4 121.8(2) . . ?
N1 C5 C6 115.6(2) . . ?
C4 C5 C6 122.6(2) . . ?
N2 C6 C5 112.12(19) . . ?
N2 C6 H6A 109.2 . . ?
C5 C6 H6A 109.2 . . ?
N2 C6 H6B 109.2 . . ?
C5 C6 H6B 109.2 . . ?
H6A C6 H6B 107.9 . . ?
N3 C7 C8 122.5(3) . . ?
N3 C7 H7 118.7 . . ?
C8 C7 H7 118.7 . . ?
C9 C8 C7 118.2(3) . . ?
C9 C8 H8 120.9 . . ?
C7 C8 H8 120.9 . . ?
C8 C9 C10 120.0(3) . . ?
C8 C9 H9 120 . . ?
C10 C9 H9 120 . . ?
C9 C10 C11 119.0(3) . . ?
C9 C10 H10 120.5 . . ?
C11 C10 H10 120.5 . . ?
N3 C11 C10 120.7(3) . . ?
N3 C11 C12 116.6(2) . . ?
C10 C11 C12 122.6(3) . . ?
N2 C12 C11 111.2(2) . . ?
N2 C12 H12A 109.4 . . ?
C11 C12 H12A 109.4 . . ?
N2 C12 H12B 109.4 . . ?
C11 C12 H12B 109.4 . . ?
H12A C12 H12B 108 . . ?
N2 C13 C14 112.13(19) . . ?
N2 C13 H13A 109.2 . . ?
C14 C13 H13A 109.2 . . ?
N2 C13 H13B 109.2 . . ?
C14 C13 H13B 109.2 . . ?
H13A C13 H13B 107.9 . . ?
C15 C14 C20 119.2(2) . . ?
C15 C14 C13 122.0(2) . . ?
C20 C14 C13 118.8(2) . . ?
C16 C15 C14 122.4(2) . . ?
C16 C15 H15 118.8 . . ?
C14 C15 H15 118.8 . . ?
C15 C16 C18 117.1(2) . . ?
C15 C16 C17 121.4(3) . . ?
C18 C16 C17 121.4(3) . . ?
C16 C17 H17A 109.5 . . ?
C16 C17 H17B 109.5 . . ?
H17A C17 H17B 109.5 . . ?
C16 C17 H17C 109.5 . . ?
H17A C17 H17C 109.5 . . ?
H17B C17 H17C 109.5 . . ?
C19 C18 C16 122.9(2) . . ?
C19 C18 H18 118.5 . . ?
C16 C18 H18 118.5 . . ?
C18 C19 C20 119.3(2) . . ?
C18 C19 C21 121.9(2) . . ?
C20 C19 C21 118.8(2) . . ?
O1 C20 C19 120.5(2) . . ?
O1 C20 C14 120.4(2) . . ?
C19 C20 C14 119.1(2) . . ?
N5 C21 C19 111.91(18) . . ?
N5 C21 H21A 109.2 . . ?
C19 C21 H21A 109.2 . . ?
N5 C21 H21B 109.2 . . ?
C19 C21 H21B 109.2 . . ?
H21A C21 H21B 107.9 . . ?
N6 C28 C29 122.8(3) . . ?
N6 C28 H28 118.6 . . ?
C29 C28 H28 118.6 . . ?
C30 C29 C28 118.2(3) . . ?
C30 C29 H29 120.9 . . ?
C28 C29 H29 120.9 . . ?
C29 C30 C31 119.6(3) . . ?
C29 C30 H30 120.2 . . ?
C31 C30 H30 120.2 . . ?
C30 C31 C32 119.7(3) . . ?
C30 C31 H31 120.1 . . ?
C32 C31 H31 120.1 . . ?
N6 C32 C31 120.7(2) . . ?
N6 C32 C33 115.9(2) . . ?
C31 C32 C33 123.3(2) . . ?
N5 C33 C32 110.67(19) . . ?
N5 C33 H33A 109.5 . . ?
C32 C33 H33A 109.5 . . ?
N5 C33 H33B 109.5 . . ?
C32 C33 H33B 109.5 . . ?
H33A C33 H33B 108.1 . . ?
N4 C22 C23 122.8(3) . . ?
N4 C22 H22 118.6 . . ?
C23 C22 H22 118.6 . . ?
C22 C23 C24 118.4(3) . . ?
C22 C23 H23 120.8 . . ?
C24 C23 H23 120.8 . . ?
C23 C24 C25 120.3(3) . . ?
C23 C24 H24 119.8 . . ?
C25 C24 H24 119.8 . . ?
C24 C25 C26 117.4(3) . . ?
C24 C25 H25 121.3 . . ?
C26 C25 H25 121.3 . . ?
N4 C26 C25 122.4(3) . . ?
N4 C26 C27 116.1(2) . . ?
C25 C26 C27 121.5(3) . . ?
N5 C27 C26 112.6(2) . . ?
N5 C27 H27A 109.1 . . ?
C26 C27 H27A 109.1 . . ?
N5 C27 H27B 109.1 . . ?
C26 C27 H27B 109.1 . . ?
H27A C27 H27B 107.8 . . ?
O3B C3A O2B 125.9(2) . . ?
O3B C3A C4A 117.6(2) . . ?
O2B C3A C4A 116.5(2) . . ?
C3A C4A H4A1 109.5 . . ?
C3A C4A H4A2 109.5 . . ?
H4A1 C4A H4A2 109.5 . . ?
C3A C4A H4A3 109.5 . . ?
H4A1 C4A H4A3 109.5 . . ?
H4A2 C4A H4A3 109.5 . . ?
O2A C1A O3A 126.8(2) . . ?
O2A C1A C2A 117.2(2) . . ?
O3A C1A C2A 116.0(2) . . ?
C1A C2A H2A1 109.5 . . ?
C1A C2A H2A2 109.5 . . ?
H2A1 C2A H2A2 109.5 . . ?
C1A C2A H2A3 109.5 . . ?
H2A1 C2A H2A3 109.5 . . ?
H2A2 C2A H2A3 109.5 . . ?
C1 N1 C5 118.5(2) . . ?
C1 N1 Zn1 123.30(16) . . ?
C5 N1 Zn1 113.33(15) . . ?
C7 N3 C11 119.5(2) . . ?
C7 N3 Zn1 125.93(18) . . ?
C11 N3 Zn1 114.42(17) . . ?
C12 N2 C6 111.14(19) . . ?
C12 N2 C13 111.00(19) . . ?
C6 N2 C13 111.11(19) . . ?
C12 N2 Zn1 104.63(15) . . ?
C6 N2 Zn1 109.18(14) . . ?
C13 N2 Zn1 109.57(14) . . ?
C33 N5 C27 111.62(18) . . ?
C33 N5 C21 111.33(18) . . ?
C27 N5 C21 111.5(2) . . ?
C33 N5 Zn2 103.18(14) . . ?
C27 N5 Zn2 109.15(15) . . ?
C21 N5 Zn2 109.72(14) . . ?
C28 N6 C32 118.9(2) . . ?
C28 N6 Zn2 126.92(17) . . ?
C32 N6 Zn2 114.13(15) . . ?
C26 N4 C22 118.6(2) . . ?
C26 N4 Zn2 114.05(16) . . ?
C22 N4 Zn2 123.4(2) . . ?
C1A O2A Zn1 132.80(16) . . ?
C20 O1 Zn1 122.41(12) . . ?
C20 O1 Zn2 124.68(13) . . ?
Zn1 O1 Zn2 112.80(7) . . ?
C3A O2B Zn1 130.15(14) . . ?
C3A O3B Zn2 134.30(15) . . ?
C1A O3A Zn2 128.22(15) . . ?
O2B Zn1 O1 100.20(6) . . ?
O2B Zn1 N3 95.64(7) . . ?
O1 Zn1 N3 163.19(7) . . ?
O2B Zn1 O2A 99.98(7) . . ?
O1 Zn1 O2A 87.91(6) . . ?
N3 Zn1 O2A 83.83(7) . . ?
O2B Zn1 N2 165.18(7) . . ?
O1 Zn1 N2 88.88(7) . . ?
N3 Zn1 N2 76.83(7) . . ?
O2A Zn1 N2 91.97(7) . . ?
O2B Zn1 N1 91.17(7) . . ?
O1 Zn1 N1 87.65(6) . . ?
N3 Zn1 N1 97.66(7) . . ?
O2A Zn1 N1 168.57(7) . . ?
N2 Zn1 N1 77.41(7) . . ?
O2B Zn1 Zn2 75.83(4) . . ?
O1 Zn1 Zn2 33.80(4) . . ?
N3 Zn1 Zn2 150.00(5) . . ?
O2A Zn1 Zn2 69.81(4) . . ?
N2 Zn1 Zn2 116.93(5) . . ?
N1 Zn1 Zn2 111.05(5) . . ?
O3A Zn2 O1 100.51(6) . . ?
O3A Zn2 O3B 96.49(7) . . ?
O1 Zn2 O3B 92.43(6) . . ?
O3A Zn2 N6 96.43(7) . . ?
O1 Zn2 N6 163.04(7) . . ?
O3B Zn2 N6 84.98(7) . . ?
O3A Zn2 N4 92.35(8) . . ?
O1 Zn2 N4 86.73(7) . . ?
O3B Zn2 N4 171.13(8) . . ?
N6 Zn2 N4 93.24(7) . . ?
O3A Zn2 N5 166.55(7) . . ?
O1 Zn2 N5 87.53(6) . . ?
O3B Zn2 N5 93.90(7) . . ?
N6 Zn2 N5 75.96(7) . . ?
N4 Zn2 N5 77.25(8) . . ?
O3A Zn2 Zn1 77.55(5) . . ?
O1 Zn2 Zn1 33.41(4) . . ?
O3B Zn2 Zn1 71.39(4) . . ?
N6 Zn2 Zn1 154.56(5) . . ?
N4 Zn2 Zn1 111.54(5) . . ?
N5 Zn2 Zn1 114.02(5) . . ?
F5' P1 F2 118.5(6) . . ?
F5' P1 F6 101.7(5) . . ?
F2 P1 F6 95.9(4) . . ?
F5' P1 F4' 93.6(6) . . ?
F2 P1 F4' 147.8(7) . . ?
F6 P1 F4' 79.5(6) . . ?
F5' P1 F3 146.3(6) . . ?
F2 P1 F3 90.6(4) . . ?
F6 P1 F3 91.0(4) . . ?
F4' P1 F3 57.9(6) . . ?
F5' P1 F1' 95.0(5) . . ?
F2 P1 F1' 83.4(6) . . ?
F6 P1 F1' 161.2(6) . . ?
F4' P1 F1' 91.1(5) . . ?
F3 P1 F1' 70.3(6) . . ?
F5' P1 F2' 93.1(6) . . ?
F2 P1 F2' 25.8(5) . . ?
F6 P1 F2' 97.7(6) . . ?
F4' P1 F2' 173.2(7) . . ?
F3 P1 F2' 116.3(6) . . ?
F1' P1 F2' 89.8(4) . . ?
F5' P1 F5 31.7(5) . . ?
F2 P1 F5 90.9(5) . . ?
F6 P1 F5 90.2(4) . . ?
F4' P1 F5 120.8(6) . . ?
F3 P1 F5 178.0(6) . . ?
F1' P1 F5 108.5(7) . . ?
F2' P1 F5 65.2(7) . . ?
F5' P1 F4 59.5(6) . . ?
F2 P1 F4 174.5(4) . . ?
F6 P1 F4 89.6(3) . . ?
F4' P1 F4 34.1(4) . . ?
F3 P1 F4 89.8(5) . . ?
F1' P1 F4 91.6(5) . . ?
F2' P1 F4 152.6(7) . . ?
F5 P1 F4 88.6(5) . . ?
F5' P1 F6' 90.7(4) . . ?
F2 P1 F6' 93.8(4) . . ?
F6 P1 F6' 13.9(6) . . ?
F4' P1 F6' 88.6(4) . . ?
F3 P1 F6' 104.8(5) . . ?
F1' P1 F6' 174.3(5) . . ?
F2' P1 F6' 89.8(4) . . ?
F5 P1 F6' 76.4(6) . . ?
F4 P1 F6' 91.4(4) . . ?
F5' P1 F3' 175.9(6) . . ?
F2 P1 F3' 59.8(5) . . ?
F6 P1 F3' 75.2(5) . . ?
F4' P1 F3' 88.4(6) . . ?
F3 P1 F3' 37.3(3) . . ?
F1' P1 F3' 88.5(4) . . ?
F2' P1 F3' 84.8(5) . . ?
F5 P1 F3' 144.7(6) . . ?
F4 P1 F3' 122.5(6) . . ?
F6' P1 F3' 85.8(4) . . ?
F5' P1 F1 76.3(6) . . ?
F2 P1 F1 88.5(3) . . ?
F6 P1 F1 175.6(4) . . ?
F4' P1 F1 96.6(6) . . ?
F3 P1 F1 88.8(4) . . ?
F1' P1 F1 19.3(6) . . ?
F2' P1 F1 86.4(7) . . ?
F5 P1 F1 89.9(4) . . ?
F4 P1 F1 86.0(3) . . ?
F6' P1 F1 166.2(6) . . ?
F3' P1 F1 107.1(5) . . ?
 
#===END

 
data_855sb6
 
_audit_creation_date                    2014-04-22T13:26:26-00:00
_audit_creation_method                  'WinGX routine CIF_UPDATE'
_audit_conform_dict_name                cif_core.dic
_audit_conform_dict_version             2.4
_audit_conform_dict_location            ftp://ftp.iucr.org/pub/cif_core.dic
_publ_requested_category                FM
 
#----------------------------------------------------------------------------#
#                   CHEMICAL INFORMATION                                     #
#----------------------------------------------------------------------------#
 

 
_chemical_name_systematic
;
 ?
;
_chemical_formula_moiety
'C47 H62 N8 O7 Zn2, P F6, 0.5 (C3 H6 O), 0.5 (H2 O)'
_chemical_formula_sum                'C48.50 H61 F6 N8 O8 P Zn2'
_chemical_formula_weight                1159.76
_chemical_compound_source               'synthesis as described'
 
#----------------------------------------------------------------------------#
#                   UNIT CELL INFORMATION                                    #
#----------------------------------------------------------------------------#
 
_symmetry_cell_setting                  monoclinic
_symmetry_space_group_name_H-M          'P 1 21/n 1'
_symmetry_space_group_name_Hall         '-P 2yn'
_symmetry_Int_Tables_number             14
loop_
    _symmetry_equiv_pos_as_xyz
'x, y, z'
'-x+1/2, y+1/2, -z+1/2'
'-x, -y, -z'
'x-1/2, -y-1/2, z-1/2'
 
_cell_length_a                          16.2410(10)
_cell_length_b                          21.5930(10)
_cell_length_c                          16.3693(8)
_cell_angle_alpha                       90
_cell_angle_beta                        100.533(6)
_cell_angle_gamma                       90
_cell_volume                            5643.9(5)
_cell_formula_units_Z                   4
_cell_measurement_temperature           293(2)
_cell_measurement_reflns_used           5757
_cell_measurement_theta_min             3.0298
_cell_measurement_theta_max             28.7716
_cell_measurement_wavelength            0.71073
 
#----------------------------------------------------------------------------#
#                   CRYSTAL INFORMATION                                      #
#----------------------------------------------------------------------------#
 
_exptl_crystal_description              prism
_exptl_crystal_colour                   colourless
_exptl_crystal_size_max                 0.4
_exptl_crystal_size_mid                 0.4
_exptl_crystal_size_min                 0.2
_exptl_crystal_density_diffrn           1.365
_exptl_crystal_density_method           'not measured'
_exptl_crystal_F_000                    2404
_exptl_special_details
;
 ?
;
 
#----------------------------------------------------------------------------#
#                   ABSORPTION CORRECTION                                    #
#----------------------------------------------------------------------------#
 
_exptl_absorpt_coefficient_mu           0.953
_exptl_absorpt_correction_type          multi-scan
_exptl_absorpt_process_details
;
        CrysAlisPro, Agilent Technologies,
        Version 1.171.36.20 (release 27-06-2012 CrysAlis171 .NET)
        (compiled Jul 11 2012,15:38:31)
        Empirical absorption correction using spherical harmonics,
 implemented in SCALE3 ABSPACK scaling algorithm.
;
_exptl_absorpt_correction_T_min         0.96875
_exptl_absorpt_correction_T_max         1
 
#----------------------------------------------------------------------------#
#                   DATA COLLECTION                                          #
#----------------------------------------------------------------------------#
 
_diffrn_ambient_temperature             293(2)
_diffrn_radiation_wavelength            0.71073
_diffrn_radiation_type                  MoK\a
_diffrn_radiation_monochromator         graphite
_diffrn_radiation_probe                 x-ray
_diffrn_detector_area_resol_mean        16.0696
_diffrn_orient_matrix_ub_11             -0.0364606
_diffrn_orient_matrix_ub_12             -0.0141432
_diffrn_orient_matrix_ub_13             -0.0228443
_diffrn_orient_matrix_ub_21             -0.0204704
_diffrn_orient_matrix_ub_22             0.0291572
_diffrn_orient_matrix_ub_23             -0.004091
_diffrn_orient_matrix_ub_31             0.0149616
_diffrn_orient_matrix_ub_32             0.0054556
_diffrn_orient_matrix_ub_33             -0.0374526
_diffrn_measurement_device_type         'Xcalibur, Sapphire3, Gemini ultra'
_diffrn_measurement_method              '\w scans'
_diffrn_reflns_av_R_equivalents         0.0342
_diffrn_reflns_av_unetI/netI            0.0474
_diffrn_reflns_number                   25999
_diffrn_reflns_limit_h_min              -13
_diffrn_reflns_limit_h_max              19
_diffrn_reflns_limit_k_min              -25
_diffrn_reflns_limit_k_max              22
_diffrn_reflns_limit_l_min              -19
_diffrn_reflns_limit_l_max              19
_diffrn_reflns_theta_min                3.1
_diffrn_reflns_theta_max                25
_diffrn_reflns_theta_full               25
_diffrn_measured_fraction_theta_full
                                        0.998
_diffrn_measured_fraction_theta_max
                                        0.998
_reflns_number_total                    9929
_reflns_number_gt                       7574
_reflns_threshold_expression            >2\s(I)
 
#----------------------------------------------------------------------------#
#                   COMPUTER PROGRAMS USED                                   #
#----------------------------------------------------------------------------#
 
_computing_data_collection
;
        CrysAlisPro, Agilent Technologies,
        Version 1.171.36.20 (release 27-06-2012 CrysAlis171 .NET)
        (compiled Jul 11 2012,15:38:31)
;
_computing_cell_refinement
;
        CrysAlisPro, Agilent Technologies,
        Version 1.171.36.20 (release 27-06-2012 CrysAlis171 .NET)
        (compiled Jul 11 2012,15:38:31)
;
_computing_data_reduction
;
        CrysAlisPro, Agilent Technologies,
        Version 1.171.36.20 (release 27-06-2012 CrysAlis171 .NET)
        (compiled Jul 11 2012,15:38:31)
;
_computing_structure_refinement         'SHELXL-97 (Sheldrick, 2008)'
_computing_molecular_graphics           'Ortep-3 for Windows (Farrugia, 1997)'
_computing_publication_material
                                   'WinGX publication routines (Farrugia, 1999)'
 
#----------------------------------------------------------------------------#
#                   STRUCTURE SOLUTION
#----------------------------------------------------------------------------#
 
_atom_sites_solution_primary            direct
_atom_sites_solution_secondary          difmap
_atom_sites_solution_hydrogens          geom
 
#----------------------------------------------------------------------------#
#                   REFINEMENT INFORMATION                                   #
#----------------------------------------------------------------------------#
 
_refine_special_details
;
 Refinement of F^2^ against ALL reflections.  The weighted R-factor wR and
 goodness of fit S are based on F^2^, conventional R-factors R are based
 on F, with F set to zero for negative F^2^. The threshold expression of
 F^2^ > 2\s(F^2^) is used only for calculating R-factors(gt) etc. and is
 not relevant to the choice of reflections for refinement.  R-factors based
 on F^2^ are statistically about twice as large as those based on F, and R-
 factors based on ALL data will be even larger.
;
_refine_ls_structure_factor_coef        Fsqd
_refine_ls_matrix_type                  full
_refine_ls_weighting_scheme             calc
_refine_ls_weighting_details
         'calc w=1/[\s^2^(Fo^2^)+(0.0879P)^2^+3.8365P] where P=(Fo^2^+2Fc^2^)/3'
_refine_ls_hydrogen_treatment           constr
_refine_ls_extinction_method            none
_refine_ls_number_reflns                9929
_refine_ls_number_parameters            665
_refine_ls_number_restraints            0
_refine_ls_R_factor_all                 0.0775
_refine_ls_R_factor_gt                  0.0564
_refine_ls_wR_factor_ref                0.1643
_refine_ls_wR_factor_gt                 0.152
_refine_ls_goodness_of_fit_ref          1.058
_refine_ls_restrained_S_all             1.058
_refine_ls_shift/su_max                 0.001
_refine_ls_shift/su_mean                0
_refine_diff_density_max                1.013
_refine_diff_density_min                -0.34
_refine_diff_density_rms                0.076
 
#----------------------------------------------------------------------------#
#                   ATOMIC TYPES, COORDINATES AND THERMAL PARAMETERS         #
#----------------------------------------------------------------------------#
 
loop_
    _atom_type_symbol
    _atom_type_description
    _atom_type_scat_dispersion_real
    _atom_type_scat_dispersion_imag
    _atom_type_scat_source
C C 0.0033 0.0016 'International Tables Vol C Tables 4.2.6.8 and 6.1.1.4'
H H 0 0 'International Tables Vol C Tables 4.2.6.8 and 6.1.1.4'
N N 0.0061 0.0033 'International Tables Vol C Tables 4.2.6.8 and 6.1.1.4'
O O 0.0106 0.006 'International Tables Vol C Tables 4.2.6.8 and 6.1.1.4'
F F 0.0171 0.0103 'International Tables Vol C Tables 4.2.6.8 and 6.1.1.4'
P P 0.1023 0.0942 'International Tables Vol C Tables 4.2.6.8 and 6.1.1.4'
Zn Zn 0.2839 1.4301 'International Tables Vol C Tables 4.2.6.8 and 6.1.1.4'
 
loop_
    _atom_site_label
    _atom_site_type_symbol
    _atom_site_fract_x
    _atom_site_fract_y
    _atom_site_fract_z
    _atom_site_U_iso_or_equiv
    _atom_site_adp_type
    _atom_site_occupancy
    _atom_site_symmetry_multiplicity
    _atom_site_calc_flag
    _atom_site_refinement_flags
    _atom_site_disorder_assembly
    _atom_site_disorder_group
C1 C 0.7398(3) 0.2381(2) 0.8275(3) 0.0481(11) Uani 1 1 d . . .
H1 H 0.7544 0.1978 0.8441 0.058 Uiso 1 1 calc R . .
C2 C 0.6569(3) 0.2519(2) 0.8030(3) 0.0583(13) Uani 1 1 d . . .
H2 H 0.6162 0.2216 0.8032 0.07 Uiso 1 1 calc R . .
C3 C 0.6352(3) 0.3104(3) 0.7785(4) 0.0664(14) Uani 1 1 d . . .
H3 H 0.5791 0.3209 0.7618 0.08 Uiso 1 1 calc R . .
C4 C 0.6970(3) 0.3545(2) 0.7784(3) 0.0571(12) Uani 1 1 d . . .
H4 H 0.6831 0.3948 0.7613 0.069 Uiso 1 1 calc R . .
C5 C 0.7797(3) 0.33767(19) 0.8042(2) 0.0403(9) Uani 1 1 d . . .
C6 C 0.8495(3) 0.38351(19) 0.8083(3) 0.0442(10) Uani 1 1 d . . .
H6A H 0.8313 0.4172 0.7701 0.053 Uiso 1 1 calc R . .
H6B H 0.8625 0.4007 0.8639 0.053 Uiso 1 1 calc R . .
C22 C 0.9880(3) 0.2948(2) 1.0258(2) 0.0425(10) Uani 1 1 d . . .
C23 C 1.0270(3) 0.3341(2) 1.0892(3) 0.0556(13) Uani 1 1 d . . .
H23 H 1.0328 0.3224 1.1446 0.067 Uiso 1 1 calc R . .
C24 C 1.0564(3) 0.3898(3) 1.0682(3) 0.0594(13) Uani 1 1 d . . .
H24 H 1.0826 0.4163 1.1096 0.071 Uiso 1 1 calc R . .
C25 C 1.0477(3) 0.4070(2) 0.9866(3) 0.0535(12) Uani 1 1 d . . .
H25 H 1.0664 0.4455 0.9723 0.064 Uiso 1 1 calc R . .
C26 C 1.0106(3) 0.3662(2) 0.9262(3) 0.0446(10) Uani 1 1 d . . .
C27 C 1.0019(3) 0.3826(2) 0.8361(3) 0.0476(11) Uani 1 1 d . . .
H27A H 1 0.4273 0.8299 0.057 Uiso 1 1 calc R . .
H27B H 1.0503 0.3676 0.8151 0.057 Uiso 1 1 calc R . .
C13 C 0.9261(3) 0.3619(2) 0.6971(2) 0.0439(10) Uani 1 1 d . . .
H13A H 0.977 0.3436 0.6849 0.053 Uiso 1 1 calc R . .
H13B H 0.9266 0.4056 0.6832 0.053 Uiso 1 1 calc R . .
C14 C 0.8521(3) 0.3317(2) 0.6439(2) 0.0426(10) Uani 1 1 d . . .
C15 C 0.7922(3) 0.3646(2) 0.5896(3) 0.0528(12) Uani 1 1 d . . .
H15 H 0.7976 0.4073 0.5863 0.063 Uiso 1 1 calc R . .
C16 C 0.7248(3) 0.3361(2) 0.5401(3) 0.0583(13) Uani 1 1 d . . .
C17 C 0.6589(4) 0.3725(3) 0.4825(4) 0.092(2) Uani 1 1 d . . .
H17A H 0.6725 0.4158 0.4869 0.139 Uiso 1 1 calc R . .
H17B H 0.6053 0.3657 0.4977 0.139 Uiso 1 1 calc R . .
H17C H 0.6572 0.359 0.4263 0.139 Uiso 1 1 calc R . .
C18 C 0.7194(3) 0.2725(2) 0.5454(3) 0.0546(12) Uani 1 1 d . . .
H18 H 0.6754 0.2522 0.5114 0.066 Uiso 1 1 calc R . .
C19 C 0.7767(3) 0.2377(2) 0.5992(3) 0.0435(10) Uani 1 1 d . . .
C20 C 0.8432(3) 0.26782(19) 0.6495(2) 0.0388(9) Uani 1 1 d . . .
C21 C 0.7682(3) 0.1694(2) 0.6098(3) 0.0467(11) Uani 1 1 d . . .
H21A H 0.7628 0.161 0.6668 0.056 Uiso 1 1 calc R . .
H21B H 0.7173 0.1554 0.5741 0.056 Uiso 1 1 calc R . .
C7 C 1.0218(3) 0.2498(2) 0.5359(3) 0.0543(12) Uani 1 1 d . . .
H7 H 1.064 0.261 0.5798 0.065 Uiso 1 1 calc R . .
C8 C 1.0180(4) 0.2791(3) 0.4618(3) 0.0710(15) Uani 1 1 d . . .
H8 H 1.0567 0.3097 0.4555 0.085 Uiso 1 1 calc R . .
C9 C 0.9556(4) 0.2626(3) 0.3962(4) 0.0782(17) Uani 1 1 d . . .
H9 H 0.9526 0.2808 0.3442 0.094 Uiso 1 1 calc R . .
C10 C 0.8983(3) 0.2189(3) 0.4094(3) 0.0607(13) Uani 1 1 d . . .
H10 H 0.8545 0.2082 0.3667 0.073 Uiso 1 1 calc R . .
C11 C 0.9056(3) 0.1906(2) 0.4869(2) 0.0426(10) Uani 1 1 d . . .
C12 C 0.8473(3) 0.1403(2) 0.5023(3) 0.0493(11) Uani 1 1 d . . .
H12A H 0.7922 0.1488 0.47 0.059 Uiso 1 1 calc R . .
H12B H 0.8665 0.1015 0.4827 0.059 Uiso 1 1 calc R . .
C28 C 1.0560(3) 0.0337(2) 0.6291(2) 0.0420(10) Uani 1 1 d . . .
C29 C 1.0592(3) -0.0301(2) 0.6303(3) 0.0532(11) Uani 1 1 d . . .
H29 H 1.1102 -0.0508 0.638 0.064 Uiso 1 1 calc R . .
C30 C 0.9854(3) -0.0620(2) 0.6201(3) 0.0601(13) Uani 1 1 d . . .
H30 H 0.986 -0.1051 0.6192 0.072 Uiso 1 1 calc R . .
C31 C 0.9106(3) -0.0313(2) 0.6110(3) 0.0542(12) Uani 1 1 d . . .
H31 H 0.8603 -0.053 0.6025 0.065 Uiso 1 1 calc R . .
C32 C 0.9115(3) 0.0324(2) 0.6148(3) 0.0445(10) Uani 1 1 d . . .
C33 C 0.8317(3) 0.06760(19) 0.6113(3) 0.0483(11) Uani 1 1 d . . .
H33A H 0.7884 0.0487 0.5702 0.058 Uiso 1 1 calc R . .
H33B H 0.8143 0.0648 0.6648 0.058 Uiso 1 1 calc R . .
C1A C 1.1029(3) 0.2216(2) 0.7757(3) 0.0464(10) Uani 1 1 d . . .
C2A C 1.1945(3) 0.2362(4) 0.7991(5) 0.105(3) Uani 1 1 d . . .
H2A1 H 1.2246 0.2147 0.7625 0.158 Uiso 1 1 calc R . .
H2A2 H 1.2147 0.2233 0.8553 0.158 Uiso 1 1 calc R . .
H2A3 H 1.2027 0.28 0.7944 0.158 Uiso 1 1 calc R . .
C3A C 0.9265(3) 0.1204(2) 0.8412(3) 0.0451(10) Uani 1 1 d . . .
C4A C 0.9133(5) 0.0615(3) 0.8866(3) 0.097(2) Uani 1 1 d . . .
H4A1 H 0.9029 0.0714 0.941 0.145 Uiso 1 1 calc R . .
H4A2 H 0.9625 0.0361 0.8917 0.145 Uiso 1 1 calc R . .
H4A3 H 0.8662 0.0394 0.8561 0.145 Uiso 1 1 calc R . .
C34 C 0.9300(3) 0.2191(2) 1.1133(3) 0.0532(12) Uani 1 1 d . . .
C35 C 0.8890(3) 0.1561(2) 1.1123(3) 0.0613(13) Uani 1 1 d . . .
C36B C 0.9547(4) 0.1064(3) 1.1036(4) 0.090(2) Uani 1 1 d . . .
H36A H 0.9296 0.0661 1.1029 0.135 Uiso 1 1 calc R . .
H36B H 1.0004 0.1093 1.1498 0.135 Uiso 1 1 calc R . .
H36C H 0.9751 0.1129 1.0528 0.135 Uiso 1 1 calc R . .
C36A C 0.8139(4) 0.1510(3) 1.0416(3) 0.0746(16) Uani 1 1 d . . .
H36D H 0.7894 0.1106 1.0422 0.112 Uiso 1 1 calc R . .
H36E H 0.8319 0.1573 0.9895 0.112 Uiso 1 1 calc R . .
H36F H 0.7732 0.1819 1.0484 0.112 Uiso 1 1 calc R . .
C36C C 0.8608(5) 0.1461(3) 1.1951(4) 0.101(2) Uani 1 1 d . . .
H36G H 0.8349 0.1061 1.1952 0.151 Uiso 1 1 calc R . .
H36H H 0.8213 0.1776 1.2028 0.151 Uiso 1 1 calc R . .
H36I H 0.9085 0.1481 1.2393 0.151 Uiso 1 1 calc R . .
C37 C 1.1966(3) 0.0545(2) 0.6019(3) 0.0507(11) Uani 1 1 d . . .
C38 C 1.2633(3) 0.1038(3) 0.6022(4) 0.0647(14) Uani 1 1 d . . .
C39A C 1.3206(4) 0.0834(4) 0.5417(6) 0.137(4) Uani 1 1 d . . .
H39A H 1.2881 0.0794 0.4868 0.205 Uiso 1 1 calc R . .
H39B H 1.3458 0.0443 0.5594 0.205 Uiso 1 1 calc R . .
H39C H 1.3636 0.1138 0.5414 0.205 Uiso 1 1 calc R . .
C39B C 1.2249(4) 0.1659(3) 0.5717(6) 0.113(3) Uani 1 1 d . . .
H39D H 1.1951 0.1616 0.5157 0.17 Uiso 1 1 calc R . .
H39E H 1.2684 0.1961 0.5735 0.17 Uiso 1 1 calc R . .
H39F H 1.1868 0.1789 0.6068 0.17 Uiso 1 1 calc R . .
C39C C 1.3100(5) 0.1115(4) 0.6885(5) 0.135(3) Uani 1 1 d . . .
H39G H 1.3523 0.1427 0.6895 0.202 Uiso 1 1 calc R . .
H39H H 1.3359 0.073 0.7079 0.202 Uiso 1 1 calc R . .
H39I H 1.2719 0.1239 0.724 0.202 Uiso 1 1 calc R . .
N1 N 0.8012(2) 0.27999(16) 0.8288(2) 0.0394(8) Uani 1 1 d . . .
N3 N 0.9813(2) 0.31044(16) 0.9448(2) 0.0402(8) Uani 1 1 d . . .
N2 N 0.9256(2) 0.35545(15) 0.7875(2) 0.0398(8) Uani 1 1 d . . .
N4 N 0.9679(2) 0.20550(16) 0.5492(2) 0.0424(8) Uani 1 1 d . . .
N6 N 0.9836(2) 0.06504(15) 0.6237(2) 0.0405(8) Uani 1 1 d . . .
N5 N 0.8401(2) 0.13336(16) 0.5900(2) 0.0412(8) Uani 1 1 d . . .
N7 N 0.9523(2) 0.23861(18) 1.0402(2) 0.0490(9) Uani 1 1 d . . .
H7A H 0.9431 0.2131 0.9992 0.059 Uiso 1 1 calc R . .
N8 N 1.1267(2) 0.07074(17) 0.6325(2) 0.0486(9) Uani 1 1 d . . .
H8A H 1.1265 0.1065 0.6555 0.058 Uiso 1 1 calc R . .
O1 O 0.89847(17) 0.23546(12) 0.70365(16) 0.0400(6) Uani 1 1 d . . .
O2A O 1.05698(18) 0.24641(14) 0.81798(19) 0.0501(8) Uani 1 1 d . . .
O3A O 1.08045(17) 0.18523(14) 0.71475(18) 0.0480(7) Uani 1 1 d . . .
O2B O 0.92278(19) 0.17123(13) 0.87847(17) 0.0479(7) Uani 1 1 d . . .
O3B O 0.9406(2) 0.11360(14) 0.77037(18) 0.0546(8) Uani 1 1 d . . .
O4 O 0.9428(3) 0.25113(18) 1.1756(2) 0.0769(11) Uani 1 1 d . . .
O5 O 1.2050(2) 0.00303(17) 0.5755(2) 0.0699(10) Uani 1 1 d . . .
P1 P 0.62348(12) 0.06268(7) 0.81918(9) 0.0772(5) Uani 1 1 d . . .
F1 F 0.5793(4) 0.02185(18) 0.7450(3) 0.1371(18) Uani 1 1 d . . .
F2 F 0.5773(5) 0.0235(3) 0.8755(3) 0.189(3) Uani 1 1 d . . .
F3 F 0.6945(4) 0.0142(2) 0.8364(5) 0.187(3) Uani 1 1 d . . .
F4 F 0.6635(4) 0.1042(2) 0.8929(2) 0.148(2) Uani 1 1 d . . .
F5 F 0.6696(3) 0.1002(2) 0.7606(3) 0.1323(17) Uani 1 1 d . . .
F6 F 0.5507(3) 0.1114(2) 0.7986(4) 0.165(2) Uani 1 1 d . . .
Zn1 Zn 0.93062(3) 0.25697(2) 0.82576(3) 0.03744(15) Uani 1 1 d . . .
Zn2 Zn 0.95922(3) 0.16316(2) 0.66655(3) 0.03737(15) Uani 1 1 d . . .
C40 C 0.1338(12) 0.5470(9) 0.5836(11) 0.142(6) Uiso 0.5 1 d P . .
H40C H 0.1775 0.575 0.6078 0.213 Uiso 0.5 1 d PR . .
H40B H 0.0812 0.5613 0.5951 0.213 Uiso 0.5 1 d PR . .
H40A H 0.1312 0.5452 0.5246 0.213 Uiso 0.5 1 d PR . .
C41 C 0.1510(11) 0.4861(8) 0.6196(11) 0.111(5) Uiso 0.5 1 d P . .
C42 C 0.1018(9) 0.4380(7) 0.5997(9) 0.107(5) Uiso 0.5 1 d P . .
H42A H 0.1262 0.4023 0.6297 0.161 Uiso 0.5 1 d PR . .
H42B H 0.0957 0.4305 0.541 0.161 Uiso 0.5 1 d PR . .
H42C H 0.0478 0.446 0.6134 0.161 Uiso 0.5 1 d PR . .
O6 O 0.2070(11) 0.4849(8) 0.6757(11) 0.189(6) Uiso 0.5 1 d P . .
O7 O 0.2123(7) 0.4043(5) 0.8287(8) 0.135(4) Uani 0.5 1 d P . .
 
loop_
    _atom_site_aniso_label
    _atom_site_aniso_U_11
    _atom_site_aniso_U_22
    _atom_site_aniso_U_33
    _atom_site_aniso_U_23
    _atom_site_aniso_U_13
    _atom_site_aniso_U_12
C1 0.055(3) 0.043(2) 0.050(3) 0.000(2) 0.019(2) -0.001(2)
C2 0.041(3) 0.059(3) 0.078(3) -0.005(3) 0.019(2) -0.005(2)
C3 0.039(3) 0.071(4) 0.085(4) -0.003(3) 0.001(3) 0.004(3)
C4 0.053(3) 0.054(3) 0.063(3) 0.000(2) 0.006(2) 0.010(2)
C5 0.047(2) 0.040(2) 0.036(2) -0.0074(18) 0.0116(18) 0.0033(19)
C6 0.050(3) 0.037(2) 0.047(2) -0.0030(19) 0.010(2) 0.0016(19)
C22 0.036(2) 0.050(3) 0.040(2) -0.004(2) 0.0041(18) 0.0082(19)
C23 0.044(3) 0.080(4) 0.038(2) -0.013(2) -0.004(2) 0.006(3)
C24 0.048(3) 0.070(3) 0.056(3) -0.026(3) -0.001(2) -0.007(2)
C25 0.049(3) 0.054(3) 0.054(3) -0.009(2) 0.002(2) -0.007(2)
C26 0.038(2) 0.047(3) 0.047(2) -0.012(2) 0.0038(19) 0.000(2)
C27 0.051(3) 0.040(2) 0.051(2) -0.004(2) 0.007(2) -0.013(2)
C13 0.054(3) 0.040(2) 0.041(2) 0.0016(19) 0.015(2) -0.007(2)
C14 0.047(2) 0.048(3) 0.034(2) -0.0024(19) 0.0104(19) -0.002(2)
C15 0.067(3) 0.047(3) 0.043(2) 0.005(2) 0.008(2) 0.008(2)
C16 0.057(3) 0.064(3) 0.050(3) 0.002(2) 0.000(2) 0.012(3)
C17 0.085(4) 0.088(5) 0.090(4) 0.010(4) -0.021(4) 0.022(4)
C18 0.039(2) 0.071(3) 0.050(3) -0.011(2) -0.002(2) 0.002(2)
C19 0.033(2) 0.053(3) 0.045(2) -0.009(2) 0.0071(19) -0.0004(19)
C20 0.041(2) 0.041(2) 0.036(2) -0.0047(18) 0.0114(18) 0.0027(19)
C21 0.032(2) 0.051(3) 0.057(3) -0.013(2) 0.009(2) -0.0056(19)
C7 0.059(3) 0.057(3) 0.049(3) -0.002(2) 0.014(2) -0.013(2)
C8 0.076(4) 0.075(4) 0.066(3) 0.015(3) 0.027(3) -0.010(3)
C9 0.082(4) 0.098(5) 0.059(3) 0.033(3) 0.022(3) 0.013(4)
C10 0.056(3) 0.084(4) 0.040(2) 0.003(3) 0.003(2) 0.013(3)
C11 0.040(2) 0.052(3) 0.037(2) -0.006(2) 0.0095(19) 0.007(2)
C12 0.048(3) 0.058(3) 0.038(2) -0.014(2) -0.001(2) -0.002(2)
C28 0.042(2) 0.046(2) 0.040(2) -0.0092(19) 0.0134(19) -0.001(2)
C29 0.058(3) 0.045(3) 0.060(3) 0.002(2) 0.021(2) 0.004(2)
C30 0.073(3) 0.035(2) 0.076(3) 0.000(2) 0.024(3) -0.006(2)
C31 0.054(3) 0.042(3) 0.067(3) -0.005(2) 0.013(2) -0.014(2)
C32 0.045(2) 0.046(3) 0.045(2) -0.006(2) 0.015(2) -0.009(2)
C33 0.043(2) 0.042(2) 0.061(3) -0.009(2) 0.012(2) -0.016(2)
C1A 0.041(2) 0.053(3) 0.046(2) -0.009(2) 0.009(2) -0.008(2)
C2A 0.043(3) 0.159(7) 0.113(5) -0.079(5) 0.013(3) -0.029(4)
C3A 0.052(3) 0.040(2) 0.046(2) -0.002(2) 0.014(2) 0.002(2)
C4A 0.189(8) 0.046(3) 0.067(4) 0.003(3) 0.055(4) -0.004(4)
C34 0.059(3) 0.063(3) 0.037(2) 0.003(2) 0.007(2) 0.015(2)
C35 0.076(3) 0.069(3) 0.039(2) 0.006(2) 0.009(2) 0.001(3)
C36B 0.112(5) 0.063(4) 0.088(4) 0.004(3) -0.001(4) 0.014(4)
C36A 0.072(4) 0.089(4) 0.063(3) 0.001(3) 0.012(3) -0.014(3)
C36C 0.145(6) 0.107(5) 0.057(3) 0.008(3) 0.036(4) -0.028(5)
C37 0.042(2) 0.059(3) 0.051(3) -0.011(2) 0.010(2) 0.002(2)
C38 0.043(3) 0.067(3) 0.087(4) -0.020(3) 0.021(3) -0.006(2)
C39A 0.086(5) 0.141(7) 0.210(9) -0.072(7) 0.099(6) -0.048(5)
C39B 0.091(5) 0.086(5) 0.173(8) 0.015(5) 0.054(5) -0.017(4)
C39C 0.112(6) 0.140(7) 0.134(7) -0.004(6) -0.027(5) -0.057(6)
N1 0.0397(19) 0.0390(19) 0.0409(18) 0.0004(16) 0.0110(15) -0.0005(16)
N3 0.0400(19) 0.042(2) 0.0371(18) -0.0066(16) 0.0046(15) 0.0009(16)
N2 0.0430(19) 0.0388(19) 0.0373(17) -0.0023(15) 0.0064(15) -0.0058(16)
N4 0.044(2) 0.047(2) 0.0377(18) -0.0026(16) 0.0095(16) -0.0046(16)
N6 0.0414(19) 0.0374(19) 0.0444(19) -0.0080(16) 0.0123(15) -0.0054(16)
N5 0.0380(18) 0.042(2) 0.0444(19) -0.0108(16) 0.0082(16) -0.0069(15)
N7 0.061(2) 0.054(2) 0.0316(18) -0.0039(17) 0.0077(17) 0.0034(19)
N8 0.042(2) 0.044(2) 0.063(2) -0.0146(18) 0.0181(18) -0.0045(17)
O1 0.0438(16) 0.0397(15) 0.0347(14) -0.0066(12) 0.0028(13) 0.0051(13)
O2A 0.0374(16) 0.062(2) 0.0501(17) -0.0175(15) 0.0065(14) -0.0012(14)
O3A 0.0364(15) 0.0583(19) 0.0496(17) -0.0177(15) 0.0087(13) -0.0050(14)
O2B 0.065(2) 0.0412(17) 0.0389(15) 0.0010(13) 0.0142(14) 0.0057(14)
O3B 0.079(2) 0.0457(18) 0.0441(17) -0.0035(14) 0.0238(16) -0.0009(16)
O4 0.108(3) 0.085(3) 0.0397(19) -0.0099(18) 0.018(2) -0.008(2)
O5 0.057(2) 0.067(2) 0.092(3) -0.028(2) 0.0317(19) -0.0039(18)
P1 0.1253(14) 0.0446(8) 0.0585(8) 0.0041(7) 0.0086(9) -0.0132(9)
F1 0.215(5) 0.074(3) 0.102(3) -0.012(2) -0.026(3) -0.026(3)
F2 0.293(8) 0.157(5) 0.132(4) 0.008(3) 0.081(5) -0.110(5)
F3 0.154(5) 0.085(3) 0.294(8) 0.017(4) -0.034(5) 0.014(3)
F4 0.249(6) 0.107(3) 0.071(2) -0.011(2) -0.014(3) -0.058(4)
F5 0.196(5) 0.115(3) 0.099(3) 0.001(2) 0.063(3) -0.053(3)
F6 0.140(4) 0.092(3) 0.252(6) -0.026(4) 0.007(4) 0.014(3)
Zn1 0.0399(3) 0.0372(3) 0.0352(3) -0.0038(2) 0.0068(2) 0.0006(2)
Zn2 0.0361(3) 0.0406(3) 0.0361(3) -0.0073(2) 0.0083(2) -0.0051(2)
O7 0.126(9) 0.117(9) 0.149(10) -0.002(7) -0.008(7) -0.022(7)
 
 
#----------------------------------------------------------------------------#
#                   MOLECULAR GEOMETRY                                       #
#----------------------------------------------------------------------------#
 
_geom_special_details
;
 All s.u.'s (except the s.u. in the dihedral angle between two l.s. planes)
 are estimated using the full covariance matrix.  The cell s.u.'s are taken
 into account individually in the estimation of s.u.'s in distances, angles
 and torsion angles; correlations between s.u.'s in cell parameters are only
 used when they are defined by crystal symmetry.  An approximate (isotropic)
 treatment of cell s.u.'s is used for estimating s.u.'s involving l.s. planes.
;
loop_
    _geom_bond_atom_site_label_1
    _geom_bond_atom_site_label_2
    _geom_bond_distance
    _geom_bond_site_symmetry_2
    _geom_bond_publ_flag
C1 N1 1.345(5) . ?
C1 C2 1.365(6) . ?
C1 H1 0.93 . ?
C2 C3 1.353(7) . ?
C2 H2 0.93 . ?
C3 C4 1.383(7) . ?
C3 H3 0.93 . ?
C4 C5 1.381(6) . ?
C4 H4 0.93 . ?
C5 N1 1.336(5) . ?
C5 C6 1.497(6) . ?
C6 N2 1.471(5) . ?
C6 H6A 0.97 . ?
C6 H6B 0.97 . ?
C22 N3 1.354(5) . ?
C22 N7 1.383(6) . ?
C22 C23 1.400(6) . ?
C23 C24 1.360(7) . ?
C23 H23 0.93 . ?
C24 C25 1.367(7) . ?
C24 H24 0.93 . ?
C25 C26 1.378(6) . ?
C25 H25 0.93 . ?
C26 N3 1.349(5) . ?
C26 C27 1.498(6) . ?
C27 N2 1.467(5) . ?
C27 H27A 0.97 . ?
C27 H27B 0.97 . ?
C13 N2 1.487(5) . ?
C13 C14 1.499(6) . ?
C13 H13A 0.97 . ?
C13 H13B 0.97 . ?
C14 C15 1.387(6) . ?
C14 C20 1.392(6) . ?
C15 C16 1.382(7) . ?
C15 H15 0.93 . ?
C16 C18 1.380(7) . ?
C16 C17 1.511(7) . ?
C17 H17A 0.96 . ?
C17 H17B 0.96 . ?
C17 H17C 0.96 . ?
C18 C19 1.381(6) . ?
C18 H18 0.93 . ?
C19 C20 1.394(6) . ?
C19 C21 1.495(6) . ?
C20 O1 1.337(5) . ?
C21 N5 1.488(5) . ?
C21 H21A 0.97 . ?
C21 H21B 0.97 . ?
C7 N4 1.339(6) . ?
C7 C8 1.360(7) . ?
C7 H7 0.93 . ?
C8 C9 1.382(8) . ?
C8 H8 0.93 . ?
C9 C10 1.371(8) . ?
C9 H9 0.93 . ?
C10 C11 1.394(6) . ?
C10 H10 0.93 . ?
C11 N4 1.338(5) . ?
C11 C12 1.492(6) . ?
C12 N5 1.470(5) . ?
C12 H12A 0.97 . ?
C12 H12B 0.97 . ?
C28 N6 1.346(5) . ?
C28 C29 1.378(6) . ?
C28 N8 1.392(5) . ?
C29 C30 1.366(7) . ?
C29 H29 0.93 . ?
C30 C31 1.368(7) . ?
C30 H30 0.93 . ?
C31 C32 1.378(6) . ?
C31 H31 0.93 . ?
C32 N6 1.351(5) . ?
C32 C33 1.494(6) . ?
C33 N5 1.474(5) . ?
C33 H33A 0.97 . ?
C33 H33B 0.97 . ?
C1A O2A 1.229(5) . ?
C1A O3A 1.269(5) . ?
C1A C2A 1.501(7) . ?
C2A H2A1 0.96 . ?
C2A H2A2 0.96 . ?
C2A H2A3 0.96 . ?
C3A O3B 1.231(5) . ?
C3A O2B 1.263(5) . ?
C3A C4A 1.508(7) . ?
C4A H4A1 0.96 . ?
C4A H4A2 0.96 . ?
C4A H4A3 0.96 . ?
C34 O4 1.218(5) . ?
C34 N7 1.377(6) . ?
C34 C35 1.515(7) . ?
C35 C36C 1.523(7) . ?
C35 C36A 1.523(7) . ?
C35 C36B 1.537(8) . ?
C36B H36A 0.96 . ?
C36B H36B 0.96 . ?
C36B H36C 0.96 . ?
C36A H36D 0.96 . ?
C36A H36E 0.96 . ?
C36A H36F 0.96 . ?
C36C H36G 0.96 . ?
C36C H36H 0.96 . ?
C36C H36I 0.96 . ?
C37 O5 1.208(5) . ?
C37 N8 1.367(5) . ?
C37 C38 1.520(7) . ?
C38 C39C 1.486(9) . ?
C38 C39B 1.523(9) . ?
C38 C39A 1.541(8) . ?
C39A H39A 0.96 . ?
C39A H39B 0.96 . ?
C39A H39C 0.96 . ?
C39B H39D 0.96 . ?
C39B H39E 0.96 . ?
C39B H39F 0.96 . ?
C39C H39G 0.96 . ?
C39C H39H 0.96 . ?
C39C H39I 0.96 . ?
N1 Zn1 2.169(3) . ?
N3 Zn1 2.284(3) . ?
N2 Zn1 2.214(3) . ?
N4 Zn2 2.155(3) . ?
N6 Zn2 2.289(3) . ?
N5 Zn2 2.199(3) . ?
N7 H7A 0.86 . ?
N8 H8A 0.86 . ?
O1 Zn2 2.000(3) . ?
O1 Zn1 2.025(3) . ?
O2A Zn1 2.092(3) . ?
O3A Zn2 2.039(3) . ?
O2B Zn1 2.056(3) . ?
O3B Zn2 2.077(3) . ?
P1 F2 1.543(5) . ?
P1 F3 1.545(5) . ?
P1 F4 1.548(4) . ?
P1 F5 1.549(4) . ?
P1 F1 1.564(4) . ?
P1 F6 1.571(5) . ?
Zn1 Zn2 3.3992(6) . ?
C40 C41 1.45(2) . ?
C40 H40C 0.96 . ?
C40 H40B 0.96 . ?
C40 H40A 0.96 . ?
C41 O6 1.169(19) . ?
C41 C42 1.315(19) . ?
C42 H42A 0.96 . ?
C42 H42B 0.96 . ?
C42 H42C 0.96 . ?
 
loop_
    _geom_angle_atom_site_label_1
    _geom_angle_atom_site_label_2
    _geom_angle_atom_site_label_3
    _geom_angle
    _geom_angle_site_symmetry_1
    _geom_angle_site_symmetry_3
    _geom_angle_publ_flag
N1 C1 C2 123.1(4) . . ?
N1 C1 H1 118.4 . . ?
C2 C1 H1 118.4 . . ?
C3 C2 C1 118.7(5) . . ?
C3 C2 H2 120.6 . . ?
C1 C2 H2 120.6 . . ?
C2 C3 C4 119.5(5) . . ?
C2 C3 H3 120.2 . . ?
C4 C3 H3 120.2 . . ?
C5 C4 C3 119.0(5) . . ?
C5 C4 H4 120.5 . . ?
C3 C4 H4 120.5 . . ?
N1 C5 C4 121.6(4) . . ?
N1 C5 C6 116.7(4) . . ?
C4 C5 C6 121.7(4) . . ?
N2 C6 C5 112.2(3) . . ?
N2 C6 H6A 109.2 . . ?
C5 C6 H6A 109.2 . . ?
N2 C6 H6B 109.2 . . ?
C5 C6 H6B 109.2 . . ?
H6A C6 H6B 107.9 . . ?
N3 C22 N7 115.2(4) . . ?
N3 C22 C23 121.3(4) . . ?
N7 C22 C23 123.6(4) . . ?
C24 C23 C22 118.7(4) . . ?
C24 C23 H23 120.6 . . ?
C22 C23 H23 120.6 . . ?
C23 C24 C25 120.6(4) . . ?
C23 C24 H24 119.7 . . ?
C25 C24 H24 119.7 . . ?
C24 C25 C26 118.7(5) . . ?
C24 C25 H25 120.6 . . ?
C26 C25 H25 120.6 . . ?
N3 C26 C25 122.2(4) . . ?
N3 C26 C27 117.3(4) . . ?
C25 C26 C27 120.4(4) . . ?
N2 C27 C26 111.0(3) . . ?
N2 C27 H27A 109.4 . . ?
C26 C27 H27A 109.4 . . ?
N2 C27 H27B 109.4 . . ?
C26 C27 H27B 109.4 . . ?
H27A C27 H27B 108 . . ?
N2 C13 C14 112.7(3) . . ?
N2 C13 H13A 109 . . ?
C14 C13 H13A 109 . . ?
N2 C13 H13B 109 . . ?
C14 C13 H13B 109 . . ?
H13A C13 H13B 107.8 . . ?
C15 C14 C20 118.7(4) . . ?
C15 C14 C13 123.0(4) . . ?
C20 C14 C13 118.3(4) . . ?
C16 C15 C14 122.4(5) . . ?
C16 C15 H15 118.8 . . ?
C14 C15 H15 118.8 . . ?
C18 C16 C15 117.4(4) . . ?
C18 C16 C17 120.7(5) . . ?
C15 C16 C17 121.9(5) . . ?
C16 C17 H17A 109.5 . . ?
C16 C17 H17B 109.5 . . ?
H17A C17 H17B 109.5 . . ?
C16 C17 H17C 109.5 . . ?
H17A C17 H17C 109.5 . . ?
H17B C17 H17C 109.5 . . ?
C16 C18 C19 122.5(4) . . ?
C16 C18 H18 118.7 . . ?
C19 C18 H18 118.7 . . ?
C18 C19 C20 118.9(4) . . ?
C18 C19 C21 123.0(4) . . ?
C20 C19 C21 118.0(4) . . ?
O1 C20 C14 119.8(4) . . ?
O1 C20 C19 120.1(4) . . ?
C14 C20 C19 120.1(4) . . ?
N5 C21 C19 113.4(3) . . ?
N5 C21 H21A 108.9 . . ?
C19 C21 H21A 108.9 . . ?
N5 C21 H21B 108.9 . . ?
C19 C21 H21B 108.9 . . ?
H21A C21 H21B 107.7 . . ?
N4 C7 C8 123.6(5) . . ?
N4 C7 H7 118.2 . . ?
C8 C7 H7 118.2 . . ?
C7 C8 C9 118.7(5) . . ?
C7 C8 H8 120.7 . . ?
C9 C8 H8 120.7 . . ?
C10 C9 C8 118.5(5) . . ?
C10 C9 H9 120.7 . . ?
C8 C9 H9 120.7 . . ?
C9 C10 C11 119.9(5) . . ?
C9 C10 H10 120.1 . . ?
C11 C10 H10 120.1 . . ?
N4 C11 C10 121.0(4) . . ?
N4 C11 C12 117.5(4) . . ?
C10 C11 C12 121.4(4) . . ?
N5 C12 C11 113.9(3) . . ?
N5 C12 H12A 108.8 . . ?
C11 C12 H12A 108.8 . . ?
N5 C12 H12B 108.8 . . ?
C11 C12 H12B 108.8 . . ?
H12A C12 H12B 107.7 . . ?
N6 C28 C29 122.2(4) . . ?
N6 C28 N8 114.7(4) . . ?
C29 C28 N8 123.1(4) . . ?
C30 C29 C28 118.3(4) . . ?
C30 C29 H29 120.9 . . ?
C28 C29 H29 120.9 . . ?
C29 C30 C31 120.7(4) . . ?
C29 C30 H30 119.7 . . ?
C31 C30 H30 119.7 . . ?
C30 C31 C32 118.5(4) . . ?
C30 C31 H31 120.7 . . ?
C32 C31 H31 120.7 . . ?
N6 C32 C31 121.8(4) . . ?
N6 C32 C33 117.9(4) . . ?
C31 C32 C33 120.3(4) . . ?
N5 C33 C32 112.4(3) . . ?
N5 C33 H33A 109.1 . . ?
C32 C33 H33A 109.1 . . ?
N5 C33 H33B 109.1 . . ?
C32 C33 H33B 109.1 . . ?
H33A C33 H33B 107.9 . . ?
O2A C1A O3A 126.6(4) . . ?
O2A C1A C2A 116.0(4) . . ?
O3A C1A C2A 117.4(4) . . ?
C1A C2A H2A1 109.5 . . ?
C1A C2A H2A2 109.5 . . ?
H2A1 C2A H2A2 109.5 . . ?
C1A C2A H2A3 109.5 . . ?
H2A1 C2A H2A3 109.5 . . ?
H2A2 C2A H2A3 109.5 . . ?
O3B C3A O2B 126.3(4) . . ?
O3B C3A C4A 115.6(4) . . ?
O2B C3A C4A 118.1(4) . . ?
C3A C4A H4A1 109.5 . . ?
C3A C4A H4A2 109.5 . . ?
H4A1 C4A H4A2 109.5 . . ?
C3A C4A H4A3 109.5 . . ?
H4A1 C4A H4A3 109.5 . . ?
H4A2 C4A H4A3 109.5 . . ?
O4 C34 N7 121.5(5) . . ?
O4 C34 C35 121.8(4) . . ?
N7 C34 C35 116.8(4) . . ?
C34 C35 C36C 108.7(4) . . ?
C34 C35 C36A 111.2(4) . . ?
C36C C35 C36A 109.7(5) . . ?
C34 C35 C36B 108.4(5) . . ?
C36C C35 C36B 108.0(5) . . ?
C36A C35 C36B 110.6(5) . . ?
C35 C36B H36A 109.5 . . ?
C35 C36B H36B 109.5 . . ?
H36A C36B H36B 109.5 . . ?
C35 C36B H36C 109.5 . . ?
H36A C36B H36C 109.5 . . ?
H36B C36B H36C 109.5 . . ?
C35 C36A H36D 109.5 . . ?
C35 C36A H36E 109.5 . . ?
H36D C36A H36E 109.5 . . ?
C35 C36A H36F 109.5 . . ?
H36D C36A H36F 109.5 . . ?
H36E C36A H36F 109.5 . . ?
C35 C36C H36G 109.5 . . ?
C35 C36C H36H 109.5 . . ?
H36G C36C H36H 109.5 . . ?
C35 C36C H36I 109.5 . . ?
H36G C36C H36I 109.5 . . ?
H36H C36C H36I 109.5 . . ?
O5 C37 N8 121.6(4) . . ?
O5 C37 C38 121.2(4) . . ?
N8 C37 C38 117.3(4) . . ?
C39C C38 C37 108.7(5) . . ?
C39C C38 C39B 108.6(6) . . ?
C37 C38 C39B 111.5(4) . . ?
C39C C38 C39A 112.3(6) . . ?
C37 C38 C39A 108.2(4) . . ?
C39B C38 C39A 107.5(6) . . ?
C38 C39A H39A 109.5 . . ?
C38 C39A H39B 109.5 . . ?
H39A C39A H39B 109.5 . . ?
C38 C39A H39C 109.5 . . ?
H39A C39A H39C 109.5 . . ?
H39B C39A H39C 109.5 . . ?
C38 C39B H39D 109.5 . . ?
C38 C39B H39E 109.5 . . ?
H39D C39B H39E 109.5 . . ?
C38 C39B H39F 109.5 . . ?
H39D C39B H39F 109.5 . . ?
H39E C39B H39F 109.5 . . ?
C38 C39C H39G 109.5 . . ?
C38 C39C H39H 109.5 . . ?
H39G C39C H39H 109.5 . . ?
C38 C39C H39I 109.5 . . ?
H39G C39C H39I 109.5 . . ?
H39H C39C H39I 109.5 . . ?
C5 N1 C1 118.0(4) . . ?
C5 N1 Zn1 114.1(3) . . ?
C1 N1 Zn1 124.4(3) . . ?
C26 N3 C22 118.4(4) . . ?
C26 N3 Zn1 110.2(3) . . ?
C22 N3 Zn1 131.4(3) . . ?
C27 N2 C6 111.8(3) . . ?
C27 N2 C13 110.1(3) . . ?
C6 N2 C13 110.5(3) . . ?
C27 N2 Zn1 104.3(3) . . ?
C6 N2 Zn1 108.6(2) . . ?
C13 N2 Zn1 111.4(2) . . ?
C11 N4 C7 118.2(4) . . ?
C11 N4 Zn2 114.4(3) . . ?
C7 N4 Zn2 126.8(3) . . ?
C28 N6 C32 118.3(4) . . ?
C28 N6 Zn2 130.1(3) . . ?
C32 N6 Zn2 108.7(3) . . ?
C12 N5 C33 110.9(3) . . ?
C12 N5 C21 111.4(3) . . ?
C33 N5 C21 110.0(3) . . ?
C12 N5 Zn2 108.0(2) . . ?
C33 N5 Zn2 104.9(2) . . ?
C21 N5 Zn2 111.5(2) . . ?
C34 N7 C22 126.9(4) . . ?
C34 N7 H7A 116.5 . . ?
C22 N7 H7A 116.5 . . ?
C37 N8 C28 124.8(4) . . ?
C37 N8 H8A 117.6 . . ?
C28 N8 H8A 117.6 . . ?
C20 O1 Zn2 121.0(2) . . ?
C20 O1 Zn1 123.7(2) . . ?
Zn2 O1 Zn1 115.23(13) . . ?
C1A O2A Zn1 141.7(3) . . ?
C1A O3A Zn2 124.5(3) . . ?
C3A O2B Zn1 124.6(3) . . ?
C3A O3B Zn2 142.1(3) . . ?
F2 P1 F3 87.1(4) . . ?
F2 P1 F4 91.8(3) . . ?
F3 P1 F4 93.3(3) . . ?
F2 P1 F5 178.1(3) . . ?
F3 P1 F5 92.2(4) . . ?
F4 P1 F5 89.9(3) . . ?
F2 P1 F1 87.2(3) . . ?
F3 P1 F1 88.9(3) . . ?
F4 P1 F1 177.5(4) . . ?
F5 P1 F1 91.1(3) . . ?
F2 P1 F6 93.8(4) . . ?
F3 P1 F6 178.1(4) . . ?
F4 P1 F6 88.4(3) . . ?
F5 P1 F6 86.9(3) . . ?
F1 P1 F6 89.4(3) . . ?
O1 Zn1 O2B 100.55(11) . . ?
O1 Zn1 O2A 89.64(11) . . ?
O2B Zn1 O2A 93.67(12) . . ?
O1 Zn1 N1 89.95(12) . . ?
O2B Zn1 N1 93.57(12) . . ?
O2A Zn1 N1 172.71(13) . . ?
O1 Zn1 N2 87.20(11) . . ?
O2B Zn1 N2 168.98(12) . . ?
O2A Zn1 N2 94.21(12) . . ?
N1 Zn1 N2 78.50(13) . . ?
O1 Zn1 N3 160.92(12) . . ?
O2B Zn1 N3 97.91(12) . . ?
O2A Zn1 N3 84.38(12) . . ?
N1 Zn1 N3 93.70(12) . . ?
N2 Zn1 N3 75.23(12) . . ?
O1 Zn1 Zn2 32.15(8) . . ?
O2B Zn1 Zn2 79.21(8) . . ?
O2A Zn1 Zn2 67.37(8) . . ?
N1 Zn1 Zn2 115.02(9) . . ?
N2 Zn1 Zn2 111.00(9) . . ?
N3 Zn1 Zn2 151.21(9) . . ?
O1 Zn2 O3A 101.25(11) . . ?
O1 Zn2 O3B 90.00(11) . . ?
O3A Zn2 O3B 94.51(13) . . ?
O1 Zn2 N4 93.20(12) . . ?
O3A Zn2 N4 91.69(13) . . ?
O3B Zn2 N4 172.34(13) . . ?
O1 Zn2 N5 88.29(12) . . ?
O3A Zn2 N5 167.15(12) . . ?
O3B Zn2 N5 94.07(13) . . ?
N4 Zn2 N5 79.09(13) . . ?
O1 Zn2 N6 159.77(12) . . ?
O3A Zn2 N6 97.24(12) . . ?
O3B Zn2 N6 80.38(12) . . ?
N4 Zn2 N6 94.39(13) . . ?
N5 Zn2 N6 74.81(12) . . ?
O1 Zn2 Zn1 32.61(7) . . ?
O3A Zn2 Zn1 79.73(8) . . ?
O3B Zn2 Zn1 67.60(8) . . ?
N4 Zn2 Zn1 118.09(9) . . ?
N5 Zn2 Zn1 112.45(9) . . ?
N6 Zn2 Zn1 147.36(9) . . ?
C41 C40 H40C 109.4 . . ?
C41 C40 H40B 108.9 . . ?
H40C C40 H40B 109.5 . . ?
C41 C40 H40A 110.1 . . ?
H40C C40 H40A 109.5 . . ?
H40B C40 H40A 109.5 . . ?
O6 C41 C42 121.9(19) . . ?
O6 C41 C40 113.8(18) . . ?
C42 C41 C40 123.6(17) . . ?
C41 C42 H42A 109.4 . . ?
C41 C42 H42B 109.2 . . ?
H42A C42 H42B 109.5 . . ?
C41 C42 H42C 109.8 . . ?
H42A C42 H42C 109.5 . . ?
H42B C42 H42C 109.5 . . ?
 
loop_
    _geom_hbond_atom_site_label_D
    _geom_hbond_atom_site_label_H
    _geom_hbond_atom_site_label_A
    _geom_hbond_distance_DH
    _geom_hbond_distance_HA
    _geom_hbond_distance_DA
    _geom_hbond_angle_DHA
    _geom_hbond_site_symmetry_A
N8 H8A O3A 0.86 2.16 2.977(5) 159.2 .
N7 H7A O2B 0.86 2.14 2.982(4) 164.9 .
 
# END of CIF


 
#------------------  SECTION 2. COMPOUND(S) DETAILS -------------------------#
 
data_919sb9
 
_audit_creation_date                    2014-04-22T12:19:13-00:00
_audit_creation_method                  'WinGX routine CIF_UPDATE'
_audit_conform_dict_name                cif_core.dic
_audit_conform_dict_version             2.4
_audit_conform_dict_location            ftp://ftp.iucr.org/pub/cif_core.dic
_publ_requested_category                FM
 
#----------------------------------------------------------------------------#
#                   CHEMICAL INFORMATION                                     #
#----------------------------------------------------------------------------#
 
_chemical_name_systematic
;
 ?
;
_chemical_formula_moiety            'C37 H41 N8 O5 Zn2, F6 P'
_chemical_formula_sum                   'C37 H41 F6 N8 O5 P Zn2'
_chemical_formula_weight                953.49
_chemical_compound_source               'synthesis as described'
_chemical_absolute_configuration        ad
 
#----------------------------------------------------------------------------#
#                   UNIT CELL INFORMATION                                    #
#----------------------------------------------------------------------------#
 
_symmetry_cell_setting                  orthorhombic
_symmetry_space_group_name_H-M          'P 21 21 21'
_symmetry_space_group_name_Hall         'P 2ac 2ab'
_symmetry_Int_Tables_number             19
loop_
    _symmetry_equiv_pos_as_xyz
'x, y, z'
'-x+1/2, -y, z+1/2'
'x+1/2, -y+1/2, -z'
'-x, y+1/2, -z+1/2'
 
_cell_length_a                          11.1444(6)
_cell_length_b                          17.0144(9)
_cell_length_c                          20.6731(8)
_cell_angle_alpha                       90
_cell_angle_beta                        90
_cell_angle_gamma                       90
_cell_volume                            3919.9(3)
_cell_formula_units_Z                   4
_cell_measurement_temperature           200(2)
_cell_measurement_reflns_used           2621
_cell_measurement_theta_min             3.643
_cell_measurement_theta_max             24.953
_cell_measurement_wavelength            0.71073
 
#----------------------------------------------------------------------------#
#                   CRYSTAL INFORMATION                                      #
#----------------------------------------------------------------------------#
 
_exptl_crystal_description              prism
_exptl_crystal_colour                   colourless
_exptl_crystal_size_max                 0.4
_exptl_crystal_size_mid                 0.4
_exptl_crystal_size_min                 0.2
_exptl_crystal_density_diffrn           1.616
_exptl_crystal_density_method           'not measured'
_exptl_crystal_F_000                    1952
_exptl_special_details
;
 ?
;
 
#----------------------------------------------------------------------------#
#                   ABSORPTION CORRECTION                                    #
#----------------------------------------------------------------------------#
 
_exptl_absorpt_coefficient_mu           1.348
_exptl_absorpt_correction_type          multi-scan
_exptl_absorpt_process_details
;
        CrysAlisPro, Agilent Technologies,
        Version 1.171.36.24 (release 03-12-2012 CrysAlis171 .NET)
        (compiled Dec  3 2012,18:21:49)
        Empirical absorption correction using spherical harmonics,
 implemented in SCALE3 ABSPACK scaling algorithm.
;
_exptl_absorpt_correction_T_min         0.94815
_exptl_absorpt_correction_T_max         1
 
#----------------------------------------------------------------------------#
#                   DATA COLLECTION                                          #
#----------------------------------------------------------------------------#
 
_diffrn_ambient_temperature             200(2)
_diffrn_radiation_wavelength            0.71073
_diffrn_radiation_type                  MoK\a
_diffrn_radiation_monochromator         graphite
_diffrn_radiation_probe                 x-ray
_diffrn_detector_area_resol_mean        16.0696
_diffrn_orient_matrix_ub_11             0.0098309
_diffrn_orient_matrix_ub_12             0.0345895
_diffrn_orient_matrix_ub_13             -0.018407
_diffrn_orient_matrix_ub_21             0.062935
_diffrn_orient_matrix_ub_22             -0.0064286
_diffrn_orient_matrix_ub_23             0.0014156
_diffrn_orient_matrix_ub_31             -0.0031769
_diffrn_orient_matrix_ub_32             -0.0222412
_diffrn_orient_matrix_ub_33             -0.0289007
_diffrn_measurement_device_type         'Xcalibur, Sapphire3, Gemini ultra'
_diffrn_measurement_method              '\w scans'
_diffrn_reflns_av_R_equivalents         0.0383
_diffrn_reflns_av_unetI/netI            0.0759
_diffrn_reflns_number                   10212
_diffrn_reflns_limit_h_min              -13
_diffrn_reflns_limit_h_max              12
_diffrn_reflns_limit_k_min              -20
_diffrn_reflns_limit_k_max              11
_diffrn_reflns_limit_l_min              -24
_diffrn_reflns_limit_l_max              23
_diffrn_reflns_theta_min                2.94
_diffrn_reflns_theta_max                25
_diffrn_reflns_theta_full               25
_diffrn_measured_fraction_theta_full
                                        0.998
_diffrn_measured_fraction_theta_max
                                        0.998
_reflns_number_total                    6482
_reflns_number_gt                       5544
_reflns_threshold_expression            >2\s(I)
 
#----------------------------------------------------------------------------#
#                   COMPUTER PROGRAMS USED                                   #
#----------------------------------------------------------------------------#
 
_computing_data_collection
;
        CrysAlisPro, Agilent Technologies,
        Version 1.171.36.24 (release 03-12-2012 CrysAlis171 .NET)
        (compiled Dec  3 2012,18:21:49)
;
_computing_cell_refinement
;
        CrysAlisPro, Agilent Technologies,
        Version 1.171.36.24 (release 03-12-2012 CrysAlis171 .NET)
        (compiled Dec  3 2012,18:21:49)
;
_computing_data_reduction
;
        CrysAlisPro, Agilent Technologies,
        Version 1.171.36.24 (release 03-12-2012 CrysAlis171 .NET)
        (compiled Dec  3 2012,18:21:49)
;
_computing_structure_refinement         'SHELXL-97 (Sheldrick, 2008)'
_computing_molecular_graphics           'Ortep-3 for Windows (Farrugia, 1997)'
_computing_publication_material
                                   'WinGX publication routines (Farrugia, 1999)'
 
#----------------------------------------------------------------------------#
#                   STRUCTURE SOLUTION
#----------------------------------------------------------------------------#
 
_atom_sites_solution_primary            direct
_atom_sites_solution_secondary          difmap
_atom_sites_solution_hydrogens          geom
 
#----------------------------------------------------------------------------#
#                   REFINEMENT INFORMATION                                   #
#----------------------------------------------------------------------------#
 
_refine_special_details
;
 Refinement of F^2^ against ALL reflections.  The weighted R-factor wR and
 goodness of fit S are based on F^2^, conventional R-factors R are based
 on F, with F set to zero for negative F^2^. The threshold expression of
 F^2^ > 2\s(F^2^) is used only for calculating R-factors(gt) etc. and is
 not relevant to the choice of reflections for refinement.  R-factors based
 on F^2^ are statistically about twice as large as those based on F, and R-
 factors based on ALL data will be even larger.
;
_refine_ls_structure_factor_coef        Fsqd
_refine_ls_matrix_type                  full
_refine_ls_weighting_scheme             calc
_refine_ls_weighting_details
         'calc w=1/[\s^2^(Fo^2^)+(0.0600P)^2^+0.0000P] where P=(Fo^2^+2Fc^2^)/3'
_refine_ls_hydrogen_treatment           constr
_refine_ls_extinction_method            none
_refine_ls_number_reflns                6482
_refine_ls_number_parameters            533
_refine_ls_number_restraints            0
_refine_ls_R_factor_all                 0.0629
_refine_ls_R_factor_gt                  0.0523
_refine_ls_wR_factor_ref                0.1263
_refine_ls_wR_factor_gt                 0.1185
_refine_ls_goodness_of_fit_ref          1.025
_refine_ls_restrained_S_all             1.025
_refine_ls_shift/su_max                 0.001
_refine_ls_shift/su_mean                0
_refine_ls_abs_structure_details
                                    'Flack H D (1983), Acta Cryst. A39, 876-881'
_refine_ls_abs_structure_Flack          0
_refine_diff_density_max                1.087
_refine_diff_density_min                -0.363
_refine_diff_density_rms                0.076
 
#----------------------------------------------------------------------------#
#                   ATOMIC TYPES, COORDINATES AND THERMAL PARAMETERS         #
#----------------------------------------------------------------------------#
 
loop_
    _atom_type_symbol
    _atom_type_description
    _atom_type_scat_dispersion_real
    _atom_type_scat_dispersion_imag
    _atom_type_scat_source
C C 0.0033 0.0016 'International Tables Vol C Tables 4.2.6.8 and 6.1.1.4'
H H 0 0 'International Tables Vol C Tables 4.2.6.8 and 6.1.1.4'
N N 0.0061 0.0033 'International Tables Vol C Tables 4.2.6.8 and 6.1.1.4'
O O 0.0106 0.006 'International Tables Vol C Tables 4.2.6.8 and 6.1.1.4'
F F 0.0171 0.0103 'International Tables Vol C Tables 4.2.6.8 and 6.1.1.4'
P P 0.1023 0.0942 'International Tables Vol C Tables 4.2.6.8 and 6.1.1.4'
Zn Zn 0.2839 1.4301 'International Tables Vol C Tables 4.2.6.8 and 6.1.1.4'
 
loop_
    _atom_site_label
    _atom_site_type_symbol
    _atom_site_fract_x
    _atom_site_fract_y
    _atom_site_fract_z
    _atom_site_U_iso_or_equiv
    _atom_site_adp_type
    _atom_site_occupancy
    _atom_site_symmetry_multiplicity
    _atom_site_calc_flag
    _atom_site_refinement_flags
    _atom_site_disorder_assembly
    _atom_site_disorder_group
C1 C 0.1813(6) -0.1383(5) 0.4863(3) 0.0493(18) Uani 1 1 d . . .
H1 H 0.1896 -0.1013 0.519 0.059 Uiso 1 1 calc R . .
C1A C 0.4885(5) 0.1145(4) 0.3581(3) 0.0374(15) Uani 1 1 d . . .
C2 C 0.0856(7) -0.1881(5) 0.4867(4) 0.057(2) Uani 1 1 d . . .
H2 H 0.028 -0.1842 0.5192 0.069 Uiso 1 1 calc R . .
C2A C 0.6022(6) 0.1569(5) 0.3392(4) 0.064(2) Uani 1 1 d . . .
H2A1 H 0.5821 0.2049 0.3172 0.096 Uiso 1 1 calc R . .
H2A2 H 0.6488 0.1241 0.311 0.096 Uiso 1 1 calc R . .
H2A3 H 0.648 0.1688 0.3773 0.096 Uiso 1 1 calc R . .
C3 C 0.0747(7) -0.2418(4) 0.4410(4) 0.064(2) Uani 1 1 d . . .
H3 H 0.0109 -0.277 0.4422 0.077 Uiso 1 1 calc R . .
C3A C 0.3203(6) 0.0599(4) 0.5183(3) 0.0369(15) Uani 1 1 d . . .
C4 C 0.1560(6) -0.2462(4) 0.3922(3) 0.0475(17) Uani 1 1 d . . .
H4 H 0.1477 -0.2831 0.3594 0.057 Uiso 1 1 calc R . .
C4A C 0.3171(8) 0.0758(5) 0.5905(3) 0.067(2) Uani 1 1 d . . .
H4A1 H 0.3589 0.0347 0.6129 0.1 Uiso 1 1 calc R . .
H4A2 H 0.2352 0.0775 0.6049 0.1 Uiso 1 1 calc R . .
H4A3 H 0.3551 0.1253 0.5993 0.1 Uiso 1 1 calc R . .
C5 C 0.2498(5) -0.1953(3) 0.3926(3) 0.0314(14) Uani 1 1 d . . .
C6 C 0.3481(7) -0.1982(4) 0.3434(3) 0.0416(17) Uani 1 1 d . . .
H6A H 0.4144 -0.2287 0.3605 0.05 Uiso 1 1 calc R . .
H6B H 0.319 -0.2245 0.3049 0.05 Uiso 1 1 calc R . .
C7 C 0.6221(7) -0.0957(4) 0.4755(4) 0.0552(19) Uani 1 1 d . . .
H7 H 0.595 -0.0706 0.5127 0.066 Uiso 1 1 calc R . .
C8 C 0.7333(8) -0.1295(5) 0.4736(4) 0.067(2) Uani 1 1 d . . .
H8 H 0.7835 -0.1258 0.5094 0.081 Uiso 1 1 calc R . .
C9 C 0.7710(8) -0.1682(6) 0.4205(5) 0.080(3) Uani 1 1 d . . .
H9 H 0.8455 -0.1927 0.4207 0.096 Uiso 1 1 calc R . .
C10 C 0.7009(6) -0.1716(5) 0.3665(4) 0.060(2) Uani 1 1 d . . .
H10 H 0.7258 -0.1986 0.3298 0.072 Uiso 1 1 calc R . .
C11 C 0.5918(6) -0.1335(4) 0.3685(3) 0.0470(17) Uani 1 1 d . . .
C12 C 0.5172(6) -0.1246(5) 0.3104(3) 0.0482(17) Uani 1 1 d . . .
H12A H 0.5404 -0.0771 0.2877 0.058 Uiso 1 1 calc R . .
H12B H 0.5312 -0.1688 0.2817 0.058 Uiso 1 1 calc R . .
C13 C 0.3206(6) -0.0869(4) 0.2725(3) 0.0376(16) Uani 1 1 d . . .
H13A H 0.353 -0.0356 0.2618 0.045 Uiso 1 1 calc R . .
H13B H 0.3289 -0.1202 0.2347 0.045 Uiso 1 1 calc R . .
C14 C 0.1929(6) -0.0787(4) 0.2882(3) 0.0334(15) Uani 1 1 d . . .
C15 C 0.1061(6) -0.1156(4) 0.2527(3) 0.0369(15) Uani 1 1 d . . .
H15 H 0.1294 -0.149 0.2194 0.044 Uiso 1 1 calc R . .
C16 C -0.0131(6) -0.1054(4) 0.2643(3) 0.0419(16) Uani 1 1 d . . .
C17 C -0.1053(7) -0.1433(4) 0.2231(3) 0.060(2) Uani 1 1 d . . .
H17A H -0.0667 -0.173 0.1895 0.09 Uiso 1 1 calc R . .
H17B H -0.1553 -0.1036 0.204 0.09 Uiso 1 1 calc R . .
H17C H -0.1536 -0.1778 0.249 0.09 Uiso 1 1 calc R . .
C18 C -0.0443(6) -0.0590(3) 0.3161(3) 0.0383(15) Uani 1 1 d . . .
H18 H -0.1251 -0.0529 0.3262 0.046 Uiso 1 1 calc R . .
C19 C 0.0402(5) -0.0214(3) 0.3535(3) 0.0307(14) Uani 1 1 d . . .
C20 C 0.1597(5) -0.0304(3) 0.3380(3) 0.0301(13) Uani 1 1 d . . .
C21 C 0.0064(6) 0.0271(3) 0.4098(3) 0.0373(14) Uani 1 1 d . . .
H21A H -0.0792 0.0221 0.4173 0.045 Uiso 1 1 calc R . .
H21B H 0.0476 0.0076 0.4479 0.045 Uiso 1 1 calc R . .
C22 C 0.2069(7) 0.1365(4) 0.2294(3) 0.0505(19) Uani 1 1 d . . .
C23 C 0.1504(11) 0.1170(5) 0.1723(3) 0.076(3) Uani 1 1 d . . .
H23 H 0.1937 0.1132 0.134 0.091 Uiso 1 1 calc R . .
C24 C 0.0348(12) 0.1039(5) 0.1731(4) 0.078(3) Uani 1 1 d . . .
H24 H -0.0051 0.0899 0.1353 0.094 Uiso 1 1 calc R . .
C25 C -0.0269(8) 0.1109(4) 0.2303(4) 0.061(2) Uani 1 1 d . . .
H25 H -0.1092 0.102 0.2318 0.073 Uiso 1 1 calc R . .
C26 C 0.0329(6) 0.1308(4) 0.2836(3) 0.0405(15) Uani 1 1 d . . .
C27 C -0.0287(6) 0.1439(4) 0.3470(3) 0.0392(15) Uani 1 1 d . . .
H27A H -0.0381 0.1999 0.354 0.047 Uiso 1 1 calc R . .
H27B H -0.1082 0.1208 0.3453 0.047 Uiso 1 1 calc R . .
C28 C 0.2361(5) 0.3033(3) 0.4221(3) 0.0323(13) Uani 1 1 d . . .
C29 C 0.1980(6) 0.3695(4) 0.4549(3) 0.0419(16) Uani 1 1 d . . .
H29 H 0.2431 0.4155 0.4548 0.05 Uiso 1 1 calc R . .
C30 C 0.0947(7) 0.3650(4) 0.4867(3) 0.056(2) Uani 1 1 d . . .
H30 H 0.0646 0.4093 0.5075 0.067 Uiso 1 1 calc R . .
C31 C 0.0325(7) 0.2965(4) 0.4891(3) 0.0493(19) Uani 1 1 d . . .
H31 H -0.0377 0.293 0.5133 0.059 Uiso 1 1 calc R . .
C32 C 0.0736(6) 0.2331(4) 0.4559(3) 0.0383(15) Uani 1 1 d . . .
C33 C 0.0142(6) 0.1554(4) 0.4596(3) 0.0388(16) Uani 1 1 d . . .
H33A H 0.0446 0.1267 0.4967 0.047 Uiso 1 1 calc R . .
H33B H -0.0715 0.1626 0.4654 0.047 Uiso 1 1 calc R . .
N1 N 0.2636(5) -0.1421(3) 0.4392(2) 0.0354(12) Uani 1 1 d . . .
N2 N 0.3907(5) -0.1207(3) 0.3260(2) 0.0372(12) Uani 1 1 d . . .
N3 N 0.5524(5) -0.0995(3) 0.4222(3) 0.0423(13) Uani 1 1 d . . .
N4 N 0.1511(5) 0.1416(3) 0.2854(2) 0.0360(12) Uani 1 1 d . . .
N5 N 0.0363(4) 0.1105(3) 0.4008(2) 0.0310(11) Uani 1 1 d . . .
N6 N 0.1763(4) 0.2365(3) 0.4223(2) 0.0266(11) Uani 1 1 d . . .
N7 N 0.3201(7) 0.1549(5) 0.2277(3) 0.094(3) Uani 1 1 d . . .
H7A H 0.356 0.1697 0.2625 0.112 Uiso 1 1 calc R . .
H7B H 0.3591 0.1522 0.1919 0.112 Uiso 1 1 calc R . .
N8 N 0.3376(6) 0.3084(4) 0.3878(3) 0.074(2) Uani 1 1 d . . .
H8A H 0.3631 0.2684 0.3664 0.089 Uiso 1 1 calc R . .
H8B H 0.3775 0.3517 0.3872 0.089 Uiso 1 1 calc R . .
O1 O 0.2412(4) 0.0094(2) 0.37131(16) 0.0322(9) Uani 1 1 d . . .
O2A O 0.4952(4) 0.0452(3) 0.3735(2) 0.0434(11) Uani 1 1 d . . .
O2B O 0.3757(4) -0.0002(3) 0.50189(18) 0.0445(11) Uani 1 1 d . . .
O3A O 0.3936(4) 0.1554(2) 0.3574(2) 0.0415(10) Uani 1 1 d . . .
O3B O 0.2713(4) 0.1065(2) 0.48300(18) 0.0431(11) Uani 1 1 d . . .
F1 F -0.0603(9) -0.0616(5) 0.7080(2) 0.173(4) Uani 1 1 d . . .
F2 F -0.0845(9) -0.1231(3) 0.6185(3) 0.157(3) Uani 1 1 d . . .
F3 F -0.2096(6) -0.0313(7) 0.6429(4) 0.195(5) Uani 1 1 d . . .
F4 F -0.0568(11) 0.0454(4) 0.6542(4) 0.211(5) Uani 1 1 d . . .
F5 F 0.0573(6) -0.0486(6) 0.6303(4) 0.178(4) Uani 1 1 d . . .
F6 F -0.0859(6) -0.0156(4) 0.5662(2) 0.109(2) Uani 1 1 d . . .
P1 P -0.0776(2) -0.03982(13) 0.63813(9) 0.0605(6) Uani 1 1 d . . .
Zn1 Zn 0.38254(7) -0.04328(4) 0.41153(3) 0.03425(19) Uani 1 1 d . . .
Zn2 Zn 0.22696(6) 0.12514(4) 0.38477(3) 0.02856(17) Uani 1 1 d . . .
 
loop_
    _atom_site_aniso_label
    _atom_site_aniso_U_11
    _atom_site_aniso_U_22
    _atom_site_aniso_U_33
    _atom_site_aniso_U_23
    _atom_site_aniso_U_13
    _atom_site_aniso_U_12
C1 0.054(4) 0.051(5) 0.043(4) 0.010(4) -0.004(3) 0.003(4)
C1A 0.028(3) 0.036(4) 0.048(3) -0.007(3) -0.002(3) -0.002(3)
C2 0.046(5) 0.055(5) 0.071(5) 0.015(4) 0.009(4) 0.009(4)
C2A 0.039(4) 0.060(5) 0.093(5) 0.012(5) 0.023(4) 0.001(4)
C3 0.045(5) 0.035(4) 0.113(7) 0.013(5) -0.002(5) -0.004(4)
C3A 0.045(4) 0.040(4) 0.026(3) -0.006(3) -0.006(3) -0.007(3)
C4 0.051(4) 0.031(4) 0.060(4) -0.010(3) -0.014(4) -0.001(3)
C4A 0.113(7) 0.058(5) 0.030(3) -0.012(4) -0.003(4) 0.012(5)
C5 0.034(4) 0.024(3) 0.036(3) 0.001(3) -0.003(3) 0.004(3)
C6 0.065(5) 0.021(3) 0.039(3) -0.002(3) -0.006(3) 0.005(3)
C7 0.053(4) 0.037(4) 0.076(5) 0.018(4) -0.031(4) -0.004(4)
C8 0.057(5) 0.068(6) 0.077(5) 0.030(5) -0.023(4) -0.014(5)
C9 0.037(4) 0.083(7) 0.119(7) 0.042(6) -0.026(5) -0.006(5)
C10 0.034(4) 0.054(5) 0.093(6) -0.009(4) 0.007(4) -0.004(4)
C11 0.039(4) 0.033(4) 0.069(4) -0.008(4) -0.004(3) 0.004(3)
C12 0.048(4) 0.049(4) 0.048(4) -0.014(4) 0.003(3) 0.010(4)
C13 0.055(4) 0.032(4) 0.025(3) 0.000(3) -0.002(3) 0.006(3)
C14 0.047(4) 0.025(3) 0.028(3) 0.005(3) 0.001(3) 0.000(3)
C15 0.054(4) 0.027(3) 0.030(3) 0.003(3) -0.001(3) 0.004(3)
C16 0.052(4) 0.034(4) 0.040(3) 0.001(3) -0.003(3) -0.011(3)
C17 0.066(5) 0.055(5) 0.059(4) -0.012(4) -0.014(4) -0.022(5)
C18 0.039(4) 0.031(4) 0.045(3) 0.006(3) -0.004(3) -0.006(3)
C19 0.041(3) 0.023(3) 0.028(3) 0.000(3) 0.005(3) -0.014(3)
C20 0.034(3) 0.024(3) 0.032(3) 0.000(3) -0.012(2) -0.004(3)
C21 0.038(3) 0.026(3) 0.048(3) 0.003(3) 0.008(3) -0.009(3)
C22 0.062(5) 0.043(4) 0.046(4) 0.009(3) 0.017(4) 0.014(4)
C23 0.144(10) 0.050(5) 0.033(4) -0.002(4) 0.006(5) 0.024(7)
C24 0.136(10) 0.050(5) 0.049(5) 0.002(4) -0.026(6) 0.024(7)
C25 0.075(6) 0.047(5) 0.060(5) 0.002(4) -0.031(4) 0.009(4)
C26 0.060(4) 0.023(3) 0.038(3) 0.002(3) -0.016(3) 0.000(4)
C27 0.032(3) 0.036(4) 0.050(4) 0.004(3) -0.002(3) 0.003(3)
C28 0.028(3) 0.032(3) 0.037(3) 0.003(3) 0.006(3) 0.003(3)
C29 0.054(4) 0.025(3) 0.046(3) -0.004(3) -0.003(3) -0.004(3)
C30 0.075(6) 0.034(4) 0.059(4) -0.015(4) 0.016(4) 0.005(4)
C31 0.050(4) 0.043(4) 0.055(4) -0.016(4) 0.027(4) -0.003(4)
C32 0.042(4) 0.032(4) 0.041(3) -0.002(3) 0.007(3) 0.003(3)
C33 0.036(3) 0.043(4) 0.038(3) -0.008(3) 0.017(3) -0.002(3)
N1 0.042(3) 0.029(3) 0.034(2) 0.007(2) -0.004(2) -0.008(3)
N2 0.044(3) 0.033(3) 0.035(2) -0.002(2) -0.001(2) 0.000(3)
N3 0.045(3) 0.029(3) 0.053(3) 0.002(3) -0.003(3) 0.003(3)
N4 0.040(3) 0.030(3) 0.038(3) 0.000(2) -0.004(2) 0.008(3)
N5 0.033(3) 0.027(3) 0.032(2) -0.008(2) 0.007(2) 0.001(2)
N6 0.025(2) 0.023(2) 0.032(2) 0.001(2) 0.005(2) 0.004(2)
N7 0.087(6) 0.126(8) 0.068(4) 0.033(5) 0.027(4) 0.033(6)
N8 0.081(5) 0.045(4) 0.097(5) -0.008(4) 0.010(4) -0.005(4)
O1 0.038(2) 0.025(2) 0.035(2) -0.0035(17) -0.0084(18) 0.0008(19)
O2A 0.036(2) 0.032(2) 0.062(3) 0.000(2) -0.002(2) 0.000(2)
O2B 0.057(3) 0.041(3) 0.036(2) -0.012(2) -0.010(2) 0.009(3)
O3A 0.033(2) 0.028(2) 0.064(3) -0.003(2) 0.012(2) 0.000(2)
O3B 0.062(3) 0.034(2) 0.034(2) -0.005(2) -0.017(2) 0.001(2)
F1 0.275(10) 0.185(8) 0.061(3) 0.036(4) -0.004(4) 0.074(8)
F2 0.257(10) 0.046(3) 0.169(6) 0.004(4) -0.016(7) -0.002(5)
F3 0.093(5) 0.301(13) 0.192(7) 0.082(8) 0.054(5) 0.062(7)
F4 0.357(15) 0.073(4) 0.203(8) -0.049(5) -0.131(9) 0.036(7)
F5 0.094(5) 0.229(10) 0.211(8) 0.093(7) -0.045(5) 0.021(6)
F6 0.129(5) 0.130(5) 0.067(3) 0.026(3) -0.007(3) 0.009(4)
P1 0.0796(15) 0.0504(12) 0.0514(10) -0.0015(10) -0.0166(10) 0.0121(12)
Zn1 0.0422(4) 0.0262(4) 0.0343(3) -0.0037(3) -0.0075(3) 0.0036(3)
Zn2 0.0286(3) 0.0234(3) 0.0337(3) -0.0015(3) 0.0021(3) -0.0001(3)
 
 
#----------------------------------------------------------------------------#
#                   MOLECULAR GEOMETRY                                       #
#----------------------------------------------------------------------------#
 
_geom_special_details
;
 All s.u.'s (except the s.u. in the dihedral angle between two l.s. planes)
 are estimated using the full covariance matrix.  The cell s.u.'s are taken
 into account individually in the estimation of s.u.'s in distances, angles
 and torsion angles; correlations between s.u.'s in cell parameters are only
 used when they are defined by crystal symmetry.  An approximate (isotropic)
 treatment of cell s.u.'s is used for estimating s.u.'s involving l.s. planes.
;
loop_
    _geom_bond_atom_site_label_1
    _geom_bond_atom_site_label_2
    _geom_bond_distance
    _geom_bond_site_symmetry_2
    _geom_bond_publ_flag
C1 N1 1.338(8) . ?
C1 C2 1.362(10) . ?
C1 H1 0.93 . ?
C1A O2A 1.224(8) . ?
C1A O3A 1.266(7) . ?
C1A C2A 1.510(9) . ?
C2 C3 1.321(11) . ?
C2 H2 0.93 . ?
C2A H2A1 0.96 . ?
C2A H2A2 0.96 . ?
C2A H2A3 0.96 . ?
C3 C4 1.358(10) . ?
C3 H3 0.93 . ?
C3A O3B 1.208(7) . ?
C3A O2B 1.241(7) . ?
C3A C4A 1.517(8) . ?
C4 C5 1.357(9) . ?
C4 H4 0.93 . ?
C4A H4A1 0.96 . ?
C4A H4A2 0.96 . ?
C4A H4A3 0.96 . ?
C5 N1 1.332(7) . ?
C5 C6 1.496(8) . ?
C6 N2 1.446(8) . ?
C6 H6A 0.97 . ?
C6 H6B 0.97 . ?
C7 N3 1.350(8) . ?
C7 C8 1.367(11) . ?
C7 H7 0.93 . ?
C8 C9 1.346(12) . ?
C8 H8 0.93 . ?
C9 C10 1.363(11) . ?
C9 H9 0.93 . ?
C10 C11 1.378(9) . ?
C10 H10 0.93 . ?
C11 N3 1.326(8) . ?
C11 C12 1.469(9) . ?
C12 N2 1.448(8) . ?
C12 H12A 0.97 . ?
C12 H12B 0.97 . ?
C13 C14 1.466(9) . ?
C13 N2 1.471(7) . ?
C13 H13A 0.97 . ?
C13 H13B 0.97 . ?
C14 C15 1.367(8) . ?
C14 C20 1.368(8) . ?
C15 C16 1.361(9) . ?
C15 H15 0.93 . ?
C16 C18 1.375(8) . ?
C16 C17 1.482(9) . ?
C17 H17A 0.96 . ?
C17 H17B 0.96 . ?
C17 H17C 0.96 . ?
C18 C19 1.377(8) . ?
C18 H18 0.93 . ?
C19 C20 1.378(8) . ?
C19 C21 1.475(8) . ?
C20 O1 1.326(6) . ?
C21 N5 1.469(7) . ?
C21 H21A 0.97 . ?
C21 H21B 0.97 . ?
C22 N7 1.299(10) . ?
C22 N4 1.318(8) . ?
C22 C23 1.378(11) . ?
C23 C24 1.307(13) . ?
C23 H23 0.93 . ?
C24 C25 1.374(13) . ?
C24 H24 0.93 . ?
C25 C26 1.332(9) . ?
C25 H25 0.93 . ?
C26 N4 1.331(8) . ?
C26 C27 1.496(9) . ?
C27 N5 1.444(7) . ?
C27 H27A 0.97 . ?
C27 H27B 0.97 . ?
C28 N6 1.318(7) . ?
C28 N8 1.338(8) . ?
C28 C29 1.382(8) . ?
C29 C30 1.328(9) . ?
C29 H29 0.93 . ?
C30 C31 1.356(9) . ?
C30 H30 0.93 . ?
C31 C32 1.359(9) . ?
C31 H31 0.93 . ?
C32 N6 1.339(7) . ?
C32 C33 1.480(9) . ?
C33 N5 1.457(7) . ?
C33 H33A 0.97 . ?
C33 H33B 0.97 . ?
N1 Zn1 2.216(5) . ?
N2 Zn1 2.206(5) . ?
N3 Zn1 2.132(5) . ?
N4 Zn2 2.239(5) . ?
N5 Zn2 2.165(5) . ?
N6 Zn2 2.123(5) . ?
N7 H7A 0.86 . ?
N7 H7B 0.86 . ?
N8 H8A 0.86 . ?
N8 H8B 0.86 . ?
O1 Zn1 1.994(4) . ?
O1 Zn2 1.995(4) . ?
O2A Zn1 2.112(4) . ?
O2B Zn1 2.008(4) . ?
O3A Zn2 2.008(4) . ?
O3B Zn2 2.114(4) . ?
F1 P1 1.504(5) . ?
F2 P1 1.476(6) . ?
F3 P1 1.482(7) . ?
F4 P1 1.505(7) . ?
F5 P1 1.519(7) . ?
F6 P1 1.546(5) . ?
Zn1 Zn2 3.3948(10) . ?
 
loop_
    _geom_angle_atom_site_label_1
    _geom_angle_atom_site_label_2
    _geom_angle_atom_site_label_3
    _geom_angle
    _geom_angle_site_symmetry_1
    _geom_angle_site_symmetry_3
    _geom_angle_publ_flag
N1 C1 C2 120.8(7) . . ?
N1 C1 H1 119.6 . . ?
C2 C1 H1 119.6 . . ?
O2A C1A O3A 125.7(6) . . ?
O2A C1A C2A 118.5(6) . . ?
O3A C1A C2A 115.8(6) . . ?
C3 C2 C1 119.8(7) . . ?
C3 C2 H2 120.1 . . ?
C1 C2 H2 120.1 . . ?
C1A C2A H2A1 109.5 . . ?
C1A C2A H2A2 109.5 . . ?
H2A1 C2A H2A2 109.5 . . ?
C1A C2A H2A3 109.5 . . ?
H2A1 C2A H2A3 109.5 . . ?
H2A2 C2A H2A3 109.5 . . ?
C2 C3 C4 120.6(7) . . ?
C2 C3 H3 119.7 . . ?
C4 C3 H3 119.7 . . ?
O3B C3A O2B 126.9(5) . . ?
O3B C3A C4A 117.8(6) . . ?
O2B C3A C4A 115.3(6) . . ?
C5 C4 C3 118.4(7) . . ?
C5 C4 H4 120.8 . . ?
C3 C4 H4 120.8 . . ?
C3A C4A H4A1 109.5 . . ?
C3A C4A H4A2 109.5 . . ?
H4A1 C4A H4A2 109.5 . . ?
C3A C4A H4A3 109.5 . . ?
H4A1 C4A H4A3 109.5 . . ?
H4A2 C4A H4A3 109.5 . . ?
N1 C5 C4 121.8(6) . . ?
N1 C5 C6 115.5(5) . . ?
C4 C5 C6 122.7(6) . . ?
N2 C6 C5 112.3(5) . . ?
N2 C6 H6A 109.1 . . ?
C5 C6 H6A 109.1 . . ?
N2 C6 H6B 109.1 . . ?
C5 C6 H6B 109.1 . . ?
H6A C6 H6B 107.9 . . ?
N3 C7 C8 118.6(8) . . ?
N3 C7 H7 120.7 . . ?
C8 C7 H7 120.7 . . ?
C9 C8 C7 120.8(8) . . ?
C9 C8 H8 119.6 . . ?
C7 C8 H8 119.6 . . ?
C8 C9 C10 120.6(8) . . ?
C8 C9 H9 119.7 . . ?
C10 C9 H9 119.7 . . ?
C9 C10 C11 117.5(8) . . ?
C9 C10 H10 121.3 . . ?
C11 C10 H10 121.3 . . ?
N3 C11 C10 121.4(7) . . ?
N3 C11 C12 116.8(6) . . ?
C10 C11 C12 121.6(7) . . ?
N2 C12 C11 111.9(5) . . ?
N2 C12 H12A 109.2 . . ?
C11 C12 H12A 109.2 . . ?
N2 C12 H12B 109.2 . . ?
C11 C12 H12B 109.2 . . ?
H12A C12 H12B 107.9 . . ?
C14 C13 N2 112.7(5) . . ?
C14 C13 H13A 109 . . ?
N2 C13 H13A 109 . . ?
C14 C13 H13B 109 . . ?
N2 C13 H13B 109 . . ?
H13A C13 H13B 107.8 . . ?
C15 C14 C20 119.3(6) . . ?
C15 C14 C13 121.6(5) . . ?
C20 C14 C13 119.1(6) . . ?
C16 C15 C14 122.5(6) . . ?
C16 C15 H15 118.8 . . ?
C14 C15 H15 118.8 . . ?
C15 C16 C18 117.2(6) . . ?
C15 C16 C17 121.3(6) . . ?
C18 C16 C17 121.5(7) . . ?
C16 C17 H17A 109.5 . . ?
C16 C17 H17B 109.5 . . ?
H17A C17 H17B 109.5 . . ?
C16 C17 H17C 109.5 . . ?
H17A C17 H17C 109.5 . . ?
H17B C17 H17C 109.5 . . ?
C16 C18 C19 122.2(6) . . ?
C16 C18 H18 118.9 . . ?
C19 C18 H18 118.9 . . ?
C18 C19 C20 118.5(5) . . ?
C18 C19 C21 121.9(6) . . ?
C20 C19 C21 119.5(5) . . ?
O1 C20 C14 120.8(6) . . ?
O1 C20 C19 118.9(5) . . ?
C14 C20 C19 120.3(5) . . ?
N5 C21 C19 112.5(5) . . ?
N5 C21 H21A 109.1 . . ?
C19 C21 H21A 109.1 . . ?
N5 C21 H21B 109.1 . . ?
C19 C21 H21B 109.1 . . ?
H21A C21 H21B 107.8 . . ?
N7 C22 N4 117.7(7) . . ?
N7 C22 C23 118.6(8) . . ?
N4 C22 C23 123.6(8) . . ?
C24 C23 C22 118.8(8) . . ?
C24 C23 H23 120.6 . . ?
C22 C23 H23 120.6 . . ?
C23 C24 C25 119.3(9) . . ?
C23 C24 H24 120.4 . . ?
C25 C24 H24 120.4 . . ?
C26 C25 C24 118.9(8) . . ?
C26 C25 H25 120.5 . . ?
C24 C25 H25 120.5 . . ?
N4 C26 C25 123.6(7) . . ?
N4 C26 C27 114.2(5) . . ?
C25 C26 C27 122.2(7) . . ?
N5 C27 C26 112.7(5) . . ?
N5 C27 H27A 109.1 . . ?
C26 C27 H27A 109.1 . . ?
N5 C27 H27B 109.1 . . ?
C26 C27 H27B 109.1 . . ?
H27A C27 H27B 107.8 . . ?
N6 C28 N8 119.1(6) . . ?
N6 C28 C29 123.1(5) . . ?
N8 C28 C29 117.9(6) . . ?
C30 C29 C28 117.6(7) . . ?
C30 C29 H29 121.2 . . ?
C28 C29 H29 121.2 . . ?
C29 C30 C31 120.7(7) . . ?
C29 C30 H30 119.7 . . ?
C31 C30 H30 119.7 . . ?
C30 C31 C32 119.4(6) . . ?
C30 C31 H31 120.3 . . ?
C32 C31 H31 120.3 . . ?
N6 C32 C31 121.1(6) . . ?
N6 C32 C33 116.6(5) . . ?
C31 C32 C33 122.1(6) . . ?
N5 C33 C32 110.4(5) . . ?
N5 C33 H33A 109.6 . . ?
C32 C33 H33A 109.6 . . ?
N5 C33 H33B 109.6 . . ?
C32 C33 H33B 109.6 . . ?
H33A C33 H33B 108.1 . . ?
C5 N1 C1 118.7(6) . . ?
C5 N1 Zn1 113.4(4) . . ?
C1 N1 Zn1 124.2(5) . . ?
C6 N2 C12 109.5(6) . . ?
C6 N2 C13 111.6(5) . . ?
C12 N2 C13 111.5(5) . . ?
C6 N2 Zn1 109.4(3) . . ?
C12 N2 Zn1 104.3(4) . . ?
C13 N2 Zn1 110.3(4) . . ?
C11 N3 C7 120.9(6) . . ?
C11 N3 Zn1 113.8(4) . . ?
C7 N3 Zn1 125.0(5) . . ?
C22 N4 C26 115.7(6) . . ?
C22 N4 Zn2 128.3(5) . . ?
C26 N4 Zn2 112.4(4) . . ?
C27 N5 C33 110.6(5) . . ?
C27 N5 C21 111.4(5) . . ?
C33 N5 C21 111.2(5) . . ?
C27 N5 Zn2 109.2(4) . . ?
C33 N5 Zn2 103.5(3) . . ?
C21 N5 Zn2 110.7(4) . . ?
C28 N6 C32 118.1(5) . . ?
C28 N6 Zn2 129.3(4) . . ?
C32 N6 Zn2 112.3(4) . . ?
C22 N7 H7A 120 . . ?
C22 N7 H7B 120 . . ?
H7A N7 H7B 120 . . ?
C28 N8 H8A 120 . . ?
C28 N8 H8B 120 . . ?
H8A N8 H8B 120 . . ?
C20 O1 Zn1 121.9(3) . . ?
C20 O1 Zn2 121.5(4) . . ?
Zn1 O1 Zn2 116.65(18) . . ?
C1A O2A Zn1 138.4(4) . . ?
C3A O2B Zn1 125.0(4) . . ?
C1A O3A Zn2 129.0(4) . . ?
C3A O3B Zn2 141.7(4) . . ?
F2 P1 F3 93.4(7) . . ?
F2 P1 F1 92.0(5) . . ?
F3 P1 F1 95.0(5) . . ?
F2 P1 F4 173.4(6) . . ?
F3 P1 F4 92.5(7) . . ?
F1 P1 F4 90.3(5) . . ?
F2 P1 F5 85.9(6) . . ?
F3 P1 F5 177.7(5) . . ?
F1 P1 F5 87.2(5) . . ?
F4 P1 F5 88.1(6) . . ?
F2 P1 F6 89.4(4) . . ?
F3 P1 F6 88.7(4) . . ?
F1 P1 F6 175.9(5) . . ?
F4 P1 F6 88.0(4) . . ?
F5 P1 F6 89.1(4) . . ?
O1 Zn1 O2B 101.16(17) . . ?
O1 Zn1 O2A 89.65(16) . . ?
O2B Zn1 O2A 96.21(18) . . ?
O1 Zn1 N3 161.07(18) . . ?
O2B Zn1 N3 95.85(19) . . ?
O2A Zn1 N3 80.25(18) . . ?
O1 Zn1 N2 88.12(17) . . ?
O2B Zn1 N2 164.75(18) . . ?
O2A Zn1 N2 95.92(18) . . ?
N3 Zn1 N2 77.2(2) . . ?
O1 Zn1 N1 88.63(18) . . ?
O2B Zn1 N1 90.80(18) . . ?
O2A Zn1 N1 172.98(17) . . ?
N3 Zn1 N1 99.4(2) . . ?
N2 Zn1 N1 77.22(18) . . ?
O1 Zn1 Zn2 31.68(11) . . ?
O2B Zn1 Zn2 79.85(13) . . ?
O2A Zn1 Zn2 68.97(12) . . ?
N3 Zn1 Zn2 148.11(14) . . ?
N2 Zn1 Zn2 113.24(13) . . ?
N1 Zn1 Zn2 112.13(14) . . ?
O1 Zn2 O3A 98.04(17) . . ?
O1 Zn2 O3B 88.12(15) . . ?
O3A Zn2 O3B 95.33(19) . . ?
O1 Zn2 N6 162.28(16) . . ?
O3A Zn2 N6 96.92(17) . . ?
O3B Zn2 N6 81.08(16) . . ?
O1 Zn2 N5 89.20(17) . . ?
O3A Zn2 N5 168.57(18) . . ?
O3B Zn2 N5 93.73(18) . . ?
N6 Zn2 N5 77.61(18) . . ?
O1 Zn2 N4 91.46(16) . . ?
O3A Zn2 N4 93.36(18) . . ?
O3B Zn2 N4 171.27(19) . . ?
N6 Zn2 N4 97.09(17) . . ?
N5 Zn2 N4 77.55(18) . . ?
O1 Zn2 Zn1 31.67(11) . . ?
O3A Zn2 Zn1 77.87(12) . . ?
O3B Zn2 Zn1 66.26(12) . . ?
N6 Zn2 Zn1 146.02(12) . . ?
N5 Zn2 Zn1 112.29(13) . . ?
N4 Zn2 Zn1 116.60(13) . . ?
 
loop_
    _geom_hbond_atom_site_label_D
    _geom_hbond_atom_site_label_H
    _geom_hbond_atom_site_label_A
    _geom_hbond_distance_DH
    _geom_hbond_distance_HA
    _geom_hbond_distance_DA
    _geom_hbond_angle_DHA
    _geom_hbond_site_symmetry_A
N7 H7A O3A 0.86 2.02 2.803(9) 150.7 .
N8 H8A O3A 0.86 1.96 2.750(8) 151.9 .
 
# END of CIF

 
data_1069sb13
 
_audit_creation_date                    2014-04-22T13:08:17-00:00
_audit_creation_method                  'WinGX routine CIF_UPDATE'
_audit_conform_dict_name                cif_core.dic
_audit_conform_dict_version             2.4
_audit_conform_dict_location            ftp://ftp.iucr.org/pub/cif_core.dic
_publ_requested_category                FM
 
#----------------------------------------------------------------------------#
#                   CHEMICAL INFORMATION                                     #
#----------------------------------------------------------------------------#
 
_chemical_name_systematic
;
 ?
;
_chemical_formula_moiety               
'C49 H55 N9 O9 P Zn2, P F6, C H4 O, H2 O '
_chemical_formula_sum                   'C50 H61 F6 N9 O11 P2 Zn2'
_chemical_formula_weight                1270.76
_chemical_compound_source               'synthesis as described'
 
#----------------------------------------------------------------------------#
#                   UNIT CELL INFORMATION                                    #
#----------------------------------------------------------------------------#
 
_symmetry_cell_setting                  monoclinic
_symmetry_space_group_name_H-M          'P 1 21/n 1'
_symmetry_space_group_name_Hall         '-P 2yn'
_symmetry_Int_Tables_number             14
loop_
    _symmetry_equiv_pos_as_xyz
'x, y, z'
'-x+1/2, y+1/2, -z+1/2'
'-x, -y, -z'
'x-1/2, -y-1/2, z-1/2'
 
_cell_length_a                          14.5695(6)
_cell_length_b                          23.3831(8)
_cell_length_c                          17.1987(5)
_cell_angle_alpha                       90
_cell_angle_beta                        107.817(4)
_cell_angle_gamma                       90
_cell_volume                            5578.2(3)
_cell_formula_units_Z                   4
_cell_measurement_temperature           293(2)
_cell_measurement_reflns_used           3942
_cell_measurement_theta_min             3.022
_cell_measurement_theta_max             24.928
_cell_measurement_wavelength            0.71073
 
#----------------------------------------------------------------------------#
#                   CRYSTAL INFORMATION                                      #
#----------------------------------------------------------------------------#
 
_exptl_crystal_description              prism
_exptl_crystal_colour                   colourless
_exptl_crystal_size_max                 0.3
_exptl_crystal_size_mid                 0.2
_exptl_crystal_size_min                 0.2
_exptl_crystal_density_diffrn           1.513
_exptl_crystal_density_method           'not measured'
_exptl_crystal_F_000                    2624
_exptl_special_details
;
 ?
;
 
#----------------------------------------------------------------------------#
#                   ABSORPTION CORRECTION                                    #
#----------------------------------------------------------------------------#
 
_exptl_absorpt_coefficient_mu           1.004
_exptl_absorpt_correction_type          multi-scan
_exptl_absorpt_process_details
;
        CrysAlisPro, Agilent Technologies,
        Version 1.171.36.28 (release 01-02-2013 CrysAlis171 .NET)
        (compiled Feb  1 2013,16:14:44)
        Empirical absorption correction using spherical harmonics,
 implemented in SCALE3 ABSPACK scaling algorithm.
;
_exptl_absorpt_correction_T_min         0.98414
_exptl_absorpt_correction_T_max         1
 
#----------------------------------------------------------------------------#
#                   DATA COLLECTION                                          #
#----------------------------------------------------------------------------#
 
_diffrn_ambient_temperature             293(2)
_diffrn_radiation_wavelength            0.71073
_diffrn_radiation_type                  MoK\a
_diffrn_radiation_monochromator         graphite
_diffrn_radiation_probe                 x-ray
_diffrn_detector_area_resol_mean        16.0696
_diffrn_orient_matrix_ub_11             0.0377134
_diffrn_orient_matrix_ub_12             0.0138575
_diffrn_orient_matrix_ub_13             -0.0107159
_diffrn_orient_matrix_ub_21             -0.0073909
_diffrn_orient_matrix_ub_22             0.0250649
_diffrn_orient_matrix_ub_23             0.0205597
_diffrn_orient_matrix_ub_31             0.0336949
_diffrn_orient_matrix_ub_32             -0.0100152
_diffrn_orient_matrix_ub_33             0.036604
_diffrn_measurement_device_type         'Xcalibur, Sapphire3, Gemini ultra'
_diffrn_measurement_method              '\w scans'
_diffrn_reflns_av_R_equivalents         0.0664
_diffrn_reflns_av_unetI/netI            0.1094
_diffrn_reflns_number                   22528
_diffrn_reflns_limit_h_min              -17
_diffrn_reflns_limit_h_max              17
_diffrn_reflns_limit_k_min              -27
_diffrn_reflns_limit_k_max              24
_diffrn_reflns_limit_l_min              -20
_diffrn_reflns_limit_l_max              20
_diffrn_reflns_theta_min                2.89
_diffrn_reflns_theta_max                25
_diffrn_reflns_theta_full               25
_diffrn_measured_fraction_theta_full
                                        0.999
_diffrn_measured_fraction_theta_max
                                        0.999
_reflns_number_total                    9829
_reflns_number_gt                       6460
_reflns_threshold_expression            >2\s(I)
 
#----------------------------------------------------------------------------#
#                   COMPUTER PROGRAMS USED                                   #
#----------------------------------------------------------------------------#
 
_computing_data_collection
;
        CrysAlisPro, Agilent Technologies,
        Version 1.171.36.28 (release 01-02-2013 CrysAlis171 .NET)
        (compiled Feb  1 2013,16:14:44)
;
_computing_cell_refinement
;
        CrysAlisPro, Agilent Technologies,
        Version 1.171.36.28 (release 01-02-2013 CrysAlis171 .NET)
        (compiled Feb  1 2013,16:14:44)
;
_computing_data_reduction
;
        CrysAlisPro, Agilent Technologies,
        Version 1.171.36.28 (release 01-02-2013 CrysAlis171 .NET)
        (compiled Feb  1 2013,16:14:44)
;
_computing_structure_refinement         'SHELXL-97 (Sheldrick, 2008)'
_computing_molecular_graphics           'Ortep-3 for Windows (Farrugia, 1997)'
_computing_publication_material
                                   'WinGX publication routines (Farrugia, 1999)'
 
#----------------------------------------------------------------------------#
#                   STRUCTURE SOLUTION
#----------------------------------------------------------------------------#
 
_atom_sites_solution_primary            direct
_atom_sites_solution_secondary          difmap
_atom_sites_solution_hydrogens          geom
 
#----------------------------------------------------------------------------#
#                   REFINEMENT INFORMATION                                   #
#----------------------------------------------------------------------------#
 
_refine_special_details
;
 Refinement of F^2^ against ALL reflections.  The weighted R-factor wR and
 goodness of fit S are based on F^2^, conventional R-factors R are based
 on F, with F set to zero for negative F^2^. The threshold expression of
 F^2^ > 2\s(F^2^) is used only for calculating R-factors(gt) etc. and is
 not relevant to the choice of reflections for refinement.  R-factors based
 on F^2^ are statistically about twice as large as those based on F, and R-
 factors based on ALL data will be even larger.
;
_refine_ls_structure_factor_coef        Fsqd
_refine_ls_matrix_type                  full
_refine_ls_weighting_scheme             calc
_refine_ls_weighting_details
         'calc w=1/[\s^2^(Fo^2^)+(0.0540P)^2^+1.7616P] where P=(Fo^2^+2Fc^2^)/3'
_refine_ls_hydrogen_treatment           constr
_refine_ls_extinction_method            none
_refine_ls_number_reflns                9829
_refine_ls_number_parameters            750
_refine_ls_number_restraints            6
_refine_ls_R_factor_all                 0.1115
_refine_ls_R_factor_gt                  0.0671
_refine_ls_wR_factor_ref                0.1482
_refine_ls_wR_factor_gt                 0.1291
_refine_ls_goodness_of_fit_ref          1.03
_refine_ls_restrained_S_all             1.03
_refine_ls_shift/su_max                 0.001
_refine_ls_shift/su_mean                0
_refine_diff_density_max                0.883
_refine_diff_density_min                -0.69
_refine_diff_density_rms                0.087
 
#----------------------------------------------------------------------------#
#                   ATOMIC TYPES, COORDINATES AND THERMAL PARAMETERS         #
#----------------------------------------------------------------------------#
 
loop_
    _atom_type_symbol
    _atom_type_description
    _atom_type_scat_dispersion_real
    _atom_type_scat_dispersion_imag
    _atom_type_scat_source
C C 0.0033 0.0016 'International Tables Vol C Tables 4.2.6.8 and 6.1.1.4'
H H 0 0 'International Tables Vol C Tables 4.2.6.8 and 6.1.1.4'
N N 0.0061 0.0033 'International Tables Vol C Tables 4.2.6.8 and 6.1.1.4'
O O 0.0106 0.006 'International Tables Vol C Tables 4.2.6.8 and 6.1.1.4'
F F 0.0171 0.0103 'International Tables Vol C Tables 4.2.6.8 and 6.1.1.4'
P P 0.1023 0.0942 'International Tables Vol C Tables 4.2.6.8 and 6.1.1.4'
Zn Zn 0.2839 1.4301 'International Tables Vol C Tables 4.2.6.8 and 6.1.1.4'
 
loop_
    _atom_site_label
    _atom_site_type_symbol
    _atom_site_fract_x
    _atom_site_fract_y
    _atom_site_fract_z
    _atom_site_U_iso_or_equiv
    _atom_site_adp_type
    _atom_site_occupancy
    _atom_site_symmetry_multiplicity
    _atom_site_calc_flag
    _atom_site_refinement_flags
    _atom_site_disorder_assembly
    _atom_site_disorder_group
C1 C 0.4921(4) 0.1768(3) 0.6894(3) 0.0377(15) Uani 1 1 d . . .
H1 H 0.4729 0.1698 0.6335 0.045 Uiso 1 1 calc R . .
C2 C 0.4594(4) 0.1408(3) 0.7378(3) 0.0418(16) Uani 1 1 d . . .
H2 H 0.4207 0.1095 0.716 0.05 Uiso 1 1 calc R . .
C3 C 0.4859(5) 0.1527(3) 0.8198(4) 0.0526(19) Uani 1 1 d . . .
H3 H 0.4647 0.1295 0.8547 0.063 Uiso 1 1 calc R . .
C4 C 0.5443(5) 0.1992(3) 0.8503(3) 0.0449(17) Uani 1 1 d . . .
H4 H 0.5617 0.2078 0.9057 0.054 Uiso 1 1 calc R . .
C5 C 0.5766(4) 0.2329(3) 0.7983(3) 0.0341(14) Uani 1 1 d . . .
C6 C 0.6461(4) 0.2809(3) 0.8301(3) 0.0383(15) Uani 1 1 d . . .
H6A H 0.6267 0.3016 0.8713 0.046 Uiso 1 1 calc R . .
H6B H 0.7097 0.265 0.856 0.046 Uiso 1 1 calc R . .
C7 C 0.4724(4) 0.3724(3) 0.5406(3) 0.0394(15) Uani 1 1 d . . .
H7 H 0.4644 0.3471 0.4973 0.047 Uiso 1 1 calc R . .
C8 C 0.4343(5) 0.4264(3) 0.5259(4) 0.0472(17) Uani 1 1 d . . .
H8 H 0.3998 0.4375 0.4731 0.057 Uiso 1 1 calc R . .
C9 C 0.4475(5) 0.4638(3) 0.5897(4) 0.0577(19) Uani 1 1 d . . .
H9 H 0.4213 0.5004 0.5804 0.069 Uiso 1 1 calc R . .
C10 C 0.4992(5) 0.4475(3) 0.6668(4) 0.0505(18) Uani 1 1 d . . .
H10 H 0.5098 0.4728 0.7104 0.061 Uiso 1 1 calc R . .
C11 C 0.5358(4) 0.3919(3) 0.6788(3) 0.0351(14) Uani 1 1 d . . .
C12 C 0.5887(4) 0.3709(3) 0.7635(3) 0.0365(15) Uani 1 1 d . . .
H12A H 0.6279 0.4019 0.7939 0.044 Uiso 1 1 calc R . .
H12B H 0.5417 0.3611 0.791 0.044 Uiso 1 1 calc R . .
C13 C 0.7538(4) 0.3375(3) 0.7785(3) 0.0347(14) Uani 1 1 d . . .
H13A H 0.7924 0.3032 0.7818 0.042 Uiso 1 1 calc R . .
H13B H 0.778 0.3578 0.8299 0.042 Uiso 1 1 calc R . .
C14 C 0.7644(4) 0.3746(2) 0.7110(3) 0.0284(13) Uani 1 1 d . . .
C15 C 0.7994(4) 0.4303(2) 0.7251(3) 0.0314(14) Uani 1 1 d . . .
H15 H 0.8149 0.4449 0.7779 0.038 Uiso 1 1 calc R . .
C16 C 0.8117(4) 0.4646(2) 0.6639(3) 0.0336(14) Uani 1 1 d . . .
C17 C 0.8592(5) 0.5225(3) 0.6805(4) 0.0480(17) Uani 1 1 d . . .
H17A H 0.875 0.531 0.7376 0.072 Uiso 1 1 calc R . .
H17B H 0.8158 0.551 0.6495 0.072 Uiso 1 1 calc R . .
H17C H 0.917 0.5222 0.6648 0.072 Uiso 1 1 calc R . .
C18 C 0.7819(4) 0.4430(2) 0.5850(3) 0.0335(14) Uani 1 1 d . . .
H18 H 0.7855 0.4662 0.5421 0.04 Uiso 1 1 calc R . .
C19 C 0.7466(4) 0.3874(2) 0.5681(3) 0.0262(12) Uani 1 1 d . . .
C20 C 0.7407(4) 0.3518(2) 0.6319(3) 0.0249(12) Uani 1 1 d . . .
C21 C 0.7151(4) 0.3653(2) 0.4819(3) 0.0303(13) Uani 1 1 d . . .
H21A H 0.6503 0.35 0.4695 0.036 Uiso 1 1 calc R . .
H21B H 0.7132 0.3968 0.4448 0.036 Uiso 1 1 calc R . .
C22 C 0.8713(4) 0.1655(3) 0.4160(3) 0.0371(14) Uani 1 1 d . . .
C23 C 0.8589(4) 0.1441(3) 0.3386(3) 0.0435(16) Uani 1 1 d . . .
H23 H 0.8819 0.1081 0.331 0.052 Uiso 1 1 calc R . .
C24 C 0.8117(5) 0.1777(3) 0.2731(3) 0.0511(19) Uani 1 1 d . . .
H24 H 0.8035 0.1649 0.2202 0.061 Uiso 1 1 calc R . .
C25 C 0.7764(4) 0.2304(3) 0.2858(3) 0.0436(17) Uani 1 1 d . . .
H25 H 0.746 0.2541 0.242 0.052 Uiso 1 1 calc R . .
C26 C 0.7875(4) 0.2473(2) 0.3659(3) 0.0286(13) Uani 1 1 d . . .
C27 C 0.7423(4) 0.3021(2) 0.3817(3) 0.0314(14) Uani 1 1 d . . .
H27A H 0.7548 0.332 0.3471 0.038 Uiso 1 1 calc R . .
H27B H 0.6731 0.297 0.3673 0.038 Uiso 1 1 calc R . .
C28 C 0.9601(4) 0.2744(2) 0.6918(3) 0.0251(12) Uani 1 1 d . . .
C29 C 1.0333(4) 0.3094(2) 0.7366(3) 0.0309(14) Uani 1 1 d . . .
H29 H 1.066 0.3011 0.791 0.037 Uiso 1 1 calc R . .
C30 C 1.0571(4) 0.3566(2) 0.6998(3) 0.0364(14) Uani 1 1 d . . .
H30 H 1.1067 0.3805 0.7288 0.044 Uiso 1 1 calc R . .
C31 C 1.0065(4) 0.3685(2) 0.6184(3) 0.0337(14) Uani 1 1 d . . .
H31 H 1.0206 0.4008 0.5926 0.04 Uiso 1 1 calc R . .
C32 C 0.9357(4) 0.3313(2) 0.5778(3) 0.0247(12) Uani 1 1 d . . .
C33 C 0.8803(4) 0.3396(2) 0.4888(3) 0.0282(13) Uani 1 1 d . . .
H33A H 0.8809 0.3798 0.4754 0.034 Uiso 1 1 calc R . .
H33B H 0.9126 0.3188 0.4558 0.034 Uiso 1 1 calc R . .
C34 C 1.0147(5) 0.1115(3) 0.4921(4) 0.0495(18) Uani 1 1 d . . .
C35 C 1.0751(5) 0.0919(3) 0.5755(4) 0.059(2) Uani 1 1 d . . .
C36A C 1.1027(8) 0.1429(4) 0.6312(5) 0.128(4) Uani 1 1 d . . .
H36G H 1.0456 0.1628 0.6325 0.192 Uiso 1 1 calc R . .
H36H H 1.1426 0.1681 0.6114 0.192 Uiso 1 1 calc R . .
H36I H 1.1376 0.1303 0.6853 0.192 Uiso 1 1 calc R . .
C36B C 1.1573(6) 0.0569(5) 0.5677(5) 0.149(6) Uani 1 1 d . . .
H36A H 1.1959 0.0445 0.6208 0.224 Uiso 1 1 calc R . .
H36B H 1.196 0.0795 0.5431 0.224 Uiso 1 1 calc R . .
H36C H 1.133 0.0241 0.5341 0.224 Uiso 1 1 calc R . .
C36C C 1.0150(6) 0.0541(4) 0.6138(4) 0.096(3) Uani 1 1 d . . .
H36D H 0.962 0.0759 0.6205 0.144 Uiso 1 1 calc R . .
H36E H 1.0545 0.0408 0.6661 0.144 Uiso 1 1 calc R . .
H36F H 0.9906 0.022 0.5789 0.144 Uiso 1 1 calc R . .
C37 C 0.8777(4) 0.1826(2) 0.6982(3) 0.0249(12) Uani 1 1 d . . .
C38 C 0.8667(4) 0.1364(2) 0.7575(3) 0.0273(13) Uani 1 1 d . . .
C39A C 0.8126(4) 0.1624(3) 0.8128(3) 0.0407(15) Uani 1 1 d . . .
H39G H 0.8052 0.134 0.8507 0.061 Uiso 1 1 calc R . .
H39H H 0.7503 0.1753 0.78 0.061 Uiso 1 1 calc R . .
H39I H 0.8486 0.1942 0.8423 0.061 Uiso 1 1 calc R . .
C39B C 0.9643(4) 0.1128(2) 0.8082(3) 0.0336(14) Uani 1 1 d . . .
H39A H 0.9549 0.0839 0.8446 0.05 Uiso 1 1 calc R . .
H39B H 1.0027 0.1433 0.8393 0.05 Uiso 1 1 calc R . .
H39C H 0.9967 0.0965 0.7726 0.05 Uiso 1 1 calc R . .
C39C C 0.8059(4) 0.0874(3) 0.7090(3) 0.0439(16) Uani 1 1 d . . .
H39D H 0.7991 0.0581 0.746 0.066 Uiso 1 1 calc R . .
H39E H 0.8372 0.0717 0.6721 0.066 Uiso 1 1 calc R . .
H39F H 0.7434 0.1015 0.6785 0.066 Uiso 1 1 calc R . .
C40 C 0.5644(4) 0.0174(3) 0.3969(3) 0.0376(15) Uani 1 1 d . . .
H40 H 0.5573 -0.0088 0.3548 0.045 Uiso 1 1 calc R . .
C41 C 0.5288(4) 0.0722(2) 0.3811(3) 0.0355(14) Uani 1 1 d . . .
H41 H 0.497 0.0833 0.3277 0.043 Uiso 1 1 calc R . .
C42 C 0.5399(4) 0.1103(2) 0.4436(3) 0.0257(12) Uani 1 1 d . . .
C43 C 0.5867(4) 0.0948(2) 0.5232(3) 0.0341(14) Uani 1 1 d . . .
H43 H 0.5943 0.1211 0.5652 0.041 Uiso 1 1 calc R . .
C44 C 0.6223(4) 0.0400(2) 0.5403(3) 0.0358(15) Uani 1 1 d . . .
H44 H 0.6533 0.0288 0.5938 0.043 Uiso 1 1 calc R . .
C45 C 0.6110(4) 0.0024(2) 0.4769(3) 0.0303(13) Uani 1 1 d . . .
C46 C 0.2188(12) 0.3470(7) 0.5278(9) 0.242(8) Uiso 1 1 d . . .
H46A H 0.164 0.3696 0.5282 0.363 Uiso 1 1 calc R . .
H46B H 0.228 0.3493 0.4749 0.363 Uiso 1 1 calc R . .
H46C H 0.2752 0.3612 0.5684 0.363 Uiso 1 1 calc R . .
N1 N 0.5504(3) 0.2215(2) 0.7180(2) 0.0290(11) Uani 1 1 d . . .
N2 N 0.6513(3) 0.32085(19) 0.7658(2) 0.0294(11) Uani 1 1 d . . .
N3 N 0.5214(3) 0.35536(19) 0.6171(2) 0.0270(10) Uani 1 1 d . . .
N4 N 0.8337(3) 0.2148(2) 0.4302(2) 0.0303(11) Uani 1 1 d . . .
N5 N 0.7801(3) 0.31996(18) 0.4679(2) 0.0248(10) Uani 1 1 d . . .
N6 N 0.9124(3) 0.28406(18) 0.6125(2) 0.0225(10) Uani 1 1 d . . .
N7 N 0.9275(3) 0.1365(2) 0.4857(3) 0.0402(13) Uani 1 1 d . . .
H7A H 0.906 0.1343 0.5269 0.048 Uiso 1 1 calc R . .
N8 N 0.9338(3) 0.22733(19) 0.7310(2) 0.0256(10) Uani 1 1 d . . .
H8A H 0.9568 0.2272 0.7834 0.031 Uiso 1 1 calc R . .
N9 N 0.6477(4) -0.0559(2) 0.4960(3) 0.0391(12) Uani 1 1 d . . .
O1 O 0.7133(2) 0.29655(15) 0.61724(18) 0.0256(8) Uani 1 1 d . . .
O2 O 0.5245(3) 0.23378(16) 0.54043(18) 0.0310(9) Uani 1 1 d . . .
O3 O 0.6607(2) 0.20986(15) 0.48442(19) 0.0283(9) Uani 1 1 d . . .
O4 O 1.0407(3) 0.1067(3) 0.4323(3) 0.0857(19) Uani 1 1 d . . .
O5 O 0.8344(3) 0.17790(15) 0.62309(18) 0.0296(9) Uani 1 1 d . . .
O6 O 0.5160(3) 0.26657(15) 0.39948(18) 0.0336(10) Uani 1 1 d . . .
O7 O 0.5009(3) 0.16399(15) 0.42356(19) 0.0300(9) Uani 1 1 d . . .
O8 O 0.6991(3) -0.06659(18) 0.5656(2) 0.0528(12) Uani 1 1 d . . .
O9 O 0.6253(3) -0.09176(18) 0.4417(3) 0.0545(12) Uani 1 1 d . . .
O10 O 0.3254(4) 0.2242(5) 0.5022(3) 0.183(4) Uani 1 1 d . . .
H98 H 0.3205 0.2627 0.4949 0.219 Uiso 1 1 d R . .
H99 H 0.2985 0.2156 0.5418 0.219 Uiso 1 1 d R . .
O11 O 0.2004(8) 0.2796(5) 0.5482(6) 0.211(4) Uiso 1 1 d . . .
H11B H 0.1528 0.2633 0.5019 0.316 Uiso 1 1 d R . .
F1 F 1.1991(4) 0.4430(2) 0.6500(3) 0.1075(17) Uani 1 1 d . A .
F6 F 1.2076(4) 0.5701(2) 0.7066(4) 0.123(2) Uani 1 1 d . A .
F2 F 1.2704(15) 0.4805(7) 0.7580(9) 0.154(10) Uani 0.57(2) 1 d PD A 1
F3 F 1.1177(12) 0.4926(5) 0.7082(12) 0.108(7) Uani 0.57(2) 1 d PD A 1
F4 F 1.1374(13) 0.5327(7) 0.6013(7) 0.128(7) Uani 0.57(2) 1 d PD A 1
F5 F 1.2939(13) 0.5229(6) 0.6542(18) 0.161(11) Uani 0.57(2) 1 d PD A 1
F2' F 1.3102(8) 0.5014(10) 0.7269(12) 0.095(8) Uani 0.43(2) 1 d PD A 2
F3' F 1.1789(17) 0.5001(11) 0.7578(9) 0.143(10) Uani 0.43(2) 1 d PD A 2
F4' F 1.0960(8) 0.5083(10) 0.6303(14) 0.147(12) Uani 0.43(2) 1 d PD A 2
F5' F 1.2315(18) 0.5135(7) 0.5994(7) 0.096(8) Uani 0.43(2) 1 d PD A 2
P1 P 1.20415(13) 0.50645(7) 0.67894(10) 0.0436(4) Uani 1 1 d . . .
P2 P 0.55510(10) 0.22330(6) 0.46449(7) 0.0242(3) Uani 1 1 d . . .
Zn1 Zn 0.59213(4) 0.27795(3) 0.64217(3) 0.02639(18) Uani 1 1 d . . .
Zn2 Zn 0.77994(4) 0.24790(3) 0.54389(3) 0.02358(17) Uani 1 1 d . . .
 
loop_
    _atom_site_aniso_label
    _atom_site_aniso_U_11
    _atom_site_aniso_U_22
    _atom_site_aniso_U_33
    _atom_site_aniso_U_23
    _atom_site_aniso_U_13
    _atom_site_aniso_U_12
C1 0.048(4) 0.039(4) 0.030(3) 0.001(3) 0.019(3) -0.001(3)
C2 0.050(4) 0.041(4) 0.041(3) -0.004(3) 0.023(3) -0.011(3)
C3 0.083(5) 0.048(5) 0.040(4) 0.000(3) 0.039(4) -0.005(4)
C4 0.063(5) 0.049(4) 0.031(3) -0.006(3) 0.027(3) -0.006(4)
C5 0.040(4) 0.039(4) 0.027(3) 0.000(3) 0.015(3) 0.008(3)
C6 0.046(4) 0.043(4) 0.028(3) -0.006(3) 0.015(3) -0.006(3)
C7 0.039(4) 0.036(4) 0.038(3) -0.007(3) 0.005(3) 0.003(3)
C8 0.050(4) 0.041(4) 0.046(3) -0.005(3) 0.007(3) 0.015(3)
C9 0.064(5) 0.035(4) 0.068(4) -0.013(4) 0.010(4) 0.018(4)
C10 0.059(5) 0.042(4) 0.051(4) -0.015(3) 0.018(3) 0.008(4)
C11 0.035(4) 0.034(4) 0.039(3) -0.007(3) 0.015(3) 0.002(3)
C12 0.041(4) 0.042(4) 0.030(3) -0.015(3) 0.017(3) 0.002(3)
C13 0.034(3) 0.039(4) 0.027(3) -0.016(3) 0.003(2) -0.004(3)
C14 0.026(3) 0.033(4) 0.026(3) -0.007(3) 0.006(2) -0.005(3)
C15 0.026(3) 0.033(4) 0.034(3) -0.013(3) 0.007(2) -0.005(3)
C16 0.030(3) 0.027(3) 0.046(3) -0.009(3) 0.015(3) -0.004(3)
C17 0.052(4) 0.033(4) 0.063(4) -0.014(3) 0.023(3) -0.012(3)
C18 0.037(4) 0.021(3) 0.042(3) 0.006(3) 0.012(3) 0.003(3)
C19 0.026(3) 0.019(3) 0.033(3) -0.003(2) 0.008(2) -0.001(2)
C20 0.020(3) 0.025(3) 0.030(3) -0.008(2) 0.008(2) -0.003(2)
C21 0.033(3) 0.023(3) 0.033(3) 0.002(3) 0.007(2) 0.003(3)
C22 0.035(4) 0.036(4) 0.040(3) 0.000(3) 0.011(3) -0.002(3)
C23 0.047(4) 0.046(4) 0.039(3) -0.017(3) 0.015(3) 0.004(3)
C24 0.050(4) 0.071(5) 0.028(3) -0.016(3) 0.006(3) 0.007(4)
C25 0.046(4) 0.059(5) 0.025(3) -0.002(3) 0.009(3) 0.008(3)
C26 0.032(3) 0.034(3) 0.020(3) -0.002(3) 0.009(2) -0.009(3)
C27 0.042(4) 0.031(3) 0.017(2) 0.003(2) 0.004(2) -0.003(3)
C28 0.030(3) 0.023(3) 0.022(3) 0.005(2) 0.008(2) 0.003(3)
C29 0.035(3) 0.032(3) 0.021(3) 0.002(2) 0.001(2) -0.011(3)
C30 0.033(4) 0.035(4) 0.038(3) 0.004(3) 0.007(3) -0.017(3)
C31 0.038(4) 0.034(4) 0.030(3) 0.006(3) 0.012(3) -0.011(3)
C32 0.027(3) 0.026(3) 0.024(3) -0.003(2) 0.012(2) -0.004(3)
C33 0.029(3) 0.027(3) 0.032(3) 0.007(2) 0.013(2) -0.002(3)
C34 0.053(5) 0.060(5) 0.042(4) 0.011(3) 0.024(3) 0.011(4)
C35 0.062(5) 0.073(6) 0.045(4) 0.010(4) 0.020(4) 0.025(4)
C36A 0.130(9) 0.114(9) 0.094(6) -0.010(7) -0.032(6) 0.001(8)
C36B 0.099(7) 0.289(16) 0.073(5) 0.068(7) 0.045(5) 0.141(9)
C36C 0.102(7) 0.123(8) 0.069(5) 0.047(5) 0.032(5) 0.046(6)
C37 0.024(3) 0.024(3) 0.026(3) 0.002(2) 0.007(2) 0.005(3)
C38 0.033(3) 0.024(3) 0.025(3) 0.006(2) 0.008(2) -0.009(3)
C39A 0.041(4) 0.044(4) 0.041(3) 0.010(3) 0.019(3) -0.003(3)
C39B 0.040(4) 0.017(3) 0.039(3) 0.004(3) 0.005(3) 0.002(3)
C39C 0.050(4) 0.038(4) 0.037(3) 0.004(3) 0.003(3) -0.016(3)
C40 0.052(4) 0.033(4) 0.026(3) -0.009(3) 0.008(3) -0.003(3)
C41 0.050(4) 0.027(4) 0.024(3) -0.001(3) 0.003(3) 0.001(3)
C42 0.026(3) 0.019(3) 0.030(3) -0.003(2) 0.005(2) -0.005(2)
C43 0.048(4) 0.026(3) 0.024(3) -0.005(2) 0.005(3) 0.003(3)
C44 0.041(4) 0.035(4) 0.027(3) 0.006(3) 0.003(3) -0.004(3)
C45 0.033(3) 0.019(3) 0.039(3) 0.001(3) 0.013(3) -0.002(3)
N1 0.033(3) 0.032(3) 0.024(2) -0.007(2) 0.012(2) -0.001(2)
N2 0.033(3) 0.035(3) 0.021(2) -0.006(2) 0.0101(19) -0.004(2)
N3 0.027(3) 0.027(3) 0.027(2) -0.005(2) 0.009(2) -0.001(2)
N4 0.034(3) 0.035(3) 0.020(2) 0.001(2) 0.0060(19) 0.002(2)
N5 0.028(3) 0.024(3) 0.021(2) 0.0013(19) 0.0057(19) 0.001(2)
N6 0.023(2) 0.025(3) 0.022(2) 0.0024(19) 0.0098(18) -0.003(2)
N7 0.044(3) 0.044(3) 0.035(3) 0.012(2) 0.015(2) 0.012(3)
N8 0.027(3) 0.031(3) 0.016(2) 0.0028(19) 0.0024(18) -0.005(2)
N9 0.038(3) 0.032(3) 0.049(3) 0.000(3) 0.015(3) -0.003(3)
O1 0.030(2) 0.025(2) 0.0252(17) -0.0077(16) 0.0138(15) -0.0081(17)
O2 0.034(2) 0.035(2) 0.0246(18) -0.0061(16) 0.0103(16) -0.0083(18)
O3 0.028(2) 0.025(2) 0.0297(18) -0.0064(16) 0.0054(16) -0.0018(17)
O4 0.065(4) 0.144(6) 0.059(3) 0.031(3) 0.035(3) 0.050(4)
O5 0.038(2) 0.028(2) 0.0175(17) 0.0017(16) 0.0002(16) -0.0039(18)
O6 0.046(3) 0.027(2) 0.0216(17) -0.0003(16) 0.0022(17) 0.0020(19)
O7 0.031(2) 0.022(2) 0.0294(19) -0.0054(16) -0.0007(16) 0.0015(18)
O8 0.067(3) 0.040(3) 0.046(2) 0.013(2) 0.010(2) 0.013(2)
O9 0.063(3) 0.028(3) 0.068(3) -0.015(2) 0.015(2) -0.002(2)
O10 0.049(4) 0.390(14) 0.094(4) 0.021(6) -0.002(3) 0.008(6)
F1 0.123(5) 0.057(3) 0.151(4) -0.031(3) 0.055(4) -0.019(3)
F6 0.128(5) 0.042(3) 0.202(6) -0.021(4) 0.056(4) -0.001(3)
F2 0.17(2) 0.105(11) 0.114(10) 0.040(8) -0.056(12) 0.022(12)
F3 0.118(13) 0.065(7) 0.193(17) 0.034(10) 0.125(13) 0.001(8)
F4 0.137(16) 0.141(13) 0.082(7) 0.074(7) -0.003(9) 0.031(11)
F5 0.105(13) 0.088(10) 0.35(3) 0.090(16) 0.152(17) 0.028(9)
F2' 0.033(7) 0.100(18) 0.126(16) -0.042(12) -0.016(8) 0.005(8)
F3' 0.16(2) 0.24(2) 0.044(9) -0.014(10) 0.053(11) 0.007(18)
F4' 0.035(8) 0.15(3) 0.22(3) -0.05(2) -0.007(13) -0.002(10)
F5' 0.16(2) 0.104(11) 0.036(7) 0.017(6) 0.043(8) -0.013(13)
P1 0.0474(11) 0.0317(10) 0.0511(10) 0.0064(8) 0.0143(8) -0.0033(8)
P2 0.0288(8) 0.0220(8) 0.0193(6) -0.0033(6) 0.0036(6) -0.0008(7)
Zn1 0.0294(4) 0.0288(4) 0.0213(3) -0.0040(3) 0.0083(3) -0.0028(3)
Zn2 0.0261(3) 0.0230(4) 0.0198(3) 0.0010(3) 0.0045(2) -0.0028(3)
 
 
#----------------------------------------------------------------------------#
#                   MOLECULAR GEOMETRY                                       #
#----------------------------------------------------------------------------#
 
_geom_special_details
;
 All s.u.'s (except the s.u. in the dihedral angle between two l.s. planes)
 are estimated using the full covariance matrix.  The cell s.u.'s are taken
 into account individually in the estimation of s.u.'s in distances, angles
 and torsion angles; correlations between s.u.'s in cell parameters are only
 used when they are defined by crystal symmetry.  An approximate (isotropic)
 treatment of cell s.u.'s is used for estimating s.u.'s involving l.s. planes.
;
loop_
    _geom_bond_atom_site_label_1
    _geom_bond_atom_site_label_2
    _geom_bond_distance
    _geom_bond_site_symmetry_2
    _geom_bond_publ_flag
C1 N1 1.342(7) . ?
C1 C2 1.368(7) . ?
C1 H1 0.93 . ?
C2 C3 1.371(7) . ?
C2 H2 0.93 . ?
C3 C4 1.383(8) . ?
C3 H3 0.93 . ?
C4 C5 1.378(7) . ?
C4 H4 0.93 . ?
C5 N1 1.342(6) . ?
C5 C6 1.497(8) . ?
C6 N2 1.468(6) . ?
C6 H6A 0.97 . ?
C6 H6B 0.97 . ?
C7 N3 1.351(6) . ?
C7 C8 1.372(8) . ?
C7 H7 0.93 . ?
C8 C9 1.370(8) . ?
C8 H8 0.93 . ?
C9 C10 1.364(8) . ?
C9 H9 0.93 . ?
C10 C11 1.395(8) . ?
C10 H10 0.93 . ?
C11 N3 1.328(6) . ?
C11 C12 1.508(7) . ?
C12 N2 1.478(7) . ?
C12 H12A 0.97 . ?
C12 H12B 0.97 . ?
C13 N2 1.493(6) . ?
C13 C14 1.494(7) . ?
C13 H13A 0.97 . ?
C13 H13B 0.97 . ?
C14 C15 1.394(7) . ?
C14 C20 1.403(6) . ?
C15 C16 1.378(7) . ?
C15 H15 0.93 . ?
C16 C18 1.388(7) . ?
C16 C17 1.507(7) . ?
C17 H17A 0.96 . ?
C17 H17B 0.96 . ?
C17 H17C 0.96 . ?
C18 C19 1.397(7) . ?
C18 H18 0.93 . ?
C19 C20 1.400(7) . ?
C19 C21 1.502(7) . ?
C20 O1 1.353(6) . ?
C21 N5 1.490(6) . ?
C21 H21A 0.97 . ?
C21 H21B 0.97 . ?
C22 N4 1.332(7) . ?
C22 C23 1.382(7) . ?
C22 N7 1.402(7) . ?
C23 C24 1.372(8) . ?
C23 H23 0.93 . ?
C24 C25 1.379(8) . ?
C24 H24 0.93 . ?
C25 C26 1.393(7) . ?
C25 H25 0.93 . ?
C26 N4 1.341(6) . ?
C26 C27 1.503(7) . ?
C27 N5 1.475(6) . ?
C27 H27A 0.97 . ?
C27 H27B 0.97 . ?
C28 N6 1.347(6) . ?
C28 C29 1.378(7) . ?
C28 N8 1.404(6) . ?
C29 C30 1.368(7) . ?
C29 H29 0.93 . ?
C30 C31 1.397(7) . ?
C30 H30 0.93 . ?
C31 C32 1.366(7) . ?
C31 H31 0.93 . ?
C32 N6 1.349(6) . ?
C32 C33 1.508(6) . ?
C33 N5 1.467(6) . ?
C33 H33A 0.97 . ?
C33 H33B 0.97 . ?
C34 O4 1.205(6) . ?
C34 N7 1.373(7) . ?
C34 C35 1.506(8) . ?
C35 C36B 1.491(9) . ?
C35 C36A 1.506(11) . ?
C35 C36C 1.528(10) . ?
C36A H36G 0.96 . ?
C36A H36H 0.96 . ?
C36A H36I 0.96 . ?
C36B H36A 0.96 . ?
C36B H36B 0.96 . ?
C36B H36C 0.96 . ?
C36C H36D 0.96 . ?
C36C H36E 0.96 . ?
C36C H36F 0.96 . ?
C37 O5 1.257(5) . ?
C37 N8 1.340(6) . ?
C37 C38 1.527(7) . ?
C38 C39B 1.526(7) . ?
C38 C39C 1.530(7) . ?
C38 C39A 1.534(7) . ?
C39A H39G 0.96 . ?
C39A H39H 0.96 . ?
C39A H39I 0.96 . ?
C39B H39A 0.96 . ?
C39B H39B 0.96 . ?
C39B H39C 0.96 . ?
C39C H39D 0.96 . ?
C39C H39E 0.96 . ?
C39C H39F 0.96 . ?
C40 C41 1.378(7) . ?
C40 C45 1.380(7) . ?
C40 H40 0.93 . ?
C41 C42 1.366(7) . ?
C41 H41 0.93 . ?
C42 O7 1.378(6) . ?
C42 C43 1.379(7) . ?
C43 C44 1.378(7) . ?
C43 H43 0.93 . ?
C44 C45 1.371(7) . ?
C44 H44 0.93 . ?
C45 N9 1.463(7) . ?
C46 O11 1.654(16) . ?
C46 H46A 0.96 . ?
C46 H46B 0.96 . ?
C46 H46C 0.96 . ?
N1 Zn1 2.074(4) . ?
N2 Zn1 2.269(4) . ?
N3 Zn1 2.062(4) . ?
N4 Zn2 2.443(4) . ?
N5 Zn2 2.133(4) . ?
N6 Zn2 2.107(4) . ?
N7 H7A 0.86 . ?
N8 H8A 0.86 . ?
N9 O9 1.224(6) . ?
N9 O8 1.227(5) . ?
O1 Zn1 1.987(3) . ?
O1 Zn2 2.140(3) . ?
O2 P2 1.523(3) . ?
O2 Zn1 2.011(3) . ?
O3 P2 1.504(4) . ?
O3 Zn2 1.941(3) . ?
O5 Zn2 2.122(3) . ?
O6 P2 1.486(4) . ?
O7 P2 1.644(4) . ?
O10 H98 0.9093 . ?
O10 H99 0.9054 . ?
O11 H11B 0.96 . ?
F1 P1 1.559(5) . ?
F6 P1 1.560(5) . ?
F2 P1 1.531(9) . ?
F3 P1 1.527(8) . ?
F4 P1 1.521(8) . ?
F5 P1 1.542(8) . ?
F2' P1 1.517(9) . ?
F3' P1 1.518(9) . ?
F4' P1 1.542(10) . ?
F5' P1 1.547(10) . ?
Zn1 Zn2 3.6971(8) . ?
 
loop_
    _geom_angle_atom_site_label_1
    _geom_angle_atom_site_label_2
    _geom_angle_atom_site_label_3
    _geom_angle
    _geom_angle_site_symmetry_1
    _geom_angle_site_symmetry_3
    _geom_angle_publ_flag
N1 C1 C2 123.7(5) . . ?
N1 C1 H1 118.1 . . ?
C2 C1 H1 118.1 . . ?
C1 C2 C3 117.4(6) . . ?
C1 C2 H2 121.3 . . ?
C3 C2 H2 121.3 . . ?
C2 C3 C4 119.8(6) . . ?
C2 C3 H3 120.1 . . ?
C4 C3 H3 120.1 . . ?
C5 C4 C3 119.8(5) . . ?
C5 C4 H4 120.1 . . ?
C3 C4 H4 120.1 . . ?
N1 C5 C4 120.5(6) . . ?
N1 C5 C6 118.2(5) . . ?
C4 C5 C6 121.2(5) . . ?
N2 C6 C5 112.8(4) . . ?
N2 C6 H6A 109 . . ?
C5 C6 H6A 109 . . ?
N2 C6 H6B 109 . . ?
C5 C6 H6B 109 . . ?
H6A C6 H6B 107.8 . . ?
N3 C7 C8 121.0(5) . . ?
N3 C7 H7 119.5 . . ?
C8 C7 H7 119.5 . . ?
C9 C8 C7 119.4(6) . . ?
C9 C8 H8 120.3 . . ?
C7 C8 H8 120.3 . . ?
C10 C9 C8 120.0(6) . . ?
C10 C9 H9 120 . . ?
C8 C9 H9 120 . . ?
C9 C10 C11 118.5(6) . . ?
C9 C10 H10 120.8 . . ?
C11 C10 H10 120.8 . . ?
N3 C11 C10 121.5(5) . . ?
N3 C11 C12 118.1(5) . . ?
C10 C11 C12 120.3(5) . . ?
N2 C12 C11 114.3(4) . . ?
N2 C12 H12A 108.7 . . ?
C11 C12 H12A 108.7 . . ?
N2 C12 H12B 108.7 . . ?
C11 C12 H12B 108.7 . . ?
H12A C12 H12B 107.6 . . ?
N2 C13 C14 112.0(4) . . ?
N2 C13 H13A 109.2 . . ?
C14 C13 H13A 109.2 . . ?
N2 C13 H13B 109.2 . . ?
C14 C13 H13B 109.2 . . ?
H13A C13 H13B 107.9 . . ?
C15 C14 C20 119.5(5) . . ?
C15 C14 C13 121.8(4) . . ?
C20 C14 C13 118.7(5) . . ?
C16 C15 C14 122.5(5) . . ?
C16 C15 H15 118.8 . . ?
C14 C15 H15 118.8 . . ?
C15 C16 C18 117.5(5) . . ?
C15 C16 C17 122.5(5) . . ?
C18 C16 C17 120.0(5) . . ?
C16 C17 H17A 109.5 . . ?
C16 C17 H17B 109.5 . . ?
H17A C17 H17B 109.5 . . ?
C16 C17 H17C 109.5 . . ?
H17A C17 H17C 109.5 . . ?
H17B C17 H17C 109.5 . . ?
C16 C18 C19 121.8(5) . . ?
C16 C18 H18 119.1 . . ?
C19 C18 H18 119.1 . . ?
C18 C19 C20 119.8(5) . . ?
C18 C19 C21 120.5(5) . . ?
C20 C19 C21 119.7(5) . . ?
O1 C20 C19 120.4(4) . . ?
O1 C20 C14 120.9(4) . . ?
C19 C20 C14 118.7(5) . . ?
N5 C21 C19 112.7(4) . . ?
N5 C21 H21A 109 . . ?
C19 C21 H21A 109 . . ?
N5 C21 H21B 109 . . ?
C19 C21 H21B 109 . . ?
H21A C21 H21B 107.8 . . ?
N4 C22 C23 123.4(5) . . ?
N4 C22 N7 115.3(5) . . ?
C23 C22 N7 121.3(6) . . ?
C24 C23 C22 117.9(6) . . ?
C24 C23 H23 121 . . ?
C22 C23 H23 121 . . ?
C23 C24 C25 120.0(5) . . ?
C23 C24 H24 120 . . ?
C25 C24 H24 120 . . ?
C24 C25 C26 118.3(6) . . ?
C24 C25 H25 120.9 . . ?
C26 C25 H25 120.9 . . ?
N4 C26 C25 122.2(5) . . ?
N4 C26 C27 118.0(4) . . ?
C25 C26 C27 119.7(5) . . ?
N5 C27 C26 112.0(4) . . ?
N5 C27 H27A 109.2 . . ?
C26 C27 H27A 109.2 . . ?
N5 C27 H27B 109.2 . . ?
C26 C27 H27B 109.2 . . ?
H27A C27 H27B 107.9 . . ?
N6 C28 C29 122.5(5) . . ?
N6 C28 N8 119.0(5) . . ?
C29 C28 N8 118.4(4) . . ?
C30 C29 C28 118.8(5) . . ?
C30 C29 H29 120.6 . . ?
C28 C29 H29 120.6 . . ?
C29 C30 C31 119.6(5) . . ?
C29 C30 H30 120.2 . . ?
C31 C30 H30 120.2 . . ?
C32 C31 C30 118.0(5) . . ?
C32 C31 H31 121 . . ?
C30 C31 H31 121 . . ?
N6 C32 C31 123.3(4) . . ?
N6 C32 C33 115.2(4) . . ?
C31 C32 C33 121.5(5) . . ?
N5 C33 C32 113.1(4) . . ?
N5 C33 H33A 109 . . ?
C32 C33 H33A 109 . . ?
N5 C33 H33B 109 . . ?
C32 C33 H33B 109 . . ?
H33A C33 H33B 107.8 . . ?
O4 C34 N7 119.7(6) . . ?
O4 C34 C35 122.7(6) . . ?
N7 C34 C35 117.5(5) . . ?
C36B C35 C34 109.4(6) . . ?
C36B C35 C36A 115.2(8) . . ?
C34 C35 C36A 109.3(6) . . ?
C36B C35 C36C 107.7(7) . . ?
C34 C35 C36C 110.0(6) . . ?
C36A C35 C36C 105.0(7) . . ?
C35 C36A H36G 109.5 . . ?
C35 C36A H36H 109.5 . . ?
H36G C36A H36H 109.5 . . ?
C35 C36A H36I 109.5 . . ?
H36G C36A H36I 109.5 . . ?
H36H C36A H36I 109.5 . . ?
C35 C36B H36A 109.5 . . ?
C35 C36B H36B 109.5 . . ?
H36A C36B H36B 109.5 . . ?
C35 C36B H36C 109.5 . . ?
H36A C36B H36C 109.5 . . ?
H36B C36B H36C 109.5 . . ?
C35 C36C H36D 109.5 . . ?
C35 C36C H36E 109.5 . . ?
H36D C36C H36E 109.5 . . ?
C35 C36C H36F 109.5 . . ?
H36D C36C H36F 109.5 . . ?
H36E C36C H36F 109.5 . . ?
O5 C37 N8 123.4(5) . . ?
O5 C37 C38 120.1(5) . . ?
N8 C37 C38 116.5(4) . . ?
C39B C38 C37 111.5(4) . . ?
C39B C38 C39C 108.9(5) . . ?
C37 C38 C39C 109.1(4) . . ?
C39B C38 C39A 110.7(4) . . ?
C37 C38 C39A 108.2(4) . . ?
C39C C38 C39A 108.3(5) . . ?
C38 C39A H39G 109.5 . . ?
C38 C39A H39H 109.5 . . ?
H39G C39A H39H 109.5 . . ?
C38 C39A H39I 109.5 . . ?
H39G C39A H39I 109.5 . . ?
H39H C39A H39I 109.5 . . ?
C38 C39B H39A 109.5 . . ?
C38 C39B H39B 109.5 . . ?
H39A C39B H39B 109.5 . . ?
C38 C39B H39C 109.5 . . ?
H39A C39B H39C 109.5 . . ?
H39B C39B H39C 109.5 . . ?
C38 C39C H39D 109.5 . . ?
C38 C39C H39E 109.5 . . ?
H39D C39C H39E 109.5 . . ?
C38 C39C H39F 109.5 . . ?
H39D C39C H39F 109.5 . . ?
H39E C39C H39F 109.5 . . ?
C41 C40 C45 118.3(5) . . ?
C41 C40 H40 120.9 . . ?
C45 C40 H40 120.9 . . ?
C42 C41 C40 120.3(5) . . ?
C42 C41 H41 119.9 . . ?
C40 C41 H41 119.9 . . ?
C41 C42 O7 117.2(4) . . ?
C41 C42 C43 120.8(5) . . ?
O7 C42 C43 122.0(5) . . ?
C44 C43 C42 119.7(5) . . ?
C44 C43 H43 120.1 . . ?
C42 C43 H43 120.1 . . ?
C45 C44 C43 118.7(5) . . ?
C45 C44 H44 120.6 . . ?
C43 C44 H44 120.6 . . ?
C44 C45 C40 122.1(5) . . ?
C44 C45 N9 118.2(5) . . ?
C40 C45 N9 119.7(5) . . ?
O11 C46 H46A 109.5 . . ?
O11 C46 H46B 109.5 . . ?
H46A C46 H46B 109.5 . . ?
O11 C46 H46C 109.5 . . ?
H46A C46 H46C 109.5 . . ?
H46B C46 H46C 109.5 . . ?
C1 N1 C5 118.8(5) . . ?
C1 N1 Zn1 122.6(3) . . ?
C5 N1 Zn1 118.3(4) . . ?
C6 N2 C12 110.5(4) . . ?
C6 N2 C13 109.6(4) . . ?
C12 N2 C13 112.3(4) . . ?
C6 N2 Zn1 109.4(3) . . ?
C12 N2 Zn1 105.8(3) . . ?
C13 N2 Zn1 109.2(3) . . ?
C11 N3 C7 119.7(5) . . ?
C11 N3 Zn1 116.9(3) . . ?
C7 N3 Zn1 122.9(4) . . ?
C22 N4 C26 118.0(4) . . ?
C22 N4 Zn2 132.2(4) . . ?
C26 N4 Zn2 106.2(3) . . ?
C33 N5 C27 111.8(4) . . ?
C33 N5 C21 111.9(4) . . ?
C27 N5 C21 107.7(4) . . ?
C33 N5 Zn2 106.5(3) . . ?
C27 N5 Zn2 108.8(3) . . ?
C21 N5 Zn2 110.1(3) . . ?
C28 N6 C32 117.7(4) . . ?
C28 N6 Zn2 126.9(3) . . ?
C32 N6 Zn2 113.1(3) . . ?
C34 N7 C22 124.0(5) . . ?
C34 N7 H7A 118 . . ?
C22 N7 H7A 118 . . ?
C37 N8 C28 129.1(4) . . ?
C37 N8 H8A 115.5 . . ?
C28 N8 H8A 115.5 . . ?
O9 N9 O8 123.0(5) . . ?
O9 N9 C45 118.2(5) . . ?
O8 N9 C45 118.8(5) . . ?
C20 O1 Zn1 113.6(3) . . ?
C20 O1 Zn2 117.1(3) . . ?
Zn1 O1 Zn2 127.16(17) . . ?
P2 O2 Zn1 129.4(2) . . ?
P2 O3 Zn2 135.5(2) . . ?
C37 O5 Zn2 124.3(3) . . ?
C42 O7 P2 123.7(3) . . ?
H98 O10 H99 107 . . ?
C46 O11 H11B 109 . . ?
F2' P1 F3' 89.5(8) . . ?
F2' P1 F4 141.3(9) . . ?
F3' P1 F4 124.0(9) . . ?
F2' P1 F3 127.5(9) . . ?
F3' P1 F3 40.0(5) . . ?
F4 P1 F3 90.3(7) . . ?
F2' P1 F2 39.3(5) . . ?
F3' P1 F2 55.0(10) . . ?
F4 P1 F2 179.0(10) . . ?
F3 P1 F2 89.0(8) . . ?
F2' P1 F5 50.3(8) . . ?
F3' P1 F5 136.8(11) . . ?
F4 P1 F5 91.4(7) . . ?
F3 P1 F5 176.3(10) . . ?
F2 P1 F5 89.2(8) . . ?
F2' P1 F4' 177.2(11) . . ?
F3' P1 F4' 90.0(8) . . ?
F4 P1 F4' 40.5(7) . . ?
F3 P1 F4' 51.4(8) . . ?
F2 P1 F4' 139.0(11) . . ?
F5 P1 F4' 130.9(10) . . ?
F2' P1 F5' 89.7(8) . . ?
F3' P1 F5' 179.0(10) . . ?
F4 P1 F5' 56.5(8) . . ?
F3 P1 F5' 140.9(9) . . ?
F2 P1 F5' 124.4(9) . . ?
F5 P1 F5' 42.3(7) . . ?
F4' P1 F5' 90.8(8) . . ?
F2' P1 F1 92.3(7) . . ?
F3' P1 F1 101.1(10) . . ?
F4 P1 F1 98.6(7) . . ?
F3 P1 F1 86.6(5) . . ?
F2 P1 F1 82.1(7) . . ?
F5 P1 F1 96.4(7) . . ?
F4' P1 F1 85.0(8) . . ?
F5' P1 F1 79.6(7) . . ?
F2' P1 F6 88.6(7) . . ?
F3' P1 F6 79.3(9) . . ?
F4 P1 F6 80.5(7) . . ?
F3 P1 F6 93.1(5) . . ?
F2 P1 F6 98.9(7) . . ?
F5 P1 F6 84.0(7) . . ?
F4' P1 F6 94.0(8) . . ?
F5' P1 F6 100.1(7) . . ?
F1 P1 F6 179.0(4) . . ?
O6 P2 O3 116.3(2) . . ?
O6 P2 O2 113.0(2) . . ?
O3 P2 O2 112.67(19) . . ?
O6 P2 O7 103.24(19) . . ?
O3 P2 O7 104.21(19) . . ?
O2 P2 O7 105.9(2) . . ?
O1 Zn1 O2 98.94(13) . . ?
O1 Zn1 N3 100.53(16) . . ?
O2 Zn1 N3 100.87(15) . . ?
O1 Zn1 N1 136.52(16) . . ?
O2 Zn1 N1 93.48(15) . . ?
N3 Zn1 N1 117.80(17) . . ?
O1 Zn1 N2 89.85(14) . . ?
O2 Zn1 N2 170.74(15) . . ?
N3 Zn1 N2 80.21(16) . . ?
N1 Zn1 N2 78.03(16) . . ?
O1 Zn1 Zn2 27.47(9) . . ?
O2 Zn1 Zn2 74.84(10) . . ?
N3 Zn1 Zn2 117.63(11) . . ?
N1 Zn1 Zn2 124.54(12) . . ?
N2 Zn1 Zn2 112.97(11) . . ?
O3 Zn2 N6 176.22(15) . . ?
O3 Zn2 O5 94.77(14) . . ?
N6 Zn2 O5 81.46(14) . . ?
O3 Zn2 N5 101.98(15) . . ?
N6 Zn2 N5 81.60(16) . . ?
O5 Zn2 N5 158.83(15) . . ?
O3 Zn2 O1 93.42(13) . . ?
N6 Zn2 O1 87.68(14) . . ?
O5 Zn2 O1 100.35(13) . . ?
N5 Zn2 O1 91.55(14) . . ?
O3 Zn2 N4 83.55(14) . . ?
N6 Zn2 N4 96.46(14) . . ?
O5 Zn2 N4 96.96(14) . . ?
N5 Zn2 N4 72.48(15) . . ?
O1 Zn2 N4 162.62(14) . . ?
O3 Zn2 Zn1 70.11(10) . . ?
N6 Zn2 Zn1 110.28(10) . . ?
O5 Zn2 Zn1 92.11(10) . . ?
N5 Zn2 Zn1 105.65(11) . . ?
O1 Zn2 Zn1 25.37(9) . . ?
N4 Zn2 Zn1 152.78(10) . . ?
 
loop_
    _geom_hbond_atom_site_label_D
    _geom_hbond_atom_site_label_H
    _geom_hbond_atom_site_label_A
    _geom_hbond_distance_DH
    _geom_hbond_distance_HA
    _geom_hbond_distance_DA
    _geom_hbond_angle_DHA
    _geom_hbond_site_symmetry_A
N7 H7A O5 0.86 2.43 3.213(6) 151 .
 
# END of CIF
